# Supplementary material for: Epigenetic modification of PHLDA2 is associated with tumor microenvironment and unfavorable outcome of immune checkpoint inhibitor-based therapies in clear cell renal cell carcinoma
Source: Eur J Med Res. 2024 Jul 20;29:378. doi: 10.1186/s40001-024-01939-9 (PMC11264912; doi:10.1186/s40001-024-01939-9)
Supplement: Supplementary file 4 — Supplementary Material 4. [file 40001_2024_1939_MOESM4_ESM.xlsx]

## Sheet: Sheet 1
Supplementary table 1. Differential expressed genes between PHLDA2-H and PHLDA2-L subgroups.
id	baseMean	log2FoldChange	lfcSE	stat	pvalue	padj	gene_name	gene_type
ENSG00000151418.12	130.14	-5.97682	0.512158	-11.6699	1.81673e-31	8.69746e-29	ATP6V1G3	protein_coding
ENSG00000249601.2	190.101	-5.69767	0.31787	-17.9245	7.59122e-72	8.4496e-68	LINC01187	lncRNA
ENSG00000174562.13	21.1938	-5.45785	0.439708	-12.4125	2.23698e-35	1.65995e-32	KLK15	protein_coding
ENSG00000168269.10	321.22	-5.35967	0.383522	-13.9749	2.21967e-44	2.99473e-41	FOXI1	protein_coding
ENSG00000188175.10	197.735	-5.35097	0.30024	-17.8223	4.74174e-71	4.22233e-67	HEPACAM2	protein_coding
ENSG00000267774.2	12.0086	-5.32755	0.560085	-9.51204	1.86964e-21	2.18483e-19	AC010776.2	lncRNA
ENSG00000086159.13	367.801	-5.22507	0.260193	-20.0815	1.07049e-89	2.38307e-85	AQP6	protein_coding
ENSG00000010282.15	104.493	-5.2227	0.306832	-17.0214	5.70253e-65	2.82104e-61	HHATL	protein_coding
ENSG00000227293.1	4.00585	-5.21241	0.795177	-6.55503	5.56314e-11	9.44292e-10	AC118345.1	lncRNA
ENSG00000167748.11	528.123	-5.17513	0.287126	-18.0239	1.26534e-72	1.87789e-68	KLK1	protein_coding
ENSG00000225064.1	14.7806	-5.15684	0.505749	-10.1964	2.05666e-24	3.92999e-22	LINC01802	lncRNA
ENSG00000273664.1	6.48641	-5.12498	0.627206	-8.17113	3.05522e-16	1.43187e-14	AC010776.3	lncRNA
ENSG00000202354.1	3.7287	-5.0942	1.05191	-4.8428	1.28022e-06	8.12879e-06	RNY3	misc_RNA
ENSG00000215117.6	9.0174	-4.99239	0.489311	-10.2029	1.92448e-24	3.69325e-22	LINC00588	lncRNA
ENSG00000167749.11	112.704	-4.87592	0.325642	-14.9732	1.09875e-50	2.03832e-47	KLK4	protein_coding
ENSG00000140519.14	1041.07	-4.85643	0.282845	-17.1699	4.46104e-66	2.48274e-62	RHCG	protein_coding
ENSG00000265460.6	140.624	-4.82978	0.297919	-16.2118	4.16518e-59	1.23631e-55	AC015910.1	transcribed_processed_pseudogene
ENSG00000077009.13	84.3102	-4.80734	0.289593	-16.6003	6.9302e-62	2.37349e-58	NMRK2	protein_coding
ENSG00000105929.16	1140.96	-4.64182	0.275486	-16.8495	1.05759e-63	4.70872e-60	ATP6V0A4	protein_coding
ENSG00000156284.6	247.668	-4.5691	0.387782	-11.7827	4.79564e-32	2.3724e-29	CLDN8	protein_coding
ENSG00000281769.1	49.8111	-4.50661	0.371374	-12.135	6.89507e-34	4.20533e-31	LINC01230	lncRNA
ENSG00000286684.1	4.28462	-4.44729	0.678231	-6.5572	5.48276e-11	9.32425e-10	AL358976.1	lncRNA
ENSG00000173612.10	9.36531	-4.33988	0.484606	-8.95547	3.3829e-19	2.68479e-17	GPRC6A	protein_coding
ENSG00000267968.1	4.13802	-4.32466	0.556136	-7.77626	7.47019e-15	2.70403e-13	AC011523.1	lncRNA
ENSG00000110975.8	51.2017	-4.24113	0.288326	-14.7095	5.60368e-49	9.59587e-46	SYT10	protein_coding
ENSG00000260469.3	15.7335	-4.20827	0.316007	-13.317	1.84386e-40	1.86578e-37	INSYN1-AS1	lncRNA
ENSG00000287052.1	3.50587	-4.19659	0.44242	-9.48553	2.41154e-21	2.76725e-19	AC016240.1	lncRNA
ENSG00000162951.11	21.3856	-4.19217	0.379258	-11.0536	2.10558e-28	6.69621e-26	LRRTM1	protein_coding
ENSG00000258829.1	2.80667	-4.16821	0.682052	-6.11127	9.88395e-10	1.28824e-08	AC026888.1	lncRNA
ENSG00000239039.1	3.60663	-4.15715	0.484245	-8.5848	9.09927e-18	5.58916e-16	SNORD13	snoRNA
ENSG00000234979.1	6.94543	-4.06327	0.652653	-6.22578	4.79174e-10	6.70888e-09	Z82185.1	lncRNA
ENSG00000287154.1	11.6775	-4.05894	0.297364	-13.6497	2.02653e-42	2.20067e-39	AC005599.1	lncRNA
ENSG00000214128.11	714.335	-4.01764	0.276011	-14.5561	5.3423e-48	8.49483e-45	TMEM213	protein_coding
ENSG00000259937.2	6.7241	-4.00519	0.386625	-10.3594	3.7947e-25	8.00718e-23	AC023158.1	lncRNA
ENSG00000087128.10	19.6134	-3.99918	0.310171	-12.8935	4.8996e-38	4.11594e-35	TMPRSS11E	protein_coding
ENSG00000260802.1	79.2179	-3.99817	0.258765	-15.451	7.43244e-54	1.74165e-50	SERTM2	protein_coding
ENSG00000173253.15	149.008	-3.97454	0.291106	-13.6532	1.93085e-42	2.14918e-39	DMRT2	protein_coding
ENSG00000100362.13	385.421	-3.96995	0.279179	-14.2201	6.87729e-46	9.87733e-43	PVALB	protein_coding
ENSG00000152931.9	53.1291	-3.96161	0.259585	-15.2613	1.38438e-52	2.93509e-49	PART1	lncRNA
ENSG00000147614.4	466.713	-3.90685	0.246457	-15.8521	1.36e-56	3.78447e-53	ATP6V0D2	protein_coding
ENSG00000168878.19	90.0099	-3.8743	0.234085	-16.5509	1.57802e-61	5.01843e-58	SFTPB	protein_coding
ENSG00000162399.9	84.6491	-3.81718	0.338705	-11.2699	1.84734e-29	6.97025e-27	BSND	protein_coding
ENSG00000232131.1	4.00547	-3.81412	0.314044	-12.1452	6.08527e-34	3.76298e-31	NCOA7-AS1	lncRNA
ENSG00000132677.13	109.221	-3.77065	0.274311	-13.7459	5.38901e-43	6.48473e-40	RHBG	protein_coding
ENSG00000271907.1	1.4214	-3.70765	0.905728	-4.09356	4.24802e-05	0.000184936	SNORA35B	snoRNA
ENSG00000162763.4	4.26157	-3.65614	0.441779	-8.27593	1.27455e-16	6.41209e-15	LRRC52	protein_coding
ENSG00000231322.5	3.29646	-3.64007	0.375846	-9.68501	3.49181e-22	4.68271e-20	RPL13AP17	transcribed_processed_pseudogene
ENSG00000155886.11	27.0143	-3.59489	0.254742	-14.1119	3.20772e-45	4.46304e-42	SLC24A2	protein_coding
ENSG00000147606.9	442.532	-3.58849	0.201883	-17.7751	1.10252e-70	8.18124e-67	SLC26A7	protein_coding
ENSG00000273853.1	3.6973	-3.52139	0.444445	-7.92313	2.31606e-15	9.33195e-14	AC023158.2	lncRNA
ENSG00000229458.2	1.72279	-3.48205	0.521921	-6.67159	2.53043e-11	4.63821e-10	AC010157.1	lncRNA
ENSG00000242136.1	3.20987	-3.4118	0.454401	-7.50834	5.9882e-14	1.84125e-12	AC093904.2	lncRNA
ENSG00000286980.1	1.66367	-3.40431	0.577597	-5.89392	3.77143e-09	4.32995e-08	AC020584.1	lncRNA
ENSG00000159248.5	5.94883	-3.38583	0.362835	-9.33159	1.04296e-20	1.06995e-18	GJD2	protein_coding
ENSG00000286171.1	1.79221	-3.36226	0.502042	-6.69718	2.12483e-11	3.9369e-10	AC073140.1	lncRNA
ENSG00000282924.1	1.21346	-3.36222	0.678163	-4.95783	7.12832e-07	4.81815e-06	AC136428.4	unprocessed_pseudogene
ENSG00000271714.1	8.86437	-3.3508	0.35401	-9.46527	2.92804e-21	3.31718e-19	AC010501.2	lncRNA
ENSG00000131910.5	31.3459	-3.34379	0.312866	-10.6876	1.16343e-26	2.97698e-24	NR0B2	protein_coding
ENSG00000255790.6	3.70941	-3.32972	0.343716	-9.68742	3.41023e-22	4.60102e-20	AC078950.1	lncRNA
ENSG00000204655.12	11.9866	-3.30139	0.297064	-11.1134	1.07964e-28	3.64157e-26	MOG	protein_coding
ENSG00000287627.1	93.9721	-3.29424	0.218561	-15.0724	2.46033e-51	4.97914e-48	AL359704.2	lncRNA
ENSG00000228420.1	2.06039	-3.2906	0.416437	-7.9018	2.74896e-15	1.08986e-13	LINC01768	lncRNA
ENSG00000233332.1	2.5031	-3.22939	0.397314	-8.12805	4.36255e-16	1.99829e-14	AL122008.3	lncRNA
ENSG00000255480.1	2.79515	-3.22589	0.342209	-9.42666	4.23372e-21	4.67379e-19	AL353699.1	lncRNA
ENSG00000083622.8	0.960773	-3.21122	0.861199	-3.72878	0.000192409	0.000706702	AC000061.1	lncRNA
ENSG00000279537.1	2.02814	-3.16665	0.472129	-6.70717	1.9844e-11	3.69362e-10	AC020658.7	TEC
ENSG00000259241.1	1.97707	-3.15182	0.425522	-7.40695	1.29233e-13	3.73289e-12	AC020892.1	lncRNA
ENSG00000274002.1	7.59672	-3.15081	0.353255	-8.91936	4.68971e-19	3.625e-17	AL135999.3	lncRNA
ENSG00000200243.1	0.94279	-3.14391	0.773418	-4.06495	4.80418e-05	0.000206245	RN7SKP79	misc_RNA
ENSG00000197588.9	5.33762	-3.13795	0.332528	-9.43667	3.84817e-21	4.27262e-19	KLKP1	transcribed_unprocessed_pseudogene
ENSG00000241475.1	1.65012	-3.13368	0.583326	-5.3721	7.78269e-08	6.61276e-07	AL160408.4	lncRNA
ENSG00000164122.9	21.784	-3.13141	0.234964	-13.3272	1.60792e-40	1.66487e-37	ASB5	protein_coding
ENSG00000207008.1	8.52341	-3.12286	0.260293	-11.9975	3.66142e-33	1.96407e-30	SNORA54	snoRNA
ENSG00000258026.2	2.17694	-3.11359	0.323733	-9.61777	6.72767e-22	8.61432e-20	AC078955.1	lncRNA
ENSG00000168907.13	121.198	-3.10976	0.290253	-10.714	8.75119e-27	2.26529e-24	PLA2G4F	protein_coding
ENSG00000001626.16	339.103	-3.10566	0.180621	-17.1944	2.92609e-66	1.86112e-62	CFTR	protein_coding
ENSG00000177354.12	3.77406	-3.09782	0.375219	-8.25604	1.50589e-16	7.49962e-15	C10orf71	protein_coding
ENSG00000260440.3	6.14559	-3.08758	0.244383	-12.6342	1.36754e-36	1.08727e-33	LINC01544	lncRNA
ENSG00000286073.1	3.38788	-3.07702	0.417864	-7.36369	1.78897e-13	5.0126e-12	AL138900.2	unprocessed_pseudogene
ENSG00000227342.1	0.926543	-3.06752	0.932288	-3.29032	0.00100075	0.00304785	LINC00307	lncRNA
ENSG00000226087.2	6.59786	-3.06637	0.253974	-12.0735	1.45719e-33	8.46456e-31	AC073283.2	lncRNA
ENSG00000215644.10	51.6511	-3.05864	0.290539	-10.5275	6.4542e-26	1.52042e-23	GCGR	protein_coding
ENSG00000286328.1	1.91992	-3.0508	0.419545	-7.2717	3.55001e-13	9.41378e-12	AC079052.1	lncRNA
ENSG00000202241.1	0.875072	-3.02852	1.03627	-2.92253	0.00347204	0.00909166	RN7SKP186	misc_RNA
ENSG00000227243.3	1.58927	-3.02445	0.466798	-6.47915	9.22389e-11	1.50101e-09	SLAMF6P1	unprocessed_pseudogene
ENSG00000244230.3	1.45738	-3.0226	0.47011	-6.42956	1.27978e-10	2.02198e-09	RN7SL151P	misc_RNA
ENSG00000236208.1	1.85482	-3.01259	0.495252	-6.08295	1.17989e-09	1.51172e-08	C10orf71-AS1	lncRNA
ENSG00000267039.1	1.95849	-2.97429	0.33573	-8.85918	8.06085e-19	6.01161e-17	AC016493.1	lncRNA
ENSG00000287989.1	3.04641	-2.95568	0.281612	-10.4956	9.0515e-26	2.09069e-23	AL450352.1	lncRNA
ENSG00000207322.1	0.843888	-2.94769	0.786436	-3.74816	0.000178135	0.000659883	RNU1-89P	snRNA
ENSG00000243951.1	1.06532	-2.94332	0.536031	-5.49095	3.99767e-08	3.62871e-07	RN7SL308P	misc_RNA
ENSG00000146755.11	63.9838	-2.93706	0.198562	-14.7916	1.65845e-49	2.95357e-46	TRIM50	protein_coding
ENSG00000150750.8	3.64695	-2.92719	0.369323	-7.92581	2.26656e-15	9.14905e-14	C11orf53	protein_coding
ENSG00000286691.1	4.9416	-2.92245	0.254876	-11.4662	1.95128e-30	8.04413e-28	AL590009.1	lncRNA
ENSG00000233960.1	1.35777	-2.92055	0.639886	-4.56418	5.01451e-06	2.75835e-05	AC079763.1	lncRNA
ENSG00000271394.1	1.30132	-2.91953	0.475949	-6.13413	8.56274e-10	1.13396e-08	7SK	misc_RNA
ENSG00000261517.2	1.64008	-2.91939	0.428163	-6.81842	9.20467e-12	1.82592e-10	LINC00558	lncRNA
ENSG00000110680.13	15.2945	-2.91863	0.269346	-10.836	2.32474e-27	6.46903e-25	CALCA	protein_coding
ENSG00000201901.1	0.946019	-2.91846	0.651838	-4.47728	7.56018e-06	3.97362e-05	RN7SKP48	misc_RNA
ENSG00000242707.3	0.864712	-2.91605	0.602712	-4.83821	1.31013e-06	8.29507e-06	RN7SL362P	misc_RNA
ENSG00000230286.1	1.58954	-2.90607	0.50476	-5.75734	8.54511e-09	8.97297e-08	AC013472.1	lncRNA
ENSG00000142449.13	54.0187	-2.89035	0.239957	-12.0453	2.05407e-33	1.14761e-30	FBN3	protein_coding
ENSG00000104755.15	5.4436	-2.87565	0.304421	-9.44629	3.51041e-21	3.92699e-19	ADAM2	protein_coding
ENSG00000223001.1	0.748034	-2.87136	0.953486	-3.01143	0.00260016	0.00705638	RNU2-61P	snRNA
ENSG00000235026.6	6.89173	-2.85224	0.321749	-8.86481	7.66373e-19	5.74431e-17	DPP10-AS1	lncRNA
ENSG00000159763.4	22.9408	-2.83465	0.310636	-9.12532	7.15237e-20	6.3689e-18	PIP	protein_coding
ENSG00000004939.15	436.169	-2.82718	0.235067	-12.0271	2.55946e-33	1.40685e-30	SLC4A1	protein_coding
ENSG00000212443.1	27.1701	-2.81318	0.187325	-15.0177	5.62499e-51	1.08888e-47	SNORA53	snoRNA
ENSG00000109684.15	183.948	-2.80471	0.182818	-15.3415	4.03714e-53	8.98728e-50	CLNK	protein_coding
ENSG00000241233.4	17.44	-2.80228	0.202647	-13.8284	1.71759e-43	2.24918e-40	KRTAP5-8	protein_coding
ENSG00000228044.3	4.61937	-2.8	0.282023	-9.92826	3.13668e-23	5.05994e-21	AL160408.1	lncRNA
ENSG00000286188.1	0.883838	-2.78759	0.63889	-4.36317	1.28189e-05	6.36628e-05	AC023787.1	lncRNA
ENSG00000285963.1	2.51993	-2.78353	0.355689	-7.82575	5.04621e-15	1.89118e-13	AL035467.2	lncRNA
ENSG00000118434.9	1.8585	-2.77817	0.367161	-7.56663	3.83043e-14	1.22165e-12	SPACA1	protein_coding
ENSG00000255946.1	4.87093	-2.77442	0.261082	-10.6266	2.24131e-26	5.66988e-24	AC069234.1	lncRNA
ENSG00000227555.1	2.60382	-2.77349	0.326185	-8.5028	1.85069e-17	1.09137e-15	MIR4290HG	lncRNA
ENSG00000251869.1	0.790671	-2.76889	0.799102	-3.465	0.000530237	0.0017415	SCARNA23	scaRNA
ENSG00000201715.1	0.703238	-2.76803	0.925141	-2.99201	0.00277149	0.0074631	RN7SKP133	misc_RNA
ENSG00000183654.9	1.96358	-2.76768	0.447985	-6.17807	6.48883e-10	8.82414e-09	MARCHF11	protein_coding
ENSG00000239899.3	4.69643	-2.7631	0.241961	-11.4196	3.3365e-30	1.32635e-27	RN7SL674P	misc_RNA
ENSG00000267790.1	2.83265	-2.75599	0.352399	-7.82066	5.25462e-15	1.95654e-13	LINC01987	lncRNA
ENSG00000229418.2	1.35856	-2.75286	0.442404	-6.22251	4.89278e-10	6.83316e-09	AL136181.1	lncRNA
ENSG00000222414.1	1.72827	-2.74848	0.415199	-6.61968	3.59967e-11	6.34976e-10	RNU2-59P	snRNA
ENSG00000236507.2	1.69897	-2.74778	0.404584	-6.79161	1.10888e-11	2.16443e-10	BX470209.2	lncRNA
ENSG00000225683.6	4.64704	-2.74562	0.298609	-9.1947	3.76034e-20	3.5321e-18	PACRG-AS3	lncRNA
ENSG00000145087.13	15.3621	-2.73854	0.250833	-10.9178	9.4768e-28	2.79427e-25	STXBP5L	protein_coding
ENSG00000142515.15	20.5619	-2.72935	0.337546	-8.08583	6.174e-16	2.73517e-14	KLK3	protein_coding
ENSG00000265944.1	1.22187	-2.72358	0.439051	-6.20332	5.52828e-10	7.63685e-09	LINC01387	lncRNA
ENSG00000200312.1	1.15505	-2.72022	0.518454	-5.24679	1.54776e-07	1.22635e-06	RN7SKP255	misc_RNA
ENSG00000264978.2	1.16597	-2.71673	0.409427	-6.63546	3.23499e-11	5.78904e-10	RN7SL630P	misc_RNA
ENSG00000258212.1	1.05609	-2.71464	0.648847	-4.18378	2.86701e-05	0.000130359	ZNF75BP	processed_pseudogene
ENSG00000284809.1	2.01114	-2.7096	0.320501	-8.45426	2.80859e-17	1.59702e-15	AL365394.1	lncRNA
ENSG00000200959.1	4.53561	-2.70753	0.324962	-8.33185	7.95904e-17	4.17878e-15	SNORA74A	snoRNA
ENSG00000226741.2	8.28186	-2.70717	0.289039	-9.36609	7.52697e-21	7.88525e-19	LINC02554	lncRNA
ENSG00000237463.6	2.40816	-2.6958	0.455157	-5.9228	3.16498e-09	3.69563e-08	LRRC52-AS1	lncRNA
ENSG00000151365.2	59.5446	-2.6936	0.222879	-12.0855	1.2604e-33	7.48221e-31	THRSP	protein_coding
ENSG00000066032.18	16.9327	-2.6881	0.249633	-10.7682	4.86498e-27	1.29703e-24	CTNNA2	protein_coding
ENSG00000222969.1	1.24012	-2.68672	0.382069	-7.03202	2.03569e-12	4.61482e-11	RN7SKP8	misc_RNA
ENSG00000204941.14	10.5981	-2.66475	0.329002	-8.09951	5.51814e-16	2.48166e-14	PSG5	protein_coding
ENSG00000252316.1	1.26269	-2.66091	0.429131	-6.2007	5.62137e-10	7.74861e-09	RNY4	misc_RNA
ENSG00000252010.1	33.3079	-2.65666	0.217059	-12.2394	1.91541e-34	1.23594e-31	SCARNA5	scaRNA
ENSG00000116039.13	14.942	-2.65223	0.221242	-11.9879	4.11054e-33	2.17874e-30	ATP6V1B1	protein_coding
ENSG00000252906.1	1.65167	-2.6478	0.334064	-7.92605	2.26232e-15	9.14771e-14	SCARNA3	scaRNA
ENSG00000254434.1	0.983066	-2.63699	0.60688	-4.34516	1.39173e-05	6.84839e-05	AP006295.1	lncRNA
ENSG00000186458.5	1.02387	-2.6323	0.552781	-4.76193	1.91754e-06	1.16872e-05	DEFB132	protein_coding
ENSG00000222477.1	0.966732	-2.6317	0.750986	-3.50433	0.000457758	0.00152905	RNU2-23P	snRNA
ENSG00000256502.1	0.794123	-2.62904	0.94684	-2.77664	0.00549235	0.013568	AC073913.2	processed_pseudogene
ENSG00000175497.17	11.9733	-2.62008	0.268898	-9.74377	1.96133e-22	2.81692e-20	DPP10	protein_coding
ENSG00000239224.3	1.84287	-2.61893	0.352317	-7.43347	1.05786e-13	3.11915e-12	RN7SL546P	misc_RNA
ENSG00000140505.7	8.00873	-2.61853	0.279128	-9.3811	6.52884e-21	6.95415e-19	CYP1A2	protein_coding
ENSG00000278099.1	1.26974	-2.61306	0.509977	-5.12387	2.99323e-07	2.22261e-06	RNVU1-2A	snRNA
ENSG00000288542.1	1.07054	-2.61194	0.408273	-6.39754	1.57902e-10	2.44701e-09	AL133318.1	lncRNA
ENSG00000241439.1	1.28197	-2.60818	0.494369	-5.27578	1.32194e-07	1.06605e-06	AC092903.1	processed_pseudogene
ENSG00000103546.18	6.56872	-2.60668	0.292039	-8.92577	4.4261e-19	3.43316e-17	SLC6A2	protein_coding
ENSG00000225738.2	1.07275	-2.60508	0.456089	-5.71178	1.11803e-08	1.142e-07	NRG3-AS1	lncRNA
ENSG00000278701.1	0.8066	-2.60401	0.713681	-3.6487	0.000263569	0.000934285	Metazoa_SRP	misc_RNA
ENSG00000227068.1	2.04258	-2.59326	0.322703	-8.03606	9.277e-16	3.98303e-14	AL162584.1	lncRNA
ENSG00000208308.1	1.13003	-2.59108	0.413415	-6.2675	3.66883e-10	5.28119e-09	SNORA40B	snoRNA
ENSG00000275090.1	0.795718	-2.58068	0.566669	-4.55412	5.26059e-06	2.87807e-05	RN7SL296P	misc_RNA
ENSG00000225479.1	0.902606	-2.57965	0.442542	-5.82915	5.57107e-09	6.13203e-08	PLCB1-IT1	lncRNA
ENSG00000229537.7	1.32786	-2.57768	0.487971	-5.28244	1.27472e-07	1.03321e-06	LINC01739	lncRNA
ENSG00000229941.6	6.71474	-2.57497	0.258541	-9.95961	2.28961e-23	3.77556e-21	PDE11A-AS1	lncRNA
ENSG00000166558.11	4.35342	-2.56398	0.31894	-8.03906	9.05277e-16	3.89426e-14	SLC38A8	protein_coding
ENSG00000255960.1	1.32211	-2.5609	0.391794	-6.53633	6.30482e-11	1.05808e-09	AC092851.1	processed_pseudogene
ENSG00000286576.1	2.25742	-2.55772	0.287922	-8.88339	6.48505e-19	4.87726e-17	AC121334.4	lncRNA
ENSG00000253770.1	1.20453	-2.55433	0.352713	-7.24196	4.42237e-13	1.15145e-11	HMGB1P23	processed_pseudogene
ENSG00000250284.3	1.57389	-2.55232	0.421557	-6.0545	1.40858e-09	1.77009e-08	AC109439.1	lncRNA
ENSG00000145879.11	16.2239	-2.55207	0.194432	-13.1257	2.34473e-39	2.22116e-36	SPINK7	protein_coding
ENSG00000266120.1	5.3561	-2.55079	0.219913	-11.5991	4.16372e-31	1.91115e-28	AC104984.4	lncRNA
ENSG00000239946.1	1.21905	-2.54848	0.349321	-7.29554	2.97464e-13	7.99759e-12	ZBTB20-AS3	lncRNA
ENSG00000230843.1	0.824759	-2.537	0.799808	-3.17201	0.00151389	0.00438843	AL139824.1	lncRNA
ENSG00000269289.6	5.83942	-2.5366	0.274006	-9.25746	2.09344e-20	2.03953e-18	AC011503.1	lncRNA
ENSG00000279924.1	1.1231	-2.52773	0.53931	-4.68696	2.77288e-06	1.61784e-05	AL356585.4	unprocessed_pseudogene
ENSG00000278746.1	1.87437	-2.52172	0.358046	-7.043	1.88145e-12	4.30114e-11	RN7SL660P	misc_RNA
ENSG00000250866.1	1.01611	-2.515	0.501854	-5.01142	5.40306e-07	3.76346e-06	AC022424.1	lncRNA
ENSG00000233146.1	1.66079	-2.51265	0.439191	-5.72108	1.05852e-08	1.08616e-07	BPIFB5P	unitary_pseudogene
ENSG00000106302.10	7.41272	-2.50961	0.249597	-10.0546	8.76546e-24	1.53045e-21	HYAL4	protein_coding
ENSG00000251898.1	0.911685	-2.49614	0.443592	-5.62711	1.83253e-08	1.78143e-07	SCARNA11	scaRNA
ENSG00000187715.13	20.9548	-2.49496	0.204866	-12.1785	4.04584e-34	2.53708e-31	KBTBD12	protein_coding
ENSG00000276214.1	1.34483	-2.48918	0.358929	-6.93502	4.06163e-12	8.66072e-11	AC008833.1	processed_pseudogene
ENSG00000266439.2	0.81071	-2.48889	0.474367	-5.24676	1.54799e-07	1.22635e-06	RN7SL493P	misc_RNA
ENSG00000276359.1	0.666102	-2.46805	0.653745	-3.77525	0.000159846	0.00059911	Metazoa_SRP	misc_RNA
ENSG00000184908.18	434.094	-2.45723	0.21784	-11.28	1.64827e-29	6.27228e-27	CLCNKB	protein_coding
ENSG00000147571.5	2.38682	-2.45575	0.358625	-6.84767	7.50633e-12	1.51911e-10	CRH	protein_coding
ENSG00000274618.2	1.55706	-2.45231	0.369991	-6.62803	3.40207e-11	6.05156e-10	H4C6	protein_coding
ENSG00000212402.1	10.0045	-2.45054	0.220399	-11.1187	1.018e-28	3.45988e-26	SNORA74B	snoRNA
ENSG00000219159.4	1.43531	-2.44848	0.40023	-6.11769	9.49404e-10	1.24215e-08	AC011298.1	lncRNA
ENSG00000201321.1	0.638822	-2.44287	0.93743	-2.60592	0.00916274	0.0212199	RNA5S9	rRNA
ENSG00000226186.1	3.19512	-2.44279	0.273638	-8.92707	4.37452e-19	3.40011e-17	ELOCP21	processed_pseudogene
ENSG00000236556.1	1.12413	-2.43961	0.393581	-6.19849	5.70089e-10	7.84608e-09	AC025038.1	lncRNA
ENSG00000200047.1	0.724578	-2.43309	0.52488	-4.63551	3.56052e-06	2.01994e-05	RN7SKP115	misc_RNA
ENSG00000281186.1	7.60271	-2.42915	0.25512	-9.52162	1.70505e-21	2.01364e-19	LINC00706	lncRNA
ENSG00000272412.2	1.29994	-2.42805	0.406842	-5.96805	2.40112e-09	2.87922e-08	RN7SL778P	misc_RNA
ENSG00000201428.1	0.942394	-2.42615	0.441718	-5.49254	3.96193e-08	3.59774e-07	RN7SKP71	misc_RNA
ENSG00000287301.1	2.00083	-2.42511	0.362391	-6.69195	2.20211e-11	4.06823e-10	AC068075.2	lncRNA
ENSG00000101349.17	4.89286	-2.42488	0.323981	-7.48463	7.17517e-14	2.17612e-12	PAK5	protein_coding
ENSG00000266187.2	0.650306	-2.42458	0.61416	-3.94779	7.88752e-05	0.000320241	RN7SL480P	misc_RNA
ENSG00000265128.1	0.938768	-2.42135	0.398703	-6.07306	1.25493e-09	1.59274e-08	AC016866.2	lncRNA
ENSG00000241665.3	1.03987	-2.41739	0.351532	-6.87674	6.12381e-12	1.26227e-10	RN7SL418P	misc_RNA
ENSG00000107447.8	6.28924	-2.41393	0.306083	-7.88652	3.10737e-15	1.21894e-13	DNTT	protein_coding
ENSG00000256315.1	0.777329	-2.41082	0.602553	-4.001	6.30754e-05	0.000262252	AP000462.2	lncRNA
ENSG00000286212.2	36.196	-2.40663	0.186455	-12.9073	4.09361e-38	3.57372e-35	AC097654.1	lncRNA
ENSG00000147613.8	1.06647	-2.4046	0.40196	-5.98219	2.2016e-09	2.67089e-08	PSKH2	protein_coding
ENSG00000271945.2	2.57015	-2.40015	0.266497	-9.00629	2.1314e-19	1.77046e-17	AL355612.1	lncRNA
ENSG00000242493.3	1.92956	-2.39934	0.320652	-7.4827	7.28086e-14	2.20371e-12	RN7SL37P	misc_RNA
ENSG00000261104.1	4.3787	-2.39696	0.324981	-7.37571	1.63477e-13	4.62715e-12	AC093904.4	lncRNA
ENSG00000172551.11	6.67276	-2.38441	0.283317	-8.41604	3.89419e-17	2.1809e-15	MUCL1	protein_coding
ENSG00000109182.12	101.35	-2.3822	0.230182	-10.3492	4.2198e-25	8.82057e-23	CWH43	protein_coding
ENSG00000198099.9	17.3236	-2.38136	0.259915	-9.16206	5.09155e-20	4.71291e-18	ADH4	protein_coding
ENSG00000260268.6	1.17981	-2.37338	0.74518	-3.18497	0.0014477	0.00422025	LINC00919	lncRNA
ENSG00000270900.1	0.633396	-2.37128	0.605406	-3.91684	8.97183e-05	0.000359166	NUDT19P4	processed_pseudogene
ENSG00000263312.1	2.20302	-2.36557	0.310323	-7.62293	2.47984e-14	8.16641e-13	LINC01975	lncRNA
ENSG00000202071.1	0.73627	-2.36373	0.567587	-4.16452	3.1201e-05	0.000140575	Y_RNA	misc_RNA
ENSG00000215262.8	3.37182	-2.36201	0.337807	-6.99219	2.70636e-12	6.00076e-11	KCNU1	protein_coding
ENSG00000276168.1	3306.97	-2.35713	0.17055	-13.8207	1.9115e-43	2.43159e-40	RN7SL1	misc_RNA
ENSG00000243424.2	0.838218	-2.34812	0.538599	-4.35968	1.30254e-05	6.4609e-05	RN7SL107P	misc_RNA
ENSG00000197061.5	11.8169	-2.34084	0.176863	-13.2353	5.48917e-40	5.43099e-37	H4C3	protein_coding
ENSG00000200665.1	1.20373	-2.3308	0.410386	-5.67953	1.35062e-08	1.35158e-07	RNU6-1188P	snRNA
ENSG00000201315.1	0.702811	-2.33028	0.796536	-2.92552	0.00343883	0.00901585	RN7SKP227	misc_RNA
ENSG00000243227.3	1.09504	-2.32906	0.42974	-5.4197	5.96982e-08	5.20655e-07	RN7SL55P	misc_RNA
ENSG00000214998.2	1.77287	-2.32254	0.268508	-8.64979	5.15931e-18	3.28154e-16	CCNB2P1	processed_pseudogene
ENSG00000118271.12	65.2739	-2.32173	0.289281	-8.02585	1.00824e-15	4.31218e-14	TTR	protein_coding
ENSG00000035720.8	138.422	-2.3217	0.183172	-12.675	8.13873e-37	6.58837e-34	STAP1	protein_coding
ENSG00000267354.1	2.02738	-2.31641	0.349951	-6.61926	3.61007e-11	6.36559e-10	AC091151.2	lncRNA
ENSG00000267134.3	1.72133	-2.3073	0.360095	-6.40746	1.47961e-10	2.3058e-09	LINC01924	lncRNA
ENSG00000272411.1	3.4633	-2.30658	0.228421	-10.0979	5.64338e-24	1.00504e-21	AC116312.1	lncRNA
ENSG00000163394.6	3.30415	-2.30557	0.385494	-5.98083	2.22008e-09	2.69038e-08	CCKAR	protein_coding
ENSG00000277918.1	0.803561	-2.304	0.512319	-4.49719	6.88567e-06	3.65652e-05	RNVU1-28	snRNA
ENSG00000202512.1	1.20439	-2.30233	0.339612	-6.77928	1.20779e-11	2.33903e-10	RN7SKP230	misc_RNA
ENSG00000253959.1	1.54581	-2.30132	0.336317	-6.84273	7.76997e-12	1.56606e-10	LINC01863	lncRNA
ENSG00000200176.1	0.691879	-2.30117	0.590222	-3.89882	9.66641e-05	0.000383649	RNU1-19P	snRNA
ENSG00000224984.1	1.97108	-2.29883	0.477571	-4.81359	1.4824e-06	9.27759e-06	AL512363.1	lncRNA
ENSG00000252213.1	1.57258	-2.29802	0.382593	-6.00643	1.89657e-09	2.32748e-08	SNORA74D	snoRNA
ENSG00000256362.2	0.776661	-2.29751	0.647411	-3.54876	0.000387054	0.0013182	LINC02375	lncRNA
ENSG00000102678.7	82.5156	-2.29654	0.249635	-9.19962	3.59218e-20	3.38845e-18	FGF9	protein_coding
ENSG00000206596.1	0.969029	-2.29335	0.448699	-5.1111	3.20288e-07	2.36174e-06	RNU1-27P	snRNA
ENSG00000274244.1	2.59951	-2.2913	0.272563	-8.40648	4.2251e-17	2.34556e-15	AC243585.1	lncRNA
ENSG00000242976.3	0.532278	-2.28197	0.856894	-2.66307	0.00774322	0.0183038	RN7SL177P	misc_RNA
ENSG00000184012.13	288.112	-2.27776	0.206906	-11.0087	3.47154e-28	1.07336e-25	TMPRSS2	protein_coding
ENSG00000200488.1	4.35292	-2.27687	0.306465	-7.42946	1.09046e-13	3.20134e-12	RN7SKP203	misc_RNA
ENSG00000200105.1	0.702775	-2.27563	0.377575	-6.02697	1.67065e-09	2.07656e-08	RNU6-251P	snRNA
ENSG00000265942.2	1.08173	-2.27494	0.322223	-7.06014	1.66336e-12	3.83322e-11	RN7SL577P	misc_RNA
ENSG00000286843.1	0.708737	-2.26371	0.424759	-5.32939	9.85407e-08	8.18783e-07	AL160159.1	lncRNA
ENSG00000286473.1	1.6386	-2.26023	0.309449	-7.30405	2.79225e-13	7.55282e-12	AC133485.7	lncRNA
ENSG00000230435.1	1.22167	-2.25677	0.281357	-8.02103	1.04863e-15	4.45922e-14	AC004160.2	lncRNA
ENSG00000207827.1	0.508862	-2.25477	0.852013	-2.6464	0.00813526	0.0191188	MIR30A	miRNA
ENSG00000226159.2	0.754042	-2.24534	0.485093	-4.62868	3.6801e-06	2.08036e-05	LINC01375	lncRNA
ENSG00000285633.1	0.849998	-2.23438	0.522792	-4.27394	1.92048e-05	9.12157e-05	AL132633.1	lncRNA
ENSG00000201533.1	2.01987	-2.23271	0.280824	-7.95058	1.85645e-15	7.61094e-14	RN7SKP237	misc_RNA
ENSG00000287943.1	2.41719	-2.22884	0.274776	-8.11149	5.00022e-16	2.26245e-14	AC091151.7	lncRNA
ENSG00000243446.3	1.12484	-2.22823	0.419655	-5.30965	1.09833e-07	9.01734e-07	RN7SL284P	misc_RNA
ENSG00000212232.1	70.3158	-2.22677	0.162743	-13.6828	1.2868e-42	1.46904e-39	SNORD17	snoRNA
ENSG00000135346.9	5.63626	-2.22369	0.290518	-7.65421	1.94507e-14	6.53586e-13	CGA	protein_coding
ENSG00000278818.1	2.07136	-2.22333	0.280622	-7.92287	2.32083e-15	9.34272e-14	Metazoa_SRP	misc_RNA
ENSG00000287516.1	10.2464	-2.22308	0.235439	-9.44231	3.64665e-21	4.06917e-19	AL359764.2	lncRNA
ENSG00000226926.7	2.3951	-2.22149	0.274996	-8.07826	6.56958e-16	2.89619e-14	PDZPH1P	transcribed_unitary_pseudogene
ENSG00000241546.1	0.668434	-2.21503	0.526599	-4.2063	2.59586e-05	0.000119297	AC092910.2	processed_pseudogene
ENSG00000279819.1	0.857018	-2.21215	0.424034	-5.21691	1.81935e-07	1.42011e-06	AL390318.1	TEC
ENSG00000235361.1	1.10202	-2.20403	0.355763	-6.19522	5.82032e-10	7.9923e-09	AC016292.1	lncRNA
ENSG00000223721.3	1.51826	-2.20216	0.419164	-5.25368	1.49089e-07	1.18618e-06	UQCRFS1P2	processed_pseudogene
ENSG00000207344.1	1.57081	-2.20006	0.272348	-8.07812	6.57742e-16	2.8966e-14	SNORA22C	snoRNA
ENSG00000268659.2	0.9799	-2.19412	0.351039	-6.25036	4.09509e-10	5.82138e-09	AL589863.1	lncRNA
ENSG00000183888.4	4.43394	-2.19359	0.24223	-9.05579	1.35586e-19	1.16314e-17	SRARP	protein_coding
ENSG00000206588.1	0.586382	-2.19105	0.67596	-3.2414	0.00118945	0.00355327	RNU1-28P	snRNA
ENSG00000226397.8	4.6643	-2.18594	0.284969	-7.67079	1.70946e-14	5.82773e-13	C12orf77	lncRNA
ENSG00000255043.1	0.740155	-2.18298	0.405264	-5.38655	7.18225e-08	6.14008e-07	NAV2-AS5	lncRNA
ENSG00000171759.10	1911.23	-2.18065	0.206013	-10.585	3.49731e-26	8.55554e-24	PAH	protein_coding
ENSG00000243872.3	0.624369	-2.18014	0.719817	-3.02875	0.00245569	0.00671877	RN7SL464P	misc_RNA
ENSG00000196228.3	1.464	-2.17881	0.290288	-7.50568	6.11091e-14	1.87509e-12	SULT1C3	protein_coding
ENSG00000266828.2	0.502975	-2.17302	0.921317	-2.3586	0.0183442	0.0386824	RN7SL712P	misc_RNA
ENSG00000256481.1	1.20668	-2.1696	0.315344	-6.88009	5.98153e-12	1.23466e-10	AP006333.2	lncRNA
ENSG00000258928.1	0.981801	-2.16906	0.378131	-5.73626	9.67896e-09	1.00264e-07	AL358333.2	lncRNA
ENSG00000228521.2	0.678964	-2.16785	0.699629	-3.09857	0.00194458	0.0054748	AC099552.3	lncRNA
ENSG00000238554.1	0.934686	-2.16063	0.389645	-5.54512	2.93753e-08	2.74073e-07	RNU1-88P	snRNA
ENSG00000206779.1	0.735047	-2.15659	0.480856	-4.4849	7.29497e-06	3.8469e-05	Y_RNA	misc_RNA
ENSG00000266477.2	0.874441	-2.15458	0.548098	-3.93101	8.45908e-05	0.000340867	RN7SL616P	misc_RNA
ENSG00000100078.4	2.48062	-2.15367	0.325056	-6.62553	3.46007e-11	6.13512e-10	PLA2G3	protein_coding
ENSG00000187054.16	4.21719	-2.15268	0.233965	-9.20083	3.5518e-20	3.35747e-18	TMPRSS11A	protein_coding
ENSG00000201028.1	1.46552	-2.14478	0.332598	-6.44856	1.12917e-10	1.80128e-09	RNU6-151P	snRNA
ENSG00000200792.1	0.902917	-2.13714	0.445118	-4.8013	1.57642e-06	9.79171e-06	SNORA80A	snoRNA
ENSG00000284631.1	1.47477	-2.12732	0.36773	-5.78501	7.25084e-09	7.76778e-08	SCYGR4	protein_coding
ENSG00000240183.3	1.7984	-2.12501	0.32294	-6.58019	4.69832e-11	8.0901e-10	RN7SL297P	misc_RNA
ENSG00000230575.1	0.572282	-2.12495	0.570696	-3.72344	0.000196529	0.000719932	AC013286.1	lncRNA
ENSG00000284640.1	8.17247	-2.12165	0.2183	-9.71898	2.50272e-22	3.50545e-20	AL590434.1	lncRNA
ENSG00000187855.5	4.02593	-2.11514	0.22029	-9.60163	7.86872e-22	9.95281e-20	ASCL4	protein_coding
ENSG00000222467.1	0.543773	-2.11367	0.590006	-3.58245	0.000340382	0.00117598	Y_RNA	misc_RNA
ENSG00000243911.3	0.777451	-2.11101	0.428143	-4.93062	8.19683e-07	5.46242e-06	RN7SL430P	misc_RNA
ENSG00000124610.5	1.01426	-2.11025	0.340624	-6.19526	5.819e-10	7.9923e-09	H1-1	protein_coding
ENSG00000241172.3	1.17951	-2.10991	0.351922	-5.99539	2.02995e-09	2.47954e-08	RN7SL70P	misc_RNA
ENSG00000263616.2	0.813858	-2.10964	0.575943	-3.66294	0.000249336	0.000890161	RN7SL178P	misc_RNA
ENSG00000113073.15	32.2514	-2.10689	0.205799	-10.2376	1.34504e-24	2.64979e-22	SLC4A9	protein_coding
ENSG00000201358.1	0.855299	-2.10563	0.452501	-4.65331	3.26643e-06	1.87122e-05	RN7SKP193	misc_RNA
ENSG00000280115.1	0.970462	-2.10544	0.422834	-4.97936	6.37962e-07	4.36514e-06	AC136603.1	TEC
ENSG00000238825.1	0.860395	-2.10541	0.383686	-5.48734	4.08035e-08	3.69794e-07	RNVU1-2	snRNA
ENSG00000256120.2	2.81875	-2.10408	0.323194	-6.51028	7.50132e-11	1.23972e-09	SOX5-AS1	lncRNA
ENSG00000156096.14	10.1961	-2.10258	0.273122	-7.6983	1.37885e-14	4.77378e-13	UGT2B4	protein_coding
ENSG00000265316.1	1.3167	-2.09724	0.325799	-6.43721	1.21687e-10	1.92808e-09	AP005059.2	lncRNA
ENSG00000251655.6	0.712274	-2.09333	0.475081	-4.40625	1.05174e-05	5.34186e-05	PRB1	protein_coding
ENSG00000112530.11	166.767	-2.09303	0.152355	-13.7378	6.02743e-43	7.06209e-40	PACRG	protein_coding
ENSG00000222445.1	0.856722	-2.09212	0.343427	-6.09189	1.11583e-09	1.43834e-08	RN7SKP56	misc_RNA
ENSG00000222293.1	0.950467	-2.09176	0.485389	-4.30946	1.63654e-05	7.91395e-05	RNU2-36P	snRNA
ENSG00000287338.1	43.6663	-2.08948	0.173068	-12.0732	1.4639e-33	8.46456e-31	AL929091.1	lncRNA
ENSG00000230902.1	0.643285	-2.08444	0.470599	-4.42933	9.45255e-06	4.85192e-05	FAM204CP	processed_pseudogene
ENSG00000131951.11	10.4513	-2.08	0.217955	-9.54326	1.38413e-21	1.66106e-19	LRRC9	protein_coding
ENSG00000258553.5	4.19038	-2.07644	0.192781	-10.771	4.71978e-27	1.2659e-24	AL157911.1	lncRNA
ENSG00000270285.1	0.856697	-2.07448	0.399344	-5.19472	2.05024e-07	1.58175e-06	AC124916.2	processed_pseudogene
ENSG00000252283.1	0.676557	-2.0716	0.545521	-3.79748	0.000146176	0.00055337	Vault	misc_RNA
ENSG00000252707.1	0.838673	-2.06973	0.402181	-5.14627	2.65719e-07	1.99808e-06	RNU11-2P	snRNA
ENSG00000270739.1	2.94998	-2.06456	0.244398	-8.44753	2.97539e-17	1.68113e-15	AC090953.1	processed_pseudogene
ENSG00000233729.1	1.29273	-2.05826	0.280359	-7.34154	2.11144e-13	5.83535e-12	NCKAP5-AS1	lncRNA
ENSG00000248813.1	1.15475	-2.05667	0.346324	-5.93858	2.87502e-09	3.38547e-08	AC022447.3	lncRNA
ENSG00000241406.3	0.881565	-2.05385	0.480175	-4.2773	1.89176e-05	8.99857e-05	RN7SL515P	misc_RNA
ENSG00000104112.9	36.2836	-2.05206	0.175428	-11.6974	1.31402e-31	6.35914e-29	SCG3	protein_coding
ENSG00000221102.1	0.845207	-2.0498	0.420374	-4.87614	1.08184e-06	6.98273e-06	SNORA11B	snoRNA
ENSG00000229339.1	0.81854	-2.04965	0.46438	-4.41372	1.01608e-05	5.17728e-05	AC093414.1	processed_pseudogene
ENSG00000252627.1	1.00685	-2.04929	0.357994	-5.72439	1.03809e-08	1.06864e-07	RNU6-122P	snRNA
ENSG00000263642.1	0.824358	-2.04846	0.360379	-5.68418	1.3144e-08	1.31982e-07	MIR4802	miRNA
ENSG00000271736.2	4.01805	-2.04647	0.313826	-6.52104	6.98198e-11	1.16122e-09	LINC02772	lncRNA
ENSG00000287897.1	0.563186	-2.04428	0.543439	-3.76175	0.000168726	0.000629003	AP000465.1	lncRNA
ENSG00000255555.1	0.60108	-2.04212	0.449714	-4.54093	5.60069e-06	3.04543e-05	AP000857.2	lncRNA
ENSG00000243845.3	0.836559	-2.03972	0.367667	-5.54774	2.89387e-08	2.70794e-07	RN7SL30P	misc_RNA
ENSG00000143355.16	23.4441	-2.03731	0.299787	-6.79587	1.07663e-11	2.10795e-10	LHX9	protein_coding
ENSG00000243704.3	1.67469	-2.03713	0.284424	-7.16232	7.93238e-13	1.94158e-11	RN7SL105P	misc_RNA
ENSG00000251001.1	1.41734	-2.03573	0.294289	-6.91744	4.59887e-12	9.69946e-11	AC026427.2	processed_pseudogene
ENSG00000265477.1	0.874673	-2.03494	0.40809	-4.98649	6.1485e-07	4.22664e-06	AP000915.2	lncRNA
ENSG00000244541.6	9.47304	-2.03353	0.197293	-10.3072	6.53897e-25	1.34163e-22	LINC01213	lncRNA
ENSG00000251149.1	0.469956	-2.03273	0.872865	-2.3288	0.0198697	0.0413953	MTND5P5	processed_pseudogene
ENSG00000207091.1	0.877383	-2.03202	0.345912	-5.87438	4.2444e-09	4.81093e-08	Y_RNA	misc_RNA
ENSG00000207583.1	0.968199	-2.02999	0.348832	-5.81938	5.90648e-09	6.46923e-08	MIR606	miRNA
ENSG00000253154.2	4.9104	-2.0294	0.226674	-8.95293	3.46178e-19	2.73764e-17	AC100801.1	lncRNA
ENSG00000206737.1	0.58909	-2.02746	0.645664	-3.14012	0.00168878	0.00482695	RNVU1-18	snRNA
ENSG00000283176.1	1.14655	-2.02651	0.334604	-6.05644	1.39168e-09	1.75182e-08	AC103706.2	processed_pseudogene
ENSG00000165694.10	5.89396	-2.02603	0.294695	-6.87499	6.19955e-12	1.2767e-10	FRMD7	protein_coding
ENSG00000264434.2	0.538302	-2.02396	0.592154	-3.41797	0.000630909	0.0020308	AC110603.1	lncRNA
ENSG00000121335.12	0.971341	-2.0227	0.400431	-5.05132	4.38774e-07	3.12919e-06	PRB2	protein_coding
ENSG00000287969.1	3.14105	-2.02076	0.231203	-8.74023	2.32633e-18	1.59346e-16	AL355474.1	lncRNA
ENSG00000243550.3	2.38185	-2.02031	0.328022	-6.15905	7.31807e-10	9.85846e-09	LINC01214	lncRNA
ENSG00000234303.3	1.10126	-2.01802	0.343458	-5.87559	4.21336e-09	4.78062e-08	CLYBL-AS1	lncRNA
ENSG00000285691.2	1.10869	-2.01757	0.370539	-5.44496	5.18178e-08	4.58665e-07	AL445259.1	lncRNA
ENSG00000242510.1	1.20651	-2.01546	0.349696	-5.76345	8.24094e-09	8.69665e-08	NDUFB4P1	processed_pseudogene
ENSG00000185352.8	108.836	-2.0153	0.196941	-10.233	1.4106e-24	2.7667e-22	HS6ST3	protein_coding
ENSG00000267743.5	0.899036	-2.01526	0.303808	-6.63332	3.28229e-11	5.85956e-10	AC107896.1	lncRNA
ENSG00000226545.1	1.67519	-2.01401	0.270375	-7.44895	9.40878e-14	2.79644e-12	AL357552.1	unprocessed_pseudogene
ENSG00000258380.1	0.96487	-2.01055	0.315035	-6.382	1.74788e-10	2.68625e-09	AL356805.1	lncRNA
ENSG00000257084.1	6.71463	-2.01009	0.372317	-5.39887	6.70629e-08	5.77644e-07	MIR200CHG	lncRNA
ENSG00000244642.3	3.59797	-2.00919	0.226816	-8.85824	8.12874e-19	6.05211e-17	RN7SL396P	misc_RNA
ENSG00000176040.13	4.37673	-2.00763	0.286811	-6.99982	2.5629e-12	5.71111e-11	TMPRSS7	protein_coding
ENSG00000260710.1	7.52537	-2.00621	0.236283	-8.49072	2.05362e-17	1.19834e-15	AC120498.4	lncRNA
ENSG00000267038.1	0.557872	-2.00211	0.601907	-3.32628	0.000880146	0.00272299	AC105094.1	lncRNA
ENSG00000284638.1	2.52726	-2.00122	0.304719	-6.56742	5.11944e-11	8.74982e-10	AC005551.1	protein_coding
ENSG00000185290.4	18.376	-2.00104	0.307897	-6.49905	8.08274e-11	1.32842e-09	NUPR2	protein_coding
ENSG00000226047.1	0.603805	-1.99801	0.653767	-3.05615	0.00224202	0.00620357	AL807761.3	lncRNA
ENSG00000228568.1	0.650299	-1.99672	0.452525	-4.41239	1.02234e-05	5.20618e-05	RPS15AP13	processed_pseudogene
ENSG00000244402.3	0.425052	-1.99127	0.877624	-2.26893	0.0232727	0.0473612	RN7SL314P	misc_RNA
ENSG00000285239.1	1.46112	-1.99016	0.344723	-5.77322	7.77719e-09	8.268e-08	AL137789.2	lncRNA
ENSG00000110245.12	44.984	-1.98885	0.29268	-6.79529	1.08096e-11	2.11365e-10	APOC3	protein_coding
ENSG00000283235.2	4.30318	-1.98839	0.321333	-6.18795	6.09506e-10	8.3396e-09	AC139493.2	lncRNA
ENSG00000207313.1	1.61427	-1.98696	0.245204	-8.10328	5.34988e-16	2.40842e-14	SNORA2B	snoRNA
ENSG00000275194.1	0.614685	-1.98091	0.427696	-4.63158	3.62892e-06	2.0556e-05	AC004467.1	unprocessed_pseudogene
ENSG00000214283.4	2.72869	-1.9803	0.307109	-6.44819	1.1319e-10	1.80436e-09	RAD51AP1P1	processed_pseudogene
ENSG00000241198.3	0.443059	-1.97817	1.07117	-1.84674	0.0647846	0.113555	RN7SL191P	misc_RNA
ENSG00000278234.1	0.70771	-1.9777	0.358108	-5.52263	3.33961e-08	3.08037e-07	U2	snRNA
ENSG00000226541.1	0.66193	-1.97749	0.441765	-4.47633	7.59369e-06	3.98931e-05	AL359633.1	processed_pseudogene
ENSG00000258740.1	0.693122	-1.97306	0.477668	-4.13062	3.61794e-05	0.000160312	AL691403.1	lncRNA
ENSG00000244677.3	0.675335	-1.97286	0.476863	-4.13716	3.51634e-05	0.000156324	RN7SL706P	misc_RNA
ENSG00000187889.13	133.801	-1.9728	0.169279	-11.6541	2.18637e-31	1.02467e-28	FYB2	protein_coding
ENSG00000206605.1	0.828681	-1.97233	0.409674	-4.81438	1.47657e-06	9.24501e-06	RNU6-946P	snRNA
ENSG00000206702.1	2.29887	-1.97211	0.319344	-6.17551	6.59501e-10	8.96032e-09	RNU1-11P	snRNA
ENSG00000250189.2	2.29038	-1.97166	0.300923	-6.55203	5.67605e-11	9.62724e-10	AC097504.1	processed_pseudogene
ENSG00000158874.11	12.9314	-1.96956	0.240485	-8.18997	2.61281e-16	1.24551e-14	APOA2	protein_coding
ENSG00000257986.3	0.778255	-1.96781	0.464076	-4.24028	2.23244e-05	0.000104319	LINC02306	lncRNA
ENSG00000228723.6	1.1052	-1.967	0.400223	-4.91475	8.88971e-07	5.85931e-06	SRGAP3-AS2	lncRNA
ENSG00000257588.1	2.38468	-1.9664	0.382976	-5.13453	2.82855e-07	2.11266e-06	AC025154.2	lncRNA
ENSG00000258837.1	4.99467	-1.96638	0.314281	-6.25676	3.93064e-10	5.6109e-09	AL133370.1	lncRNA
ENSG00000230986.1	0.9556	-1.96487	0.322885	-6.08535	1.16239e-09	1.49188e-08	DDX3P2	processed_pseudogene
ENSG00000244356.3	1.62727	-1.96455	0.284418	-6.90727	4.94085e-12	1.03355e-10	RN7SL398P	misc_RNA
ENSG00000224652.2	12.3417	-1.96131	0.226142	-8.67291	4.21201e-18	2.74283e-16	LINC00885	lncRNA
ENSG00000272477.1	0.771555	-1.9581	0.431526	-4.53762	5.68927e-06	3.08536e-05	AC144521.1	lncRNA
ENSG00000272197.2	1.77497	-1.95774	0.252388	-7.75687	8.70488e-15	3.11049e-13	RN7SL803P	misc_RNA
ENSG00000244091.1	0.970108	-1.95768	0.404265	-4.84256	1.28178e-06	8.1364e-06	RN7SL483P	misc_RNA
ENSG00000228219.1	1.96883	-1.95723	0.244078	-8.01889	1.06706e-15	4.53328e-14	NPM1P30	processed_pseudogene
ENSG00000240481.3	0.483359	-1.95661	1.04993	-1.86356	0.0623834	0.11	RN7SL38P	misc_RNA
ENSG00000243313.2	1.3936	-1.95626	0.307028	-6.37159	1.87076e-10	2.85637e-09	RN7SL285P	misc_RNA
ENSG00000239396.3	0.601072	-1.95578	0.546556	-3.57837	0.000345745	0.00119238	RN7SL414P	misc_RNA
ENSG00000242256.3	1.16578	-1.95541	0.352153	-5.55273	2.81246e-08	2.63842e-07	RN7SL57P	misc_RNA
ENSG00000234675.1	0.618974	-1.95487	0.432136	-4.52374	6.07572e-06	3.26985e-05	AL445123.1	lncRNA
ENSG00000248935.1	0.519689	-1.95284	0.464463	-4.2045	2.61663e-05	0.000120141	AC034234.1	lncRNA
ENSG00000286581.1	1.15343	-1.94962	0.367182	-5.30967	1.09823e-07	9.01734e-07	AL450992.3	lncRNA
ENSG00000210176.1	0.721084	-1.94793	0.352842	-5.52068	3.37693e-08	3.11221e-07	MT-TH	Mt_tRNA
ENSG00000243373.3	0.590068	-1.94454	0.452362	-4.29863	1.71855e-05	8.26387e-05	RN7SL173P	misc_RNA
ENSG00000237986.4	1.67226	-1.94389	0.326902	-5.94639	2.74127e-09	3.24255e-08	CELF2-AS2	lncRNA
ENSG00000258980.1	1.01835	-1.94286	0.457915	-4.24283	2.20715e-05	0.000103289	EIF1AXP2	processed_pseudogene
ENSG00000267393.1	1.27246	-1.94078	0.312819	-6.20418	5.49843e-10	7.60033e-09	AP002439.1	lncRNA
ENSG00000201210.1	0.494325	-1.93699	0.779586	-2.48464	0.0129684	0.0286727	RNA5SP139	rRNA_pseudogene
ENSG00000239748.3	0.487167	-1.93672	1.02445	-1.89049	0.0586929	0.104565	RN7SL795P	misc_RNA
ENSG00000241159.3	1.19577	-1.9348	0.296216	-6.53173	6.50146e-11	1.08699e-09	RN7SL160P	misc_RNA
ENSG00000286278.1	0.499338	-1.93377	0.679165	-2.84728	0.00440943	0.0112009	AL136096.1	lncRNA
ENSG00000201364.1	0.614666	-1.93111	0.59106	-3.2672	0.00108616	0.00327944	RN7SKP37	misc_RNA
ENSG00000140459.18	86.5637	-1.92859	0.2518	-7.65923	1.87058e-14	6.30937e-13	CYP11A1	protein_coding
ENSG00000279295.1	0.930352	-1.92765	0.28259	-6.82136	9.01839e-12	1.79093e-10	AP001541.1	TEC
ENSG00000278215.1	0.810284	-1.92593	0.443597	-4.34162	1.41434e-05	6.94809e-05	AP001318.3	processed_pseudogene
ENSG00000234915.1	1.43036	-1.92586	0.317129	-6.07279	1.25705e-09	1.59498e-08	AL360091.3	lncRNA
ENSG00000237249.1	1.82942	-1.92438	0.315001	-6.10912	1.00182e-09	1.30383e-08	Z99127.2	processed_pseudogene
ENSG00000241884.2	1.1919	-1.92351	0.293598	-6.55152	5.69538e-11	9.65633e-10	AC114401.1	lncRNA
ENSG00000228791.8	21.2666	-1.92267	0.144091	-13.3435	1.29277e-40	1.37043e-37	THRB-AS1	lncRNA
ENSG00000167346.7	1.60876	-1.91941	0.334321	-5.74121	9.39998e-09	9.7647e-08	MMP26	protein_coding
ENSG00000258490.1	2.06873	-1.91763	0.267295	-7.17422	7.27192e-13	1.79526e-11	AL049835.1	lncRNA
ENSG00000207086.1	0.798509	-1.91275	0.389075	-4.91614	8.82675e-07	5.82126e-06	Y_RNA	misc_RNA
ENSG00000253165.1	0.438802	-1.91232	0.872513	-2.19173	0.0283988	0.056273	AC090821.2	lncRNA
ENSG00000235784.2	1.11534	-1.9103	0.311211	-6.13828	8.34193e-10	1.10703e-08	HNRNPA1P29	processed_pseudogene
ENSG00000272469.2	1.07175	-1.90952	0.353401	-5.40327	6.54363e-08	5.64945e-07	RN7SL760P	misc_RNA
ENSG00000227573.2	0.560298	-1.90683	0.431718	-4.41685	1.00151e-05	5.11358e-05	AC004986.1	processed_pseudogene
ENSG00000113889.14	108.78	-1.90669	0.250154	-7.62204	2.49697e-14	8.21674e-13	KNG1	protein_coding
ENSG00000240235.3	1.34332	-1.90503	0.325333	-5.85562	4.75237e-09	5.31099e-08	RN7SL794P	misc_RNA
ENSG00000267683.1	7.85187	-1.90367	0.200098	-9.51368	1.84033e-21	2.16193e-19	AC008991.1	lncRNA
ENSG00000227658.1	0.571342	-1.90339	0.398176	-4.78029	1.75047e-06	1.07483e-05	AC005160.1	lncRNA
ENSG00000286559.1	1.38582	-1.90252	0.303421	-6.27024	3.60503e-10	5.20618e-09	AC099845.1	lncRNA
ENSG00000225505.1	1.99273	-1.89935	0.299107	-6.35007	2.15211e-10	3.25028e-09	AC104332.1	processed_pseudogene
ENSG00000273768.1	1.40712	-1.89751	0.239108	-7.9358	2.09141e-15	8.50373e-14	RNVU1-29	snRNA
ENSG00000278928.1	1.13593	-1.89453	0.380744	-4.97586	6.49595e-07	4.43996e-06	AC136621.1	TEC
ENSG00000224451.2	1.31285	-1.89332	0.30079	-6.2945	3.08398e-10	4.51523e-09	ATP5PBP1	processed_pseudogene
ENSG00000261432.1	0.653181	-1.89021	0.427603	-4.42047	9.8486e-06	5.03605e-05	LINC01613	lncRNA
ENSG00000251791.1	23.9351	-1.88993	0.180902	-10.4473	1.50833e-25	3.35777e-23	SCARNA6	scaRNA
ENSG00000260601.1	5.26572	-1.88987	0.184759	-10.2289	1.47252e-24	2.87548e-22	AC131391.1	lncRNA
ENSG00000199883.1	1.8799	-1.88832	0.306087	-6.16922	6.86276e-10	9.29291e-09	RN7SKP90	misc_RNA
ENSG00000281692.2	9.21975	-1.88816	0.176146	-10.7193	8.26418e-27	2.16439e-24	PACRG-AS1	lncRNA
ENSG00000250006.2	0.565237	-1.88768	0.433475	-4.35477	1.33209e-05	6.58839e-05	AC008638.2	processed_pseudogene
ENSG00000259161.2	1.72203	-1.88632	0.275077	-6.85742	7.01131e-12	1.42802e-10	NPM1P20	processed_pseudogene
ENSG00000185274.12	204.533	-1.88569	0.229122	-8.23006	1.87117e-16	9.23617e-15	GALNT17	protein_coding
ENSG00000274995.1	0.90304	-1.88555	0.322356	-5.84928	4.9372e-09	5.50373e-08	AC013564.1	lncRNA
ENSG00000287066.1	0.729394	-1.88523	0.337168	-5.59137	2.25284e-08	2.15428e-07	AP000962.3	lncRNA
ENSG00000228411.1	1.74196	-1.88327	0.345133	-5.45664	4.85235e-08	4.32861e-07	CDY4P	processed_pseudogene
ENSG00000242066.3	0.571245	-1.88273	0.521968	-3.60698	0.000309782	0.0010804	RN7SL214P	misc_RNA
ENSG00000280109.3	38.2064	-1.88235	0.181261	-10.3847	2.90939e-25	6.25772e-23	PLAC4	lncRNA
ENSG00000262714.1	12.2022	-1.8819	0.185743	-10.1317	3.99496e-24	7.28966e-22	AC007342.5	lncRNA
ENSG00000280650.1	1.30689	-1.88074	0.320465	-5.86879	4.38974e-09	4.95298e-08	KCNIP4-IT1	lncRNA
ENSG00000263989.2	0.974958	-1.87981	0.292208	-6.43314	1.24996e-10	1.9791e-09	RN7SL615P	misc_RNA
ENSG00000258716.1	0.582729	-1.87843	0.465481	-4.03547	5.44933e-05	0.000230234	AL139193.2	lncRNA
ENSG00000284601.1	2.58209	-1.87724	0.251359	-7.46837	8.11967e-14	2.43279e-12	AL590440.2	lncRNA
ENSG00000285610.1	1.54269	-1.87698	0.320866	-5.84973	4.92385e-09	5.49022e-08	AL590286.2	lncRNA
ENSG00000235429.1	0.486424	-1.87695	0.507447	-3.6988	0.000216619	0.000785193	AC083875.1	processed_pseudogene
ENSG00000201793.1	1.54762	-1.87492	0.312108	-6.00728	1.88667e-09	2.31725e-08	RN7SKP9	misc_RNA
ENSG00000242893.3	0.529182	-1.87402	0.549329	-3.41147	0.000646132	0.00207171	RN7SL413P	misc_RNA
ENSG00000278992.1	0.64037	-1.87302	0.403496	-4.64198	3.45088e-06	1.96375e-05	AC012048.1	TEC
ENSG00000198217.4	0.565925	-1.8723	0.60514	-3.09399	0.00197481	0.00555148	OR51H2P	transcribed_unprocessed_pseudogene
ENSG00000231905.2	0.953922	-1.87117	0.324614	-5.76431	8.1994e-09	8.66307e-08	SETP10	processed_pseudogene
ENSG00000262038.1	1.32729	-1.86749	0.304997	-6.12297	9.18453e-10	1.20626e-08	AC007599.2	lncRNA
ENSG00000251456.1	0.681455	-1.8674	0.352527	-5.29719	1.17597e-07	9.58936e-07	AC113398.2	lncRNA
ENSG00000223336.1	0.831276	-1.8673	0.372005	-5.01957	5.17878e-07	3.62368e-06	RNU2-6P	snRNA
ENSG00000228481.1	0.762997	-1.86622	0.37316	-5.00113	5.69958e-07	3.94899e-06	PRKCE-AS1	lncRNA
ENSG00000207392.1	2.20528	-1.86553	0.247724	-7.53068	5.04759e-14	1.58041e-12	SNORA20	snoRNA
ENSG00000259964.7	1.62637	-1.86514	0.308687	-6.04216	1.52062e-09	1.89802e-08	THSD4-AS1	lncRNA
ENSG00000275014.1	0.939466	-1.86469	0.368818	-5.05584	4.28506e-07	3.06234e-06	RN7SL166P	misc_RNA
ENSG00000266794.2	0.747929	-1.86364	0.584147	-3.19037	0.00142092	0.00415279	RN7SL7P	misc_RNA
ENSG00000250692.1	0.987618	-1.8612	0.293642	-6.33834	2.32249e-10	3.47694e-09	AC008667.2	lncRNA
ENSG00000240002.1	0.907215	-1.86054	0.311382	-5.97511	2.29942e-09	2.76769e-08	YBX1P3	processed_pseudogene
ENSG00000255340.1	1.93601	-1.86024	0.27554	-6.75126	1.46567e-11	2.78871e-10	AC087276.3	lncRNA
ENSG00000256249.1	0.914863	-1.85965	0.362198	-5.13434	2.83142e-07	2.11445e-06	AC026333.3	lncRNA
ENSG00000237058.1	0.507505	-1.85922	0.768502	-2.41928	0.0155513	0.0335493	MMEL1-AS1	lncRNA
ENSG00000232392.1	1.72843	-1.85866	0.265199	-7.00856	2.40781e-12	5.39793e-11	GOT2P7	processed_pseudogene
ENSG00000255296.1	1.38889	-1.85587	0.289186	-6.41758	1.38454e-10	2.17209e-09	AP002490.2	processed_pseudogene
ENSG00000270632.1	0.725336	-1.85494	0.363864	-5.0979	3.43443e-07	2.51457e-06	AL356575.1	processed_pseudogene
ENSG00000201198.1	1.3045	-1.85376	0.324681	-5.70947	1.13327e-08	1.15567e-07	RNU6-879P	snRNA
ENSG00000021852.13	2.42582	-1.85334	0.352624	-5.25585	1.47339e-07	1.17373e-06	C8B	protein_coding
ENSG00000226010.1	1.20231	-1.85315	0.251717	-7.36204	1.81123e-13	5.06541e-12	AL355852.1	processed_pseudogene
ENSG00000264480.1	0.570286	-1.85166	0.37592	-4.92569	8.40649e-07	5.58546e-06	MIR4714	miRNA
ENSG00000165621.8	21.341	-1.85133	0.185064	-10.0038	1.46728e-23	2.4652e-21	OXGR1	protein_coding
ENSG00000279083.1	1.87479	-1.85054	0.240308	-7.7007	1.35324e-14	4.68875e-13	AL160274.1	TEC
ENSG00000202184.1	0.746029	-1.8494	0.460255	-4.01821	5.86431e-05	0.000245839	RNU6-1283P	snRNA
ENSG00000264536.1	0.517079	-1.8481	0.659252	-2.80333	0.00505782	0.0126312	MIR5706	miRNA
ENSG00000213896.4	1.24642	-1.84628	0.345515	-5.34357	9.11331e-08	7.61853e-07	AC109486.1	processed_pseudogene
ENSG00000253270.1	1.72018	-1.84591	0.404601	-4.56228	5.06002e-06	2.77961e-05	AC090541.1	lncRNA
ENSG00000115616.3	86.205	-1.84443	0.207611	-8.88409	6.44482e-19	4.8552e-17	SLC9A2	protein_coding
ENSG00000231383.2	0.489781	-1.84417	0.577306	-3.19444	0.00140104	0.00410359	FGF12-AS1	lncRNA
ENSG00000243621.1	0.838403	-1.84279	0.34309	-5.37115	7.82348e-08	6.64235e-07	AC003989.2	processed_pseudogene
ENSG00000263477.1	2.08681	-1.84207	0.273325	-6.7395	1.58932e-11	3.00091e-10	AC104982.2	lncRNA
ENSG00000278484.1	1.34807	-1.84199	0.341556	-5.39294	6.93123e-08	5.95062e-07	AC010998.3	lncRNA
ENSG00000264862.2	0.950243	-1.84045	0.343702	-5.35478	8.56606e-08	7.20686e-07	RN7SL45P	misc_RNA
ENSG00000279512.1	2.52742	-1.83699	0.222239	-8.26582	1.38735e-16	6.94814e-15	AC011755.1	TEC
ENSG00000259268.2	1.11549	-1.83617	0.382247	-4.80362	1.5582e-06	9.69477e-06	AC007950.1	lncRNA
ENSG00000286042.1	8.38786	-1.83557	0.259979	-7.06045	1.65961e-12	3.82656e-11	LCAL1	lncRNA
ENSG00000232916.1	1.25221	-1.83476	0.283037	-6.48239	9.02783e-11	1.47125e-09	HMGN2P27	processed_pseudogene
ENSG00000225005.1	2.48805	-1.83421	0.232914	-7.87506	3.40579e-15	1.31972e-13	AC211485.1	processed_pseudogene
ENSG00000200816.1	1.88323	-1.83267	0.28254	-6.4864	8.79094e-11	1.43633e-09	SNORA38	snoRNA
ENSG00000254787.1	0.628199	-1.83076	0.405445	-4.51544	6.31852e-06	3.38368e-05	AP001825.1	lncRNA
ENSG00000205363.6	198.642	-1.83049	0.159887	-11.4487	2.38768e-30	9.75293e-28	INSYN1	protein_coding
ENSG00000250930.5	1.67178	-1.83026	0.280658	-6.52133	6.96851e-11	1.15981e-09	LNX1-AS1	lncRNA
ENSG00000276031.1	0.729011	-1.82971	0.405765	-4.50928	6.50488e-06	3.47304e-05	RN7SL197P	misc_RNA
ENSG00000258998.2	2.40007	-1.82909	0.304094	-6.01488	1.80023e-09	2.22212e-08	LINC02302	lncRNA
ENSG00000252719.1	0.499043	-1.82592	0.511655	-3.56865	0.000358829	0.00123206	AL356785.1	snoRNA
ENSG00000254879.1	4.58755	-1.82094	0.261733	-6.95727	3.46934e-12	7.52022e-11	PTPRJ-AS1	lncRNA
ENSG00000200087.1	64.9388	-1.82079	0.186041	-9.78703	1.28002e-22	1.89337e-20	SNORA73B	snoRNA
ENSG00000201201.1	0.564688	-1.81972	0.509886	-3.56887	0.000358518	0.00123109	RN7SKP118	misc_RNA
ENSG00000251523.1	1.68047	-1.81922	0.245611	-7.4069	1.29284e-13	3.73289e-12	AC108159.1	lncRNA
ENSG00000135226.18	3.35384	-1.81908	0.282819	-6.43197	1.25959e-10	1.99291e-09	UGT2B28	protein_coding
ENSG00000283653.1	0.784381	-1.81903	0.384674	-4.72877	2.25883e-06	1.35211e-05	AC091948.1	unprocessed_pseudogene
ENSG00000254988.1	1.77438	-1.81815	0.275319	-6.60379	4.00764e-11	6.98638e-10	AP002498.1	lncRNA
ENSG00000241587.3	0.805449	-1.81674	0.287805	-6.31238	2.74777e-10	4.06171e-09	RN7SL482P	misc_RNA
ENSG00000271765.1	1.23711	-1.8141	0.279456	-6.49154	8.49615e-11	1.39071e-09	RN7SKP299	misc_RNA
ENSG00000201998.1	5.6737	-1.81323	0.211891	-8.55737	1.15474e-17	6.98538e-16	SNORA23	snoRNA
ENSG00000186766.8	71.0593	-1.81301	0.214449	-8.45427	2.80845e-17	1.59702e-15	FOXI2	protein_coding
ENSG00000241073.1	0.71602	-1.81283	0.350945	-5.16557	2.39704e-07	1.81905e-06	AC093019.2	lncRNA
ENSG00000287416.1	0.599629	-1.80823	0.732191	-2.46961	0.013526	0.0297274	AC093746.1	lncRNA
ENSG00000272895.1	0.842962	-1.80702	0.377812	-4.78285	1.72827e-06	1.06296e-05	AC009303.3	lncRNA
ENSG00000222974.1	0.421899	-1.80582	1.01512	-1.77893	0.0752518	0.128893	RN7SKP228	misc_RNA
ENSG00000242360.3	1.02181	-1.80542	0.38189	-4.7276	2.27185e-06	1.35771e-05	RN7SL272P	misc_RNA
ENSG00000240533.3	2.40298	-1.80535	0.282155	-6.39843	1.5698e-10	2.43442e-09	RN7SL69P	misc_RNA
ENSG00000285586.1	1.21609	-1.80501	0.300284	-6.01101	1.8437e-09	2.26822e-08	AL132875.3	lncRNA
ENSG00000242318.1	0.754644	-1.80494	0.382695	-4.71639	2.40069e-06	1.42552e-05	AC058823.1	processed_pseudogene
ENSG00000243333.3	1.64176	-1.8029	0.290206	-6.21249	5.21519e-10	7.24706e-09	RN7SL174P	misc_RNA
ENSG00000255476.1	1.57297	-1.80156	0.272508	-6.61104	3.81639e-11	6.68439e-10	AC011092.2	lncRNA
ENSG00000258766.1	1.1449	-1.80038	0.343179	-5.24618	1.55288e-07	1.22979e-06	DIO2-AS1	lncRNA
ENSG00000284696.2	1.47987	-1.7994	0.323304	-5.56566	2.61161e-08	2.46715e-07	LINC02808	lncRNA
ENSG00000241032.3	0.677394	-1.79812	0.507062	-3.54614	0.000390912	0.00132879	RN7SL709P	misc_RNA
ENSG00000248335.1	0.551854	-1.79745	0.456739	-3.93539	8.30605e-05	0.000335247	AC096733.1	lncRNA
ENSG00000206976.1	1.09289	-1.7972	0.343383	-5.2338	1.66063e-07	1.3093e-06	AC087441.1	snoRNA
ENSG00000267234.1	1.3177	-1.79615	0.312379	-5.7499	8.92959e-09	9.3283e-08	AC092067.1	lncRNA
ENSG00000231849.1	1.51848	-1.79231	0.2903	-6.17399	6.65874e-10	9.03864e-09	UBE2V2P4	processed_pseudogene
ENSG00000287191.1	2.29864	-1.79202	0.240451	-7.45277	9.14004e-14	2.72063e-12	AC055807.1	lncRNA
ENSG00000236520.2	1.78725	-1.79161	0.251714	-7.11762	1.09809e-12	2.62286e-11	GPC6-AS1	lncRNA
ENSG00000249699.1	1.2112	-1.7912	0.297971	-6.01134	1.83995e-09	2.26487e-08	LINC02261	lncRNA
ENSG00000252438.1	0.903982	-1.79081	0.378329	-4.73347	2.20718e-06	1.32565e-05	AL391314.1	snoRNA
ENSG00000239627.3	1.10667	-1.79039	0.303801	-5.89328	3.78595e-09	4.34326e-08	RPL12P20	processed_pseudogene
ENSG00000248144.6	54.111	-1.79033	0.186963	-9.57582	1.01055e-21	1.2498e-19	ADH1C	protein_coding
ENSG00000254330.1	0.940614	-1.79021	0.317716	-5.63461	1.7546e-08	1.71315e-07	AC104232.2	lncRNA
ENSG00000254856.1	1.60025	-1.79002	0.268522	-6.6662	2.62509e-11	4.79592e-10	NDUFA3P2	processed_pseudogene
ENSG00000239316.3	1.19519	-1.78931	0.296603	-6.03266	1.61278e-09	2.00968e-08	RN7SL11P	misc_RNA
ENSG00000207508.1	1.12812	-1.7879	0.317566	-5.63003	1.80178e-08	1.75422e-07	RNU6-1237P	snRNA
ENSG00000231114.1	0.880993	-1.78757	0.327889	-5.45175	4.98758e-08	4.4368e-07	AC078842.2	lncRNA
ENSG00000270560.1	4.35691	-1.78733	0.19657	-9.09256	9.67322e-20	8.49469e-18	APOOP1	processed_pseudogene
ENSG00000176387.7	4575.43	-1.78723	0.146172	-12.2269	2.23295e-34	1.42025e-31	HSD11B2	protein_coding
ENSG00000148513.18	5.32664	-1.78692	0.249692	-7.15649	8.277e-13	2.01596e-11	ANKRD30A	protein_coding
ENSG00000276532.1	0.760451	-1.78556	0.484935	-3.68207	0.000231352	0.000832496	Metazoa_SRP	misc_RNA
ENSG00000267014.6	106.336	-1.78345	0.149536	-11.9266	8.60492e-33	4.45485e-30	LINC01532	lncRNA
ENSG00000254542.1	2.74241	-1.78045	0.282538	-6.30164	2.94517e-10	4.3305e-09	NAV2-AS3	lncRNA
ENSG00000287592.1	1.86041	-1.78034	0.263215	-6.76384	1.34379e-11	2.57997e-10	AC073348.2	lncRNA
ENSG00000144227.5	10.6203	-1.77977	0.363106	-4.90152	9.50976e-07	6.23018e-06	NXPH2	protein_coding
ENSG00000229770.2	0.815993	-1.77878	0.364633	-4.87827	1.07022e-06	6.91673e-06	AL022337.1	lncRNA
ENSG00000232437.1	0.484206	-1.77671	0.472111	-3.76334	0.000167658	0.000625388	RPS26P42	processed_pseudogene
ENSG00000200783.1	2.10475	-1.77659	0.274722	-6.46687	1.00053e-10	1.61283e-09	RN7SKP180	misc_RNA
ENSG00000249098.1	1.00846	-1.77628	0.327794	-5.41888	5.99721e-08	5.22812e-07	AC055733.1	processed_pseudogene
ENSG00000171714.12	283.648	-1.7752	0.180871	-9.81473	9.7298e-23	1.47347e-20	ANO5	protein_coding
ENSG00000265486.2	0.409095	-1.77411	0.991214	-1.78983	0.0734805	0.126333	RN7SL518P	misc_RNA
ENSG00000248878.1	0.661513	-1.77252	0.342171	-5.18023	2.21612e-07	1.69591e-06	AC022447.4	transcribed_processed_pseudogene
ENSG00000241409.1	0.836442	-1.77185	0.378137	-4.68575	2.78933e-06	1.62551e-05	AC064852.1	lncRNA
ENSG00000149305.7	3.49889	-1.77003	0.259391	-6.82378	8.86728e-12	1.76564e-10	HTR3B	protein_coding
ENSG00000222743.1	1.00055	-1.76958	0.306446	-5.77454	7.71614e-09	8.2129e-08	RNU6-1190P	snRNA
ENSG00000157131.11	3.24368	-1.76932	0.33047	-5.35396	8.60494e-08	7.23273e-07	C8A	protein_coding
ENSG00000285619.1	0.758021	-1.76913	0.340148	-5.20108	1.98136e-07	1.53393e-06	AL449214.1	lncRNA
ENSG00000226441.2	0.597295	-1.76804	0.358114	-4.93709	7.92974e-07	5.30592e-06	PLCL2-AS1	lncRNA
ENSG00000237626.2	8.74236	-1.76788	0.173421	-10.1941	2.10591e-24	4.0069e-22	AL161629.1	lncRNA
ENSG00000253586.1	1.10435	-1.76688	0.279612	-6.31904	2.6319e-10	3.906e-09	AC067817.1	lncRNA
ENSG00000241243.3	1.61298	-1.76591	0.251533	-7.02059	2.20939e-12	4.98323e-11	RN7SL629P	misc_RNA
ENSG00000255492.1	0.870679	-1.76466	0.390681	-4.51688	6.27561e-06	3.36394e-05	H3P33	processed_pseudogene
ENSG00000243005.3	1.10062	-1.76386	0.319139	-5.52695	3.25839e-08	3.00982e-07	RN7SL16P	misc_RNA
ENSG00000196553.15	6.6602	-1.75913	0.153763	-11.4405	2.6231e-30	1.06171e-27	CCDC196	protein_coding
ENSG00000273710.1	0.877235	-1.75871	0.351229	-5.00729	5.52021e-07	3.83666e-06	Metazoa_SRP	misc_RNA
ENSG00000118596.12	1786.92	-1.75823	0.134868	-13.0367	7.56792e-39	6.87646e-36	SLC16A7	protein_coding
ENSG00000263862.2	4.16661	-1.75735	0.232454	-7.55999	4.031e-14	1.2792e-12	LINC01543	lncRNA
ENSG00000252377.1	0.575496	-1.75734	0.356886	-4.92411	8.47455e-07	5.62398e-06	RNU6-504P	snRNA
ENSG00000251011.6	1.10998	-1.75723	0.332774	-5.28056	1.28788e-07	1.04179e-06	TMEM108-AS1	lncRNA
ENSG00000257624.1	3.97821	-1.75682	0.197494	-8.89553	5.81398e-19	4.40231e-17	AC004024.1	processed_pseudogene
ENSG00000203647.2	1.15876	-1.75594	0.345414	-5.08358	3.70379e-07	2.69011e-06	AC106827.1	processed_pseudogene
ENSG00000287489.1	0.558187	-1.75411	0.44755	-3.91935	8.87875e-05	0.000356006	AC004549.1	lncRNA
ENSG00000267175.5	0.979158	-1.75365	0.291692	-6.01199	1.83265e-09	2.25775e-08	AC105094.2	lncRNA
ENSG00000267402.1	1.16582	-1.753	0.32934	-5.32276	1.02204e-07	8.45489e-07	TCF4-AS2	lncRNA
ENSG00000238835.1	1.21793	-1.75096	0.264382	-6.62285	3.52339e-11	6.23015e-10	SCARNA18	snoRNA
ENSG00000243124.3	0.489093	-1.75068	0.843054	-2.0766	0.0378388	0.072011	RN7SL643P	misc_RNA
ENSG00000232136.2	2.70852	-1.75031	0.22343	-7.83381	4.73304e-15	1.78131e-13	DUXAP7	processed_pseudogene
ENSG00000227249.1	1.07984	-1.74935	0.382704	-4.57103	4.85322e-06	2.67923e-05	AC000374.1	processed_pseudogene
ENSG00000226128.1	0.6675	-1.74837	0.411931	-4.24432	2.19254e-05	0.00010268	RPL26P9	processed_pseudogene
ENSG00000221628.1	0.369523	-1.74701	1.0049	-1.73849	0.0821239	0.13871	MIR1302-4	miRNA
ENSG00000261399.1	40.6851	-1.74478	0.18485	-9.43887	3.76816e-21	4.19424e-19	AL031710.1	lncRNA
ENSG00000240198.5	0.530048	-1.74467	0.490834	-3.5545	0.000378692	0.00129269	ARHGEF3-AS1	lncRNA
ENSG00000281376.1	1.8385	-1.74425	0.246052	-7.08894	1.35142e-12	3.1718e-11	ABALON	lncRNA
ENSG00000249436.2	1.13907	-1.74397	0.310956	-5.60841	2.04198e-08	1.96658e-07	LINCR-0003	lncRNA
ENSG00000224488.1	1.06169	-1.7437	0.277891	-6.27477	3.50163e-10	5.07331e-09	SAMM50P1	processed_pseudogene
ENSG00000258536.1	0.727112	-1.74324	0.770485	-2.26253	0.0236647	0.0480471	FKBP1BP1	processed_pseudogene
ENSG00000199730.1	1.03612	-1.74316	0.364616	-4.78081	1.74591e-06	1.07262e-05	RN7SKP95	misc_RNA
ENSG00000241229.3	0.573187	-1.7431	0.427456	-4.07786	4.5453e-05	0.0001964	RN7SL443P	misc_RNA
ENSG00000200351.1	1.17292	-1.74285	0.263431	-6.61597	3.69129e-11	6.49587e-10	Y_RNA	misc_RNA
ENSG00000257392.1	0.808765	-1.74214	0.427885	-4.07151	4.67092e-05	0.0002013	AC126177.2	unprocessed_pseudogene
ENSG00000265885.2	0.473212	-1.74181	0.798036	-2.18262	0.0290641	0.0573844	RN7SL783P	misc_RNA
ENSG00000139144.11	15.9717	-1.74164	0.242776	-7.17386	7.29147e-13	1.79755e-11	PIK3C2G	protein_coding
ENSG00000206623.1	0.635013	-1.74084	0.383506	-4.53929	5.6443e-06	3.06577e-05	RNU6-979P	snRNA
ENSG00000214671.4	0.868604	-1.73957	0.336255	-5.17337	2.29907e-07	1.75216e-06	RPL6P12	processed_pseudogene
ENSG00000287220.1	0.780062	-1.73752	0.335376	-5.18082	2.20915e-07	1.69204e-06	AL590138.1	lncRNA
ENSG00000233044.1	1.07781	-1.73719	0.30752	-5.64902	1.61362e-08	1.58489e-07	AL049820.1	lncRNA
ENSG00000199319.1	0.606506	-1.73439	0.452576	-3.83227	0.000126967	0.000489223	RN7SKP25	misc_RNA
ENSG00000266467.2	1.7574	-1.73436	0.276702	-6.26797	3.65781e-10	5.26712e-09	RN7SL220P	misc_RNA
ENSG00000201643.1	1.58414	-1.73301	0.317139	-5.46452	4.64152e-08	4.1547e-07	SNORA14A	snoRNA
ENSG00000233017.3	0.548206	-1.73296	0.474862	-3.6494	0.000262854	0.000932218	AL121832.1	lncRNA
ENSG00000281120.1	0.516495	-1.73055	0.406047	-4.26195	2.0265e-05	9.56697e-05	AC006355.2	lncRNA
ENSG00000230063.1	1.55565	-1.72983	0.260329	-6.6448	3.03619e-11	5.47067e-10	AL360091.2	lncRNA
ENSG00000258637.1	1.12815	-1.72948	0.289262	-5.97893	2.24605e-09	2.71742e-08	AC008056.1	lncRNA
ENSG00000226251.6	7.73071	-1.72864	0.210223	-8.22292	1.98612e-16	9.7495e-15	LINC02608	lncRNA
ENSG00000113805.8	128.615	-1.72812	0.217755	-7.93605	2.08729e-15	8.5015e-14	CNTN3	protein_coding
ENSG00000239910.3	0.707706	-1.72645	0.394657	-4.37456	1.21678e-05	6.07477e-05	RN7SL530P	misc_RNA
ENSG00000207988.1	0.637702	-1.72588	0.386109	-4.46993	7.82452e-06	4.098e-05	MIR576	miRNA
ENSG00000265520.1	1.05751	-1.72562	0.298674	-5.77761	7.57713e-09	8.07459e-08	MIR548V	miRNA
ENSG00000276281.1	1.05129	-1.72424	0.411256	-4.19262	2.75747e-05	0.000125971	RN7SL126P	misc_RNA
ENSG00000249738.10	21.2975	-1.724	0.181492	-9.49906	2.11794e-21	2.45464e-19	AC008691.1	lncRNA
ENSG00000243314.1	0.919459	-1.72348	0.345974	-4.98152	6.30875e-07	4.32197e-06	AC106707.2	processed_pseudogene
ENSG00000248378.1	0.539802	-1.72307	0.423528	-4.06836	4.73443e-05	0.000203663	AC022447.1	lncRNA
ENSG00000263511.1	0.924134	-1.72118	0.303259	-5.67561	1.38198e-08	1.3796e-07	MIR5699	miRNA
ENSG00000210077.1	2.73969	-1.72061	0.261383	-6.58273	4.61895e-11	7.96763e-10	MT-TV	Mt_tRNA
ENSG00000156687.11	300.394	-1.71951	0.211699	-8.12246	4.56827e-16	2.08394e-14	UNC5D	protein_coding
ENSG00000260694.1	0.492213	-1.71931	0.633035	-2.71598	0.00660802	0.0159515	AC009145.3	lncRNA
ENSG00000222511.2	0.668503	-1.71919	0.423892	-4.05572	4.99795e-05	0.000213411	Y_RNA	misc_RNA
ENSG00000152208.13	13.9231	-1.71767	0.221451	-7.75644	8.73469e-15	3.11864e-13	GRID2	protein_coding
ENSG00000252904.1	0.530621	-1.71646	0.50276	-3.41407	0.000640004	0.00205517	AC010359.1	snoRNA
ENSG00000242170.3	1.66139	-1.71642	0.262363	-6.54216	6.06379e-11	1.02148e-09	RN7SL329P	misc_RNA
ENSG00000265141.2	0.912499	-1.7154	0.525689	-3.26314	0.00110186	0.00332214	RN7SL451P	misc_RNA
ENSG00000252757.1	0.95849	-1.71536	0.300539	-5.7076	1.14583e-08	1.16795e-07	RN7SKP96	misc_RNA
ENSG00000224946.1	0.537802	-1.71489	0.432143	-3.96834	7.23749e-05	0.000296662	AC007312.1	processed_pseudogene
ENSG00000230322.1	2.02411	-1.7141	0.24896	-6.88502	5.77788e-12	1.19539e-10	AL136320.1	lncRNA
ENSG00000286827.1	0.65197	-1.71382	0.37029	-4.62833	3.68625e-06	2.08357e-05	AC072026.2	lncRNA
ENSG00000254688.1	1.94865	-1.71354	0.267988	-6.39407	1.61525e-10	2.49621e-09	AC013549.3	lncRNA
ENSG00000250358.6	4.30202	-1.71244	0.230268	-7.43673	1.03208e-13	3.04836e-12	LINC02200	lncRNA
ENSG00000231378.1	0.641963	-1.71218	0.368242	-4.64961	3.32567e-06	1.90124e-05	NDUFAF4P4	processed_pseudogene
ENSG00000252373.1	0.902978	-1.71216	0.299796	-5.71107	1.12271e-08	1.14621e-07	RNU6-358P	snRNA
ENSG00000271378.1	0.923237	-1.71138	0.285189	-6.00088	1.96252e-09	2.39982e-08	RBISP2	processed_pseudogene
ENSG00000228368.1	2.2464	-1.71135	0.235063	-7.28036	3.32922e-13	8.85994e-12	AC106873.1	lncRNA
ENSG00000285907.1	16.6374	-1.71033	0.144292	-11.8533	2.06905e-32	1.05885e-29	AL161910.1	lncRNA
ENSG00000252266.1	0.807902	-1.7089	0.346348	-4.93407	8.05331e-07	5.37809e-06	Y_RNA	misc_RNA
ENSG00000043591.6	29.6433	-1.7087	0.148817	-11.4819	1.62693e-30	7.03261e-28	ADRB1	protein_coding
ENSG00000285973.2	6.85524	-1.7081	0.184161	-9.27503	1.77572e-20	1.76081e-18	AC063960.2	lncRNA
ENSG00000258670.1	1.40008	-1.70805	0.347737	-4.9119	9.01993e-07	5.93242e-06	AL049874.3	lncRNA
ENSG00000207452.1	1.14339	-1.70783	0.282993	-6.03489	1.59072e-09	1.98274e-08	RNU6-606P	snRNA
ENSG00000228423.2	2.04044	-1.70779	0.271144	-6.29846	3.00614e-10	4.41141e-09	AL357552.2	lncRNA
ENSG00000182348.7	15.3726	-1.7061	0.285404	-5.97784	2.26122e-09	2.73206e-08	ZNF804B	protein_coding
ENSG00000283509.1	0.521965	-1.705	0.427982	-3.98381	6.78186e-05	0.000279919	U6	snRNA
ENSG00000255417.1	0.770539	-1.70498	0.358158	-4.76042	1.9319e-06	1.1765e-05	MTCO2P15	processed_pseudogene
ENSG00000260975.1	0.6557	-1.70491	0.706108	-2.41452	0.0157559	0.0339364	AC007333.2	lncRNA
ENSG00000200169.1	1.45691	-1.70479	0.307299	-5.54765	2.89531e-08	2.70871e-07	RNU5D-1	snRNA
ENSG00000201794.1	0.97632	-1.70263	0.345673	-4.92555	8.41246e-07	5.58777e-06	RN7SKP130	misc_RNA
ENSG00000055732.13	177.817	-1.70214	0.170778	-9.96694	2.12672e-23	3.52e-21	MCOLN3	protein_coding
ENSG00000224901.1	0.630396	-1.70192	0.479105	-3.55229	0.0003819	0.00130224	AL365258.1	lncRNA
ENSG00000262884.1	3.54215	-1.70018	0.22873	-7.43312	1.06067e-13	3.12537e-12	AC015921.1	lncRNA
ENSG00000143469.20	20.5373	-1.69996	0.277393	-6.12835	8.87974e-10	1.17037e-08	SYT14	protein_coding
ENSG00000259682.1	1.6456	-1.69955	0.280995	-6.04832	1.46365e-09	1.83205e-08	AC091231.1	lncRNA
ENSG00000183432.6	0.575503	-1.69842	0.419562	-4.04807	5.16426e-05	0.000219586	ZBTB8OSP1	processed_pseudogene
ENSG00000275126.2	0.627541	-1.69695	0.538474	-3.1514	0.00162487	0.00467005	H4C13	protein_coding
ENSG00000131183.11	491.22	-1.6953	0.219806	-7.71269	1.23197e-14	4.29194e-13	SLC34A1	protein_coding
ENSG00000212338.1	0.820326	-1.6947	0.411826	-4.11509	3.87021e-05	0.000170337	AL512326.2	snoRNA
ENSG00000253064.1	0.603033	-1.69442	0.424018	-3.99611	6.43913e-05	0.00026711	RNU6-711P	snRNA
ENSG00000197437.4	0.671413	-1.69428	0.419572	-4.03811	5.38843e-05	0.000227986	OR13G1	protein_coding
ENSG00000201955.1	0.484657	-1.69282	0.706567	-2.39584	0.0165825	0.0354543	RNY3P1	misc_RNA
ENSG00000213148.3	0.788717	-1.69138	0.436578	-3.87416	0.000106991	0.000420438	JPT1P1	processed_pseudogene
ENSG00000287092.1	1.54887	-1.68979	0.274693	-6.15158	7.67155e-10	1.02775e-08	AL589693.1	lncRNA
ENSG00000235920.1	2.36169	-1.6892	0.195608	-8.63566	5.83877e-18	3.69261e-16	THRAP3P3	processed_pseudogene
ENSG00000288076.1	2.40829	-1.68829	0.265821	-6.35121	2.13623e-10	3.22848e-09	AC018398.2	lncRNA
ENSG00000258455.1	1.09929	-1.68677	0.316722	-5.3257	1.00567e-07	8.33483e-07	AL158801.3	lncRNA
ENSG00000267339.7	57.2114	-1.68553	0.177446	-9.49883	2.12258e-21	2.45464e-19	LINC00906	lncRNA
ENSG00000227929.4	0.635636	-1.685	0.424355	-3.97073	7.16519e-05	0.000294132	SRGAP3-AS3	lncRNA
ENSG00000184999.12	4.65994	-1.68467	0.209043	-8.05892	7.69687e-16	3.34983e-14	SLC22A10	protein_coding
ENSG00000242079.1	0.684913	-1.68223	0.388422	-4.33093	1.48478e-05	7.26051e-05	RN7SL318P	misc_RNA
ENSG00000250592.1	0.507041	-1.68213	0.602674	-2.7911	0.00525286	0.013059	AC055733.2	lncRNA
ENSG00000275961.1	0.359571	-1.67912	0.713397	-2.35369	0.0185882	0.0391135	RN7SL210P	misc_RNA
ENSG00000202417.1	1.23351	-1.67909	0.29093	-5.77147	7.85806e-09	8.34004e-08	Y_RNA	misc_RNA
ENSG00000227773.1	2.06369	-1.67857	0.232075	-7.23288	4.72858e-13	1.22047e-11	ASH1L-IT1	lncRNA
ENSG00000243366.3	0.497892	-1.67753	0.549576	-3.0524	0.00227017	0.00627208	RN7SL60P	misc_RNA
ENSG00000263708.2	1.09166	-1.67591	0.328883	-5.09576	3.4734e-07	2.5406e-06	AC005695.2	lncRNA
ENSG00000187621.15	135.209	-1.67535	0.193299	-8.66717	4.42975e-18	2.86666e-16	TCL6	lncRNA
ENSG00000260641.1	29.4513	-1.6748	0.159875	-10.4756	1.11772e-25	2.55201e-23	AC114811.2	lncRNA
ENSG00000230782.1	2.1758	-1.67403	0.217164	-7.70859	1.27212e-14	4.42488e-13	AL807761.4	lncRNA
ENSG00000240175.1	1.12157	-1.67281	0.30292	-5.52229	3.34614e-08	3.08511e-07	MAGI1-AS1	lncRNA
ENSG00000270112.4	30.146	-1.6706	0.146779	-11.3817	5.1558e-30	2.03143e-27	AC090241.2	lncRNA
ENSG00000225658.1	0.67875	-1.66898	0.351072	-4.75396	1.9947e-06	1.20961e-05	TAF13P2	processed_pseudogene
ENSG00000240861.1	0.721376	-1.66836	0.320099	-5.21201	1.868e-07	1.45401e-06	AC009153.1	processed_pseudogene
ENSG00000261502.4	33.4182	-1.66835	0.186306	-8.9549	3.40055e-19	2.694e-17	AC040174.1	lncRNA
ENSG00000243770.3	0.786129	-1.66689	0.505482	-3.29762	0.000975079	0.00298087	RN7SL65P	misc_RNA
ENSG00000206819.1	0.851718	-1.66607	0.346406	-4.8096	1.51236e-06	9.44119e-06	RNU6-260P	snRNA
ENSG00000123843.13	21.6967	-1.66559	0.169628	-9.81911	9.31646e-23	1.41569e-20	C4BPB	protein_coding
ENSG00000239595.3	0.772167	-1.66462	0.375112	-4.43767	9.09398e-06	4.68461e-05	RN7SL79P	misc_RNA
ENSG00000232282.1	1.02747	-1.66176	0.284136	-5.84844	4.96194e-09	5.52992e-08	MTND1P32	processed_pseudogene
ENSG00000273675.1	1.40518	-1.66135	0.315789	-5.26095	1.43314e-07	1.14618e-06	AL118556.2	processed_pseudogene
ENSG00000279741.1	3.09454	-1.66128	0.240459	-6.90878	4.88849e-12	1.02327e-10	AC007342.8	TEC
ENSG00000225203.2	0.510787	-1.66124	0.49309	-3.36905	0.000754283	0.00237772	AL139230.1	lncRNA
ENSG00000226767.1	0.752467	-1.66113	0.491414	-3.38031	0.000724045	0.00229328	AC114501.1	processed_pseudogene
ENSG00000264217.2	0.832541	-1.66087	0.33574	-4.94691	7.53989e-07	5.0618e-06	RPL35AP23	processed_pseudogene
ENSG00000243905.3	0.862284	-1.6588	0.359288	-4.61692	3.89483e-06	2.192e-05	RN7SL679P	misc_RNA
ENSG00000206703.1	0.436979	-1.65819	0.584893	-2.83503	0.00458212	0.0115954	RNU6-128P	snRNA
ENSG00000202260.1	0.617119	-1.65704	0.338936	-4.88894	1.01381e-06	6.59431e-06	RN7SKP69	misc_RNA
ENSG00000267028.1	0.842448	-1.6564	0.370336	-4.4727	7.72396e-06	4.04962e-05	TCF4-AS1	lncRNA
ENSG00000198732.11	260.41	-1.65599	0.201541	-8.21664	2.09285e-16	1.01942e-14	SMOC1	protein_coding
ENSG00000280061.1	3.82784	-1.65593	0.306476	-5.40314	6.54825e-08	5.65124e-07	AC011504.1	TEC
ENSG00000242353.1	4.02843	-1.65408	0.199414	-8.29468	1.08875e-16	5.53995e-15	RPL12P30	processed_pseudogene
ENSG00000258007.1	1.1874	-1.65325	0.32581	-5.07427	3.88983e-07	2.81331e-06	AC063947.1	lncRNA
ENSG00000206654.1	0.496905	-1.65318	0.418758	-3.94783	7.88626e-05	0.000320219	RNU6-608P	snRNA
ENSG00000222561.1	0.733819	-1.65162	0.317735	-5.1981	2.01339e-07	1.55548e-06	RNU6-1025P	snRNA
ENSG00000199990.1	1.81413	-1.6516	0.341795	-4.83214	1.35072e-06	8.52662e-06	VTRNA1-1	misc_RNA
ENSG00000164825.4	5636.6	-1.65146	0.169579	-9.73859	2.06404e-22	2.94542e-20	DEFB1	protein_coding
ENSG00000204323.5	150.186	-1.65072	0.150432	-10.9733	5.13888e-28	1.53556e-25	SMIM5	protein_coding
ENSG00000226249.1	0.969809	-1.64937	0.285118	-5.78487	7.25668e-09	7.77217e-08	AL365271.1	lncRNA
ENSG00000139780.7	1.20967	-1.6492	0.316818	-5.20551	1.93468e-07	1.50197e-06	METTL21C	protein_coding
ENSG00000181616.9	1.2728	-1.64805	0.263101	-6.26393	3.754e-10	5.39681e-09	OR52H1	protein_coding
ENSG00000240750.3	1.66178	-1.64564	0.227473	-7.23445	4.6743e-13	1.20856e-11	RN7SL559P	misc_RNA
ENSG00000276486.1	1.07923	-1.64556	0.324924	-5.06446	4.09559e-07	2.9449e-06	AC022960.3	processed_pseudogene
ENSG00000212461.1	0.590141	-1.64504	0.407833	-4.03361	5.49269e-05	0.000231758	AC078860.1	snoRNA
ENSG00000201047.1	0.573832	-1.64458	0.416335	-3.95015	7.81027e-05	0.000317394	Y_RNA	misc_RNA
ENSG00000176490.5	82.0474	-1.64453	0.182389	-9.01662	1.93988e-19	1.62961e-17	DIRAS1	protein_coding
ENSG00000117601.14	28.6549	-1.64386	0.174822	-9.40304	5.30068e-21	5.74215e-19	SERPINC1	protein_coding
ENSG00000261102.2	1.05069	-1.64376	0.330725	-4.97017	6.68954e-07	4.55343e-06	ATP5MFP6	processed_pseudogene
ENSG00000279836.1	1.79878	-1.64156	0.301298	-5.44828	5.08587e-08	4.51792e-07	AP002967.1	TEC
ENSG00000226899.1	3.0403	-1.63967	0.225031	-7.28641	3.18316e-13	8.51194e-12	AL731577.1	lncRNA
ENSG00000171431.4	9.31182	-1.63897	0.246657	-6.64474	3.03756e-11	5.47092e-10	KRT20	protein_coding
ENSG00000201519.1	0.685857	-1.63496	0.456587	-3.58083	0.000342502	0.00118229	RNU6-645P	snRNA
ENSG00000279354.1	0.849762	-1.63354	0.406155	-4.02196	5.77148e-05	0.000242373	AC090373.1	TEC
ENSG00000264582.2	0.55707	-1.6307	0.441477	-3.69373	0.000220986	0.000799332	RN7SL326P	misc_RNA
ENSG00000184698.5	1.25438	-1.6296	0.25621	-6.36042	2.01208e-10	3.05539e-09	OR51M1	protein_coding
ENSG00000233979.1	0.953086	-1.62816	0.314346	-5.17951	2.22473e-07	1.70134e-06	RPL22P21	processed_pseudogene
ENSG00000185133.14	215.463	-1.62734	0.149353	-10.896	1.2048e-27	3.46072e-25	INPP5J	protein_coding
ENSG00000240490.3	2.28147	-1.62727	0.253517	-6.41878	1.37371e-10	2.15737e-09	RN7SL277P	misc_RNA
ENSG00000207589.1	1.23227	-1.62692	0.234132	-6.94872	3.68619e-12	7.92468e-11	MIR508	miRNA
ENSG00000242175.3	2.63589	-1.62657	0.211296	-7.69807	1.38132e-14	4.77859e-13	RN7SL127P	misc_RNA
ENSG00000241625.3	1.03194	-1.62609	0.299129	-5.4361	5.44606e-08	4.79768e-07	RN7SL18P	misc_RNA
ENSG00000240869.3	4.75504	-1.62582	0.19584	-8.30179	1.02551e-16	5.23611e-15	RN7SL128P	misc_RNA
ENSG00000252496.1	0.731065	-1.6241	0.339279	-4.78693	1.69353e-06	1.04448e-05	RNA5SP33	rRNA_pseudogene
ENSG00000250230.3	2.79556	-1.62367	0.298652	-5.43667	5.4287e-08	4.78428e-07	AP002754.1	lncRNA
ENSG00000263815.2	2.32987	-1.62323	0.257102	-6.31354	2.72715e-10	4.03526e-09	RN7SL426P	misc_RNA
ENSG00000254915.1	0.532765	-1.62302	0.476853	-3.40361	0.000665022	0.00212509	AP003168.1	processed_pseudogene
ENSG00000251306.1	1.03387	-1.62178	0.263899	-6.14547	7.97265e-10	1.06373e-08	NDUFB4P2	processed_pseudogene
ENSG00000257847.1	1.35275	-1.62074	0.286463	-5.65775	1.53371e-08	1.51408e-07	LSM3P2	processed_pseudogene
ENSG00000224731.1	0.787918	-1.62045	0.348097	-4.65518	3.23692e-06	1.85718e-05	AC016716.1	lncRNA
ENSG00000274115.1	1.0101	-1.62032	0.271845	-5.96048	2.51495e-09	2.9958e-08	MIR6081	miRNA
ENSG00000113494.17	1140.37	-1.61944	0.140541	-11.5229	1.01132e-30	4.41439e-28	PRLR	protein_coding
ENSG00000222960.1	0.646106	-1.61707	0.379315	-4.26314	2.01577e-05	9.52336e-05	RNU6-272P	snRNA
ENSG00000249089.1	0.68828	-1.61639	0.347477	-4.65178	3.29077e-06	1.88371e-05	AIG1P1	unprocessed_pseudogene
ENSG00000081138.14	11.1872	-1.61409	0.258201	-6.25131	4.07037e-10	5.78809e-09	CDH7	protein_coding
ENSG00000221038.1	1.05789	-1.61346	0.353733	-4.56124	5.08518e-06	2.79171e-05	RNU6ATAC7P	snRNA
ENSG00000224706.1	0.679815	-1.6128	0.373652	-4.31631	1.58658e-05	7.69575e-05	RPS17P13	processed_pseudogene
ENSG00000237130.1	0.943992	-1.61196	0.325064	-4.9589	7.0893e-07	4.794e-06	MRPS6P2	processed_pseudogene
ENSG00000256159.1	1.16078	-1.61051	0.296521	-5.43136	5.59272e-08	4.91133e-07	AC022080.2	processed_pseudogene
ENSG00000286460.1	1.54533	-1.61047	0.282467	-5.70146	1.18784e-08	1.20525e-07	AC006538.4	lncRNA
ENSG00000219409.2	1.06151	-1.60932	0.354692	-4.53722	5.70004e-06	3.09002e-05	AL590704.1	processed_pseudogene
ENSG00000239437.3	4.98749	-1.60924	0.192832	-8.34532	7.10213e-17	3.75991e-15	RN7SL752P	misc_RNA
ENSG00000240374.3	0.938243	-1.60924	0.37631	-4.27638	1.89958e-05	9.03288e-05	RN7SL503P	misc_RNA
ENSG00000286890.1	1.28366	-1.60901	0.263612	-6.10373	1.03622e-09	1.34428e-08	AC055840.1	lncRNA
ENSG00000270722.1	1.66448	-1.60785	0.325453	-4.94035	7.79841e-07	5.22197e-06	RNVU1-31	snRNA
ENSG00000165181.16	48.1297	-1.60717	0.147271	-10.913	9.98812e-28	2.92566e-25	SHOC1	protein_coding
ENSG00000278513.1	1.56043	-1.60679	0.351744	-4.56808	4.92223e-06	2.71396e-05	AC091046.2	unprocessed_pseudogene
ENSG00000253088.1	0.620457	-1.60666	0.399327	-4.02343	5.73578e-05	0.000241033	Y_RNA	misc_RNA
ENSG00000270531.1	1.29286	-1.60506	0.275131	-5.83379	5.41822e-09	5.98154e-08	AC022001.1	processed_pseudogene
ENSG00000232915.1	1.3378	-1.60438	0.296155	-5.41736	6.04851e-08	5.26692e-07	RNF14P1	processed_pseudogene
ENSG00000223896.2	0.643475	-1.60329	0.372502	-4.3041	1.67664e-05	8.0824e-05	CCNJP2	processed_pseudogene
ENSG00000251579.1	1.04216	-1.60324	0.386396	-4.14923	3.33595e-05	0.000149213	AC055733.3	processed_pseudogene
ENSG00000261804.2	8.90812	-1.60309	0.198979	-8.05662	7.84352e-16	3.41032e-14	AC007342.4	lncRNA
ENSG00000212135.1	1.9277	-1.6021	0.231034	-6.93449	4.07701e-12	8.68521e-11	SNORD67	snoRNA
ENSG00000201348.1	0.756721	-1.60173	0.327649	-4.88856	1.01575e-06	6.60495e-06	RNU105B	snoRNA
ENSG00000259685.3	5.83342	-1.59976	0.263657	-6.06757	1.29857e-09	1.64251e-08	IDH2-DT	lncRNA
ENSG00000271841.1	0.708944	-1.59781	0.434049	-3.68117	0.000232166	0.000834818	RNU7-10P	snRNA
ENSG00000242251.3	0.697935	-1.59705	0.418109	-3.81971	0.000133609	0.00051088	RN7SL20P	misc_RNA
ENSG00000264000.1	1.43388	-1.59617	0.259206	-6.15791	7.37112e-10	9.92093e-09	AP005059.1	lncRNA
ENSG00000248350.1	1.75985	-1.59527	0.265142	-6.01665	1.78062e-09	2.19912e-08	AC010265.1	processed_pseudogene
ENSG00000251309.1	0.607243	-1.59507	0.361148	-4.41666	1.00236e-05	5.1167e-05	AP002075.1	lncRNA
ENSG00000251054.1	1.22285	-1.5949	0.263139	-6.06105	1.35235e-09	1.70569e-08	AC008883.2	lncRNA
ENSG00000224972.1	1.31945	-1.59321	0.260837	-6.10808	1.00838e-09	1.31122e-08	AL513412.1	lncRNA
ENSG00000115112.8	1489.32	-1.59301	0.19131	-8.32682	8.30426e-17	4.34977e-15	TFCP2L1	protein_coding
ENSG00000259196.1	1.29399	-1.59232	0.245206	-6.49378	8.37069e-11	1.37169e-09	HMBOX1-IT1	lncRNA
ENSG00000252062.1	0.682937	-1.59156	0.329485	-4.83045	1.36228e-06	8.5947e-06	RNU6-469P	snRNA
ENSG00000243398.3	1.46344	-1.59153	0.29168	-5.45644	4.85788e-08	4.33268e-07	RN7SL141P	misc_RNA
ENSG00000265894.2	0.669432	-1.59138	0.451962	-3.52105	0.000429848	0.00144591	RN7SL357P	misc_RNA
ENSG00000267005.1	4.63505	-1.58958	0.213878	-7.43219	1.06815e-13	3.14532e-12	AC002984.1	processed_pseudogene
ENSG00000242986.2	1.03277	-1.58877	0.295472	-5.37706	7.57113e-08	6.44407e-07	RPL21P99	processed_pseudogene
ENSG00000260658.6	14.1295	-1.58827	0.186394	-8.52102	1.58155e-17	9.42642e-16	AC138305.1	lncRNA
ENSG00000244618.3	1.35464	-1.58803	0.262085	-6.05924	1.36763e-09	1.72349e-08	RN7SL334P	misc_RNA
ENSG00000241943.2	0.388992	-1.58708	0.793914	-1.99905	0.0456027	0.0844192	RN7SL188P	misc_RNA
ENSG00000222385.1	0.659849	-1.58688	0.40604	-3.90818	9.29924e-05	0.000370762	RN7SKP158	misc_RNA
ENSG00000131721.6	1.93589	-1.58627	0.248443	-6.38487	1.71542e-10	2.64276e-09	RHOXF2	protein_coding
ENSG00000264796.1	0.587374	-1.58552	0.381231	-4.15895	3.19717e-05	0.000143758	MIR5009	miRNA
ENSG00000206935.1	0.880013	-1.58511	0.308841	-5.13245	2.85991e-07	2.13358e-06	RNU6-514P	snRNA
ENSG00000250266.2	12.3761	-1.58484	0.362875	-4.36747	1.25695e-05	6.25707e-05	LINC01612	lncRNA
ENSG00000252233.1	0.447433	-1.58409	0.533335	-2.97015	0.0029765	0.00794691	RN7SKP253	misc_RNA
ENSG00000279444.1	8.18363	-1.58372	0.172744	-9.168	4.81862e-20	4.46957e-18	AC135584.1	TEC
ENSG00000244710.3	0.495092	-1.58365	0.471886	-3.35601	0.000790755	0.00247865	RN7SL47P	misc_RNA
ENSG00000253079.1	0.517717	-1.58194	0.453468	-3.48854	0.000485658	0.00161293	NRON	misc_RNA
ENSG00000137766.17	30.2424	-1.58085	0.188015	-8.40807	4.16801e-17	2.32255e-15	UNC13C	protein_coding
ENSG00000253043.1	0.928799	-1.57964	0.335873	-4.70309	2.56256e-06	1.50976e-05	RNU7-181P	snRNA
ENSG00000232162.1	1.00334	-1.57787	0.346558	-4.55296	5.28956e-06	2.89214e-05	USP12-AS1	lncRNA
ENSG00000243723.3	1.06003	-1.57698	0.268104	-5.88197	4.05403e-09	4.61662e-08	RN7SL393P	misc_RNA
ENSG00000199366.1	1.06355	-1.57679	0.273543	-5.76431	8.1991e-09	8.66307e-08	Y_RNA	misc_RNA
ENSG00000278487.1	1.24223	-1.5753	0.282094	-5.58431	2.34633e-08	2.23638e-07	AC106800.3	processed_pseudogene
ENSG00000233851.1	1.59761	-1.57516	0.267526	-5.88787	3.91206e-09	4.47181e-08	LATS2-AS1	lncRNA
ENSG00000267603.1	1.92976	-1.57495	0.234623	-6.71268	1.91084e-11	3.56863e-10	LINC01028	lncRNA
ENSG00000285553.1	0.749691	-1.5739	0.331628	-4.74598	2.075e-06	1.25217e-05	AL137182.1	lncRNA
ENSG00000266668.1	1.08709	-1.57389	0.252618	-6.23033	4.6546e-10	6.5457e-09	MIR5692C2	miRNA
ENSG00000201662.1	0.657068	-1.57142	0.430138	-3.6533	0.000258892	0.000919999	RNU6-60P	snRNA
ENSG00000227072.1	1.25419	-1.56966	0.277704	-5.65229	1.58325e-08	1.55781e-07	AL353706.1	processed_pseudogene
ENSG00000244389.3	0.503555	-1.5685	0.48071	-3.26288	0.00110288	0.00332432	RN7SL242P	misc_RNA
ENSG00000265123.2	2.20417	-1.56798	0.274833	-5.7052	1.16207e-08	1.18098e-07	RN7SL200P	misc_RNA
ENSG00000265735.2	6.25738	-1.56794	0.187284	-8.37201	5.66454e-17	3.08316e-15	RN7SL5P	misc_RNA
ENSG00000200999.1	0.892261	-1.56735	0.330828	-4.73766	2.16199e-06	1.30096e-05	AC107390.1	snoRNA
ENSG00000235020.5	4.27539	-1.56724	0.20058	-7.81356	5.5594e-15	2.05412e-13	AL390783.1	lncRNA
ENSG00000099937.11	27.3216	-1.56689	0.17643	-8.88108	6.62154e-19	4.97151e-17	SERPIND1	protein_coding
ENSG00000202412.1	0.570809	-1.56667	0.40306	-3.88695	0.000101512	0.00040107	RNY3P13	misc_RNA
ENSG00000224707.1	0.776011	-1.56645	0.365604	-4.28455	1.83109e-05	8.74175e-05	E2F3-IT1	lncRNA
ENSG00000233157.1	1.04439	-1.56614	0.269717	-5.80662	6.37473e-09	6.93489e-08	Z97055.1	processed_pseudogene
ENSG00000255580.1	0.631472	-1.56481	0.413815	-3.78143	0.000155931	0.000586263	AP000462.1	lncRNA
ENSG00000279562.1	0.591466	-1.5645	0.349645	-4.47454	7.65754e-06	4.02143e-05	AC090617.8	TEC
ENSG00000235292.2	0.685637	-1.56437	0.382306	-4.09192	4.27815e-05	0.000186103	AL109838.1	lncRNA
ENSG00000200151.1	0.467375	-1.56433	1.09758	-1.42526	0.154083	0.233222	RN7SKP231	misc_RNA
ENSG00000270772.1	0.946038	-1.56245	0.298675	-5.23125	1.68368e-07	1.32442e-06	PDHA1P1	processed_pseudogene
ENSG00000176945.17	2666.85	-1.56235	0.14399	-10.8504	1.98593e-27	5.56098e-25	MUC20	protein_coding
ENSG00000248339.1	1.21915	-1.56225	0.339184	-4.60591	4.10658e-06	2.30155e-05	LINC02504	lncRNA
ENSG00000266978.1	1.77453	-1.56143	0.234911	-6.64692	2.99299e-11	5.40596e-10	AC011511.2	lncRNA
ENSG00000122872.8	0.657825	-1.56102	0.405945	-3.84539	0.000120362	0.000466721	ARL4AP1	processed_pseudogene
ENSG00000263857.1	1.11819	-1.56058	0.304259	-5.12911	2.91119e-07	2.16784e-06	MIR4729	miRNA
ENSG00000236460.1	0.373417	-1.56029	0.897678	-1.73814	0.0821863	0.138784	SNX2P2	processed_pseudogene
ENSG00000229294.1	0.862756	-1.55939	0.330093	-4.7241	2.31142e-06	1.37903e-05	AL139294.1	lncRNA
ENSG00000274328.1	0.5959	-1.55934	0.372002	-4.19176	2.76803e-05	0.000126401	AC007551.2	processed_pseudogene
ENSG00000260089.2	1.31363	-1.55824	0.30748	-5.06778	4.0248e-07	2.89914e-06	ADAM3B	processed_pseudogene
ENSG00000084453.16	33.3802	-1.55675	0.233909	-6.65539	2.82555e-11	5.13268e-10	SLCO1A2	protein_coding
ENSG00000223911.1	0.647458	-1.55643	0.367722	-4.23262	2.30984e-05	0.000107484	AC009480.1	lncRNA
ENSG00000278469.1	0.676926	-1.55517	0.339812	-4.57656	4.72683e-06	2.61465e-05	Metazoa_SRP	misc_RNA
ENSG00000184270.6	1.49205	-1.55498	0.287087	-5.41642	6.08041e-08	5.29056e-07	H2AC21	protein_coding
ENSG00000185028.4	91.0419	-1.5549	0.20012	-7.76984	7.85856e-15	2.83539e-13	LRRC14B	protein_coding
ENSG00000237919.5	0.647242	-1.55429	0.310054	-5.01297	5.35966e-07	3.73382e-06	LRRC7-AS1	lncRNA
ENSG00000262020.1	1.81887	-1.55369	0.260541	-5.96333	2.47153e-09	2.9525e-08	AC007014.1	lncRNA
ENSG00000205500.8	6.65323	-1.55204	0.177626	-8.73767	2.37966e-18	1.625e-16	MAPRE3-AS1	lncRNA
ENSG00000276396.1	0.706438	-1.55129	0.331297	-4.68248	2.8342e-06	1.65015e-05	Metazoa_SRP	misc_RNA
ENSG00000248629.1	1.02171	-1.54998	0.313563	-4.9431	7.68892e-07	5.15407e-06	AC092608.1	lncRNA
ENSG00000255178.1	1.27567	-1.54898	0.258899	-5.98294	2.1914e-09	2.65925e-08	LINC02720	lncRNA
ENSG00000254129.1	0.880616	-1.54896	0.287275	-5.3919	6.97151e-08	5.97943e-07	AC108449.1	lncRNA
ENSG00000285774.3	13.4968	-1.54871	0.173485	-8.92703	4.37586e-19	3.40011e-17	AL133444.1	lncRNA
ENSG00000280027.1	8.19129	-1.54861	0.185633	-8.34235	7.28308e-17	3.85112e-15	AC007342.9	TEC
ENSG00000205279.8	109.565	-1.54766	0.26536	-5.83231	5.46649e-09	6.02735e-08	CTXN3	protein_coding
ENSG00000244139.3	0.529351	-1.5468	0.479712	-3.22443	0.00126224	0.0037401	RN7SL397P	misc_RNA
ENSG00000197721.17	37.1656	-1.54645	0.164923	-9.37682	6.79902e-21	7.20745e-19	CR1L	protein_coding
ENSG00000255219.1	0.759078	-1.54603	0.28594	-5.40683	6.41517e-08	5.55146e-07	AP000755.2	lncRNA
ENSG00000285847.2	16.0267	-1.54581	0.161416	-9.57652	1.00374e-21	1.24483e-19	AL713852.1	lncRNA
ENSG00000238840.1	3.17276	-1.54578	0.202232	-7.64358	2.11262e-14	7.03518e-13	U8	snoRNA
ENSG00000207493.1	1.6237	-1.54544	0.234883	-6.57962	4.71637e-11	8.11387e-10	SNORA46	snoRNA
ENSG00000241991.1	1.23816	-1.54428	0.274834	-5.61894	1.92133e-08	1.86288e-07	AC114982.1	processed_pseudogene
ENSG00000007216.15	58.6571	-1.54402	0.216112	-7.14453	9.03048e-13	2.18513e-11	SLC13A2	protein_coding
ENSG00000249020.1	1.73092	-1.54386	0.238627	-6.46978	9.81484e-11	1.58731e-09	SNORA58	snoRNA
ENSG00000183571.11	7.90112	-1.54252	0.187746	-8.21603	2.10358e-16	1.02247e-14	PGPEP1L	protein_coding
ENSG00000187229.3	1.56989	-1.54204	0.351552	-4.38638	1.15252e-05	5.78964e-05	AC100800.1	lncRNA
ENSG00000221214.1	0.510559	-1.54193	0.414099	-3.72357	0.000196424	0.000719665	MIR548E	miRNA
ENSG00000231795.1	2.30622	-1.54167	0.208927	-7.37898	1.59507e-13	4.52341e-12	ITCH-IT1	lncRNA
ENSG00000215720.4	5.15459	-1.5409	0.207405	-7.42942	1.09077e-13	3.20134e-12	MFFP1	processed_pseudogene
ENSG00000235263.1	2.80956	-1.54065	0.270775	-5.68978	1.27205e-08	1.28193e-07	AL928921.1	lncRNA
ENSG00000271710.1	0.559463	-1.54026	0.545453	-2.82381	0.00474558	0.01195	NDUFA8P1	processed_pseudogene
ENSG00000225752.1	0.882377	-1.53985	0.288941	-5.32929	9.85996e-08	8.1902e-07	AL023581.1	lncRNA
ENSG00000197444.10	5699.67	-1.53895	0.140018	-10.9911	4.21798e-28	1.28628e-25	OGDHL	protein_coding
ENSG00000217041.1	1.32694	-1.53796	0.292768	-5.25318	1.49498e-07	1.18902e-06	AL512430.2	processed_pseudogene
ENSG00000263740.2	16.2331	-1.53667	0.173374	-8.86333	7.76592e-19	5.80137e-17	RN7SL4P	misc_RNA
ENSG00000275239.4	0.751312	-1.53657	0.304669	-5.0434	4.57341e-07	3.24446e-06	FAM242F	lncRNA
ENSG00000257120.1	0.714054	-1.53583	0.336762	-4.56056	5.10164e-06	2.79895e-05	AL356756.1	lncRNA
ENSG00000239794.3	0.495193	-1.53481	0.525011	-2.92339	0.00346241	0.00906858	RN7SL653P	misc_RNA
ENSG00000232474.1	0.793909	-1.53393	0.25094	-6.11272	9.79467e-10	1.27735e-08	NCKAP5-IT1	lncRNA
ENSG00000237074.2	0.716026	-1.53338	0.299169	-5.12548	2.96788e-07	2.20675e-06	AL596218.1	lncRNA
ENSG00000281566.3	1.18949	-1.53327	0.334164	-4.58837	4.4671e-06	2.48239e-05	AL157778.1	lncRNA
ENSG00000256721.1	1.63579	-1.53315	0.314887	-4.86889	1.12225e-06	7.22258e-06	CACNA1C-IT3	lncRNA
ENSG00000158816.15	22.2596	-1.53292	0.206346	-7.42889	1.09513e-13	3.20989e-12	VWA5B1	protein_coding
ENSG00000199856.2	0.739774	-1.53164	0.305103	-5.02008	5.16488e-07	3.61566e-06	U3	snoRNA
ENSG00000267259.1	7.68925	-1.5312	0.400013	-3.82789	0.000129247	0.000496547	ERVE-1	lncRNA
ENSG00000165192.14	6.84991	-1.53074	0.160866	-9.51562	1.80641e-21	2.12769e-19	ASB11	protein_coding
ENSG00000254489.2	3.51528	-1.52921	0.266428	-5.73968	9.48529e-09	9.84414e-08	MPPED2-AS1	lncRNA
ENSG00000236197.4	4.95958	-1.5292	0.200028	-7.64494	2.09039e-14	6.98202e-13	PPP1R9A-AS1	lncRNA
ENSG00000286253.1	0.734725	-1.52848	0.386284	-3.95688	7.5936e-05	0.000309719	AC096763.1	lncRNA
ENSG00000242595.1	0.468601	-1.52602	0.469382	-3.25113	0.00114948	0.00344451	RPL26P26	processed_pseudogene
ENSG00000287268.1	2.16965	-1.52568	0.242321	-6.2961	3.05218e-10	4.47308e-09	AL050350.1	lncRNA
ENSG00000266977.2	0.718501	-1.52537	0.301345	-5.06186	4.1519e-07	2.98153e-06	AC006504.2	lncRNA
ENSG00000219384.1	0.782569	-1.52506	0.331142	-4.60546	4.11563e-06	2.30549e-05	AL138880.1	processed_pseudogene
ENSG00000265421.1	0.5184	-1.52458	0.470834	-3.23804	0.00120352	0.00358833	AC016601.1	miRNA
ENSG00000228995.1	0.873871	-1.52314	0.266524	-5.71484	1.0981e-08	1.12419e-07	MTND1P9	processed_pseudogene
ENSG00000279814.1	2.04124	-1.52179	0.236335	-6.43914	1.20149e-10	1.90506e-09	AC010997.6	TEC
ENSG00000254839.1	1.21188	-1.52151	0.291701	-5.21598	1.82844e-07	1.42671e-06	AF131215.3	lncRNA
ENSG00000207871.2	0.531715	-1.52036	0.296402	-5.12939	2.90684e-07	2.16496e-06	MIR513B	miRNA
ENSG00000250164.1	0.470919	-1.51931	0.421471	-3.60477	0.000312433	0.00108845	AC022447.7	lncRNA
ENSG00000253015.1	0.873256	-1.51884	0.297541	-5.10466	3.3139e-07	2.43715e-06	RN7SKP64	misc_RNA
ENSG00000231882.1	1.70924	-1.51715	0.228961	-6.62622	3.44398e-11	6.11389e-10	F10-AS1	lncRNA
ENSG00000252985.1	0.514554	-1.51687	0.406016	-3.73599	0.000186981	0.000688581	SNORD116	snoRNA
ENSG00000138678.11	1179.38	-1.51639	0.126162	-12.0194	2.80959e-33	1.5255e-30	GPAT3	protein_coding
ENSG00000206908.1	1.01158	-1.51585	0.372945	-4.06454	4.81275e-05	0.000206533	RNU1-136P	snRNA
ENSG00000229623.1	1.26256	-1.51543	0.300097	-5.0498	4.4228e-07	3.15066e-06	METTL21AP1	processed_pseudogene
ENSG00000259073.1	1.98069	-1.51501	0.286063	-5.29606	1.18329e-07	9.64369e-07	FOXN3-AS2	lncRNA
ENSG00000242341.3	1.76786	-1.5148	0.287757	-5.26416	1.40829e-07	1.12914e-06	RN7SL646P	misc_RNA
ENSG00000214628.3	0.583316	-1.5137	0.387191	-3.90945	9.25065e-05	0.000369122	NDUFB5P2	processed_pseudogene
ENSG00000225650.2	0.93977	-1.51307	0.322828	-4.68693	2.77331e-06	1.61787e-05	EIF2S2P5	processed_pseudogene
ENSG00000251703.1	0.90838	-1.5129	0.313775	-4.82162	1.42396e-06	8.94835e-06	RNU6-998P	snRNA
ENSG00000237331.1	2.87615	-1.51274	0.230314	-6.56814	5.09462e-11	8.71074e-10	XIAP-AS1	lncRNA
ENSG00000258933.1	0.568469	-1.51135	0.481867	-3.13644	0.00171014	0.0048808	LINC02279	lncRNA
ENSG00000225179.2	1.90245	-1.51115	0.343486	-4.39945	1.08526e-05	5.48955e-05	LINC00457	lncRNA
ENSG00000234562.1	1.27723	-1.50978	0.262612	-5.74911	8.97144e-09	9.36762e-08	TPMTP2	processed_pseudogene
ENSG00000145192.13	8.34501	-1.50869	0.272272	-5.54112	3.00537e-08	2.79816e-07	AHSG	protein_coding
ENSG00000225934.2	1.68835	-1.50829	0.243942	-6.18298	6.29015e-10	8.58279e-09	FAM133FP	processed_pseudogene
ENSG00000270751.1	1.01379	-1.50819	0.266519	-5.65885	1.52389e-08	1.50573e-07	FBXW7-AS1	lncRNA
ENSG00000241462.1	1.31344	-1.50783	0.333694	-4.51861	6.22468e-06	3.33945e-05	AC100832.1	processed_pseudogene
ENSG00000233526.1	1.34932	-1.50656	0.297675	-5.06108	4.16891e-07	2.99182e-06	RFC5P1	processed_pseudogene
ENSG00000265801.1	1.16809	-1.50578	0.261762	-5.75247	8.79479e-09	9.20476e-08	AC069366.2	lncRNA
ENSG00000238966.1	0.639189	-1.50378	0.304825	-4.93324	8.0876e-07	5.39937e-06	AC090571.1	snoRNA
ENSG00000184084.7	2.87624	-1.50296	0.182517	-8.23462	1.80132e-16	8.92107e-15	AC091868.1	processed_pseudogene
ENSG00000201758.1	0.956954	-1.5023	0.383545	-3.91687	8.97066e-05	0.000359166	RN7SKP55	misc_RNA
ENSG00000279733.1	0.496113	-1.50076	0.437058	-3.43377	0.000595253	0.00192689	AP001642.1	TEC
ENSG00000259013.2	1.11902	-1.50051	0.310425	-4.83372	1.34007e-06	8.46658e-06	AL118558.2	processed_pseudogene
ENSG00000180251.5	19.8989	-1.50048	0.270087	-5.55552	2.7678e-08	2.59935e-07	SLC9A4	protein_coding
ENSG00000252122.1	0.882911	-1.49958	0.286325	-5.23733	1.62915e-07	1.28608e-06	AC009163.2	snoRNA
ENSG00000202517.1	0.637904	-1.4982	0.340005	-4.40642	1.05093e-05	5.33893e-05	AC099331.1	snoRNA
ENSG00000202172.1	0.605734	-1.49652	0.350339	-4.27164	1.94042e-05	9.20744e-05	RNU6-1327P	snRNA
ENSG00000255565.1	1.74849	-1.49624	0.234803	-6.37234	1.86162e-10	2.84438e-09	AC073651.1	lncRNA
ENSG00000232981.1	0.876987	-1.49585	0.288627	-5.18262	2.18785e-07	1.67745e-06	MTCO1P51	unprocessed_pseudogene
ENSG00000233705.7	8.68819	-1.49525	0.162714	-9.18941	3.94994e-20	3.6946e-18	SLC26A4-AS1	lncRNA
ENSG00000231384.1	2.49433	-1.49517	0.248076	-6.02708	1.66944e-09	2.07564e-08	AC007919.2	processed_pseudogene
ENSG00000183287.14	154.631	-1.49499	0.201346	-7.42499	1.12789e-13	3.28941e-12	CCBE1	protein_coding
ENSG00000248210.2	1.08376	-1.49473	0.259889	-5.75142	8.8496e-09	9.25328e-08	LINC02355	lncRNA
ENSG00000164188.9	119.926	-1.49453	0.148281	-10.079	6.83852e-24	1.21303e-21	RANBP3L	protein_coding
ENSG00000199381.1	0.727637	-1.49426	0.409339	-3.65041	0.00026182	0.000929094	RNU6-79P	snRNA
ENSG00000264754.1	1.18022	-1.49407	0.307691	-4.85574	1.19941e-06	7.65609e-06	AC110921.1	lncRNA
ENSG00000227836.1	1.7365	-1.49376	0.225443	-6.6259	3.45143e-11	6.12244e-10	AC008850.1	processed_pseudogene
ENSG00000240074.1	0.832729	-1.49353	0.276012	-5.41112	6.26312e-08	5.4364e-07	RPL9P30	processed_pseudogene
ENSG00000241291.3	0.421959	-1.49309	0.578324	-2.58176	0.00982991	0.0225736	RN7SL791P	misc_RNA
ENSG00000251148.1	2.39343	-1.49288	0.212675	-7.01955	2.22583e-12	5.0152e-11	AL158068.2	lncRNA
ENSG00000261424.1	0.887496	-1.49223	0.298504	-4.99903	5.76183e-07	3.9871e-06	ATP5PBP7	processed_pseudogene
ENSG00000250955.1	0.546709	-1.49156	0.403724	-3.69452	0.000220305	0.000797126	AC008592.2	lncRNA
ENSG00000287630.1	0.995257	-1.49105	0.358521	-4.15891	3.19774e-05	0.000143767	AC011370.1	lncRNA
ENSG00000207092.1	0.752772	-1.4905	0.324361	-4.59519	4.32349e-06	2.41161e-05	Y_RNA	misc_RNA
ENSG00000254895.2	0.617403	-1.48983	0.342726	-4.34701	1.38007e-05	6.79775e-05	MTCO3P15	processed_pseudogene
ENSG00000237365.1	0.553687	-1.48939	0.449252	-3.31527	0.000915559	0.00282056	AL512330.1	lncRNA
ENSG00000227757.3	5.19209	-1.48888	0.260959	-5.70542	1.16054e-08	1.17997e-07	AP000282.1	lncRNA
ENSG00000227211.2	0.924916	-1.48837	0.287553	-5.17599	2.26701e-07	1.7301e-06	H3P45	processed_pseudogene
ENSG00000242094.1	2.93498	-1.48759	0.203716	-7.30231	2.82866e-13	7.63739e-12	FOXP1-IT1	lncRNA
ENSG00000226878.2	0.958295	-1.48747	0.335484	-4.43381	9.25811e-06	4.7598e-05	GSTM3P2	processed_pseudogene
ENSG00000263479.2	0.420009	-1.48737	0.827907	-1.79654	0.0724086	0.124752	RN7SL509P	misc_RNA
ENSG00000199630.1	0.737851	-1.48559	0.326706	-4.54719	5.43678e-06	2.96463e-05	Y_RNA	misc_RNA
ENSG00000260386.6	2.59411	-1.48444	0.293054	-5.06542	4.07498e-07	2.93194e-06	LDC1P	transcribed_unitary_pseudogene
ENSG00000131982.5	0.853224	-1.48401	0.389199	-3.81299	0.000137295	0.000523622	UBE2L2	processed_pseudogene
ENSG00000232379.1	0.704706	-1.48206	0.359649	-4.12085	3.7748e-05	0.000166566	RPL22P23	processed_pseudogene
ENSG00000267732.2	2.18647	-1.48173	0.275073	-5.38668	7.17707e-08	6.13683e-07	AC006305.3	lncRNA
ENSG00000233848.1	1.00069	-1.48149	0.301136	-4.91966	8.66933e-07	5.72848e-06	AL513188.1	lncRNA
ENSG00000177938.5	0.877583	-1.48132	0.417532	-3.54781	0.000388452	0.00132205	CAPZA3	protein_coding
ENSG00000238778.1	0.411613	-1.48025	0.737358	-2.00751	0.0446956	0.0830127	RNU7-80P	snRNA
ENSG00000257494.1	0.528743	-1.4787	0.391633	-3.77574	0.000159535	0.000598046	AC004217.1	lncRNA
ENSG00000237838.1	5.11002	-1.47774	0.177881	-8.30746	9.77703e-17	5.00924e-15	AC092422.1	lncRNA
ENSG00000287118.1	0.514983	-1.4776	0.396965	-3.72224	0.000197462	0.000722757	AC008056.3	lncRNA
ENSG00000252982.1	0.809311	-1.47758	0.304178	-4.8576	1.18815e-06	7.59184e-06	RN7SKP234	misc_RNA
ENSG00000272533.1	4.45572	-1.47729	0.196765	-7.5079	6.00833e-14	1.84616e-12	SNORA28	snoRNA
ENSG00000259499.1	2.77993	-1.47592	0.189118	-7.80422	5.98713e-15	2.19757e-13	AC090519.1	lncRNA
ENSG00000253911.1	0.848918	-1.47563	0.270632	-5.45251	4.96635e-08	4.4188e-07	AP003467.1	lncRNA
ENSG00000242863.3	0.41818	-1.47523	0.799424	-1.84536	0.064985	0.11383	RN7SL677P	misc_RNA
ENSG00000241981.2	1.81064	-1.47462	0.223152	-6.60815	3.89161e-11	6.80009e-10	AF213884.1	processed_pseudogene
ENSG00000101638.14	75.094	-1.4743	0.147066	-10.0248	1.18615e-23	2.02704e-21	ST8SIA5	protein_coding
ENSG00000252039.1	3.04312	-1.47388	0.222545	-6.62285	3.52346e-11	6.23015e-10	RNU6-287P	snRNA
ENSG00000070729.14	12.3174	-1.47327	0.202408	-7.27871	3.37025e-13	8.95843e-12	CNGB1	protein_coding
ENSG00000266079.5	7.63979	-1.47299	0.162598	-9.05911	1.31523e-19	1.13265e-17	SNORA59B	snoRNA
ENSG00000285850.1	1.86507	-1.47291	0.253865	-5.80192	6.556e-09	7.1124e-08	AC009152.3	lncRNA
ENSG00000286947.1	0.800923	-1.47168	0.318126	-4.62608	3.72648e-06	2.10444e-05	AC022467.2	lncRNA
ENSG00000244703.3	1.09918	-1.46885	0.301847	-4.86619	1.13771e-06	7.31146e-06	CD46P1	unprocessed_pseudogene
ENSG00000255081.1	0.744386	-1.46861	0.314436	-4.6706	3.00316e-06	1.73604e-05	AP003168.2	lncRNA
ENSG00000237628.2	0.823291	-1.46855	0.331078	-4.43566	9.17894e-06	4.72456e-05	MTCO2P19	processed_pseudogene
ENSG00000260519.1	1.08801	-1.46844	0.233762	-6.28178	3.34715e-10	4.86534e-09	AC096734.2	lncRNA
ENSG00000256557.1	0.98696	-1.46731	0.260459	-5.63355	1.76535e-08	1.72139e-07	AC009509.3	processed_pseudogene
ENSG00000163833.8	5.5216	-1.46712	0.179015	-8.19553	2.49493e-16	1.19571e-14	FBXO40	protein_coding
ENSG00000226242.1	1.46739	-1.46685	0.37368	-3.92543	8.65754e-05	0.000348014	RPS17P8	processed_pseudogene
ENSG00000284902.1	0.899166	-1.46656	0.291013	-5.03948	4.66788e-07	3.30305e-06	AC074008.1	lncRNA
ENSG00000239504.3	0.796864	-1.46653	0.423599	-3.46207	0.000536037	0.00175808	RN7SL583P	misc_RNA
ENSG00000258699.1	1.38261	-1.46567	0.308562	-4.74999	2.03431e-06	1.23162e-05	AL357093.1	lncRNA
ENSG00000280321.1	2.7532	-1.46521	0.204334	-7.17069	7.46222e-13	1.83457e-11	AC129502.1	TEC
ENSG00000276368.2	2.3736	-1.46516	0.25701	-5.7008	1.19248e-08	1.20968e-07	H2AC14	protein_coding
ENSG00000244236.3	0.839599	-1.46433	0.313121	-4.67655	2.9174e-06	1.6935e-05	RN7SL604P	misc_RNA
ENSG00000263155.6	41.4113	-1.46432	0.138124	-10.6015	2.93334e-26	7.29616e-24	MYZAP	protein_coding
ENSG00000201821.1	0.589236	-1.4638	0.38173	-3.83465	0.000125744	0.000485011	RNU4-9P	snRNA
ENSG00000139055.7	297.209	-1.46345	0.134528	-10.8784	1.46083e-27	4.16722e-25	ERP27	protein_coding
ENSG00000275803.1	0.886858	-1.46261	0.337888	-4.32869	1.49996e-05	7.32827e-05	RN7SL736P	misc_RNA
ENSG00000226953.8	24.9387	-1.46102	0.136485	-10.7047	9.67583e-27	2.49016e-24	NCKAP5-AS2	lncRNA
ENSG00000212205.1	1.82779	-1.46045	0.240216	-6.07971	1.20402e-09	1.5382e-08	Y_RNA	misc_RNA
ENSG00000228627.2	1.91394	-1.45961	0.236417	-6.17388	6.66337e-10	9.04216e-09	AC009468.1	lncRNA
ENSG00000222287.1	1.41691	-1.45943	0.259758	-5.61842	1.92707e-08	1.86722e-07	RNU6-1043P	snRNA
ENSG00000286108.1	1.22088	-1.45924	0.267932	-5.44629	5.14321e-08	4.55613e-07	AL359916.1	lncRNA
ENSG00000287702.1	8.92375	-1.45837	0.307593	-4.74122	2.12436e-06	1.2797e-05	AC002057.2	lncRNA
ENSG00000249695.6	99.4131	-1.45728	0.187608	-7.76766	7.99493e-15	2.88225e-13	AC026369.1	lncRNA
ENSG00000248553.1	0.60227	-1.45728	0.351073	-4.15093	3.31129e-05	0.000148229	OR52H2P	unitary_pseudogene
ENSG00000238961.1	5.83245	-1.45626	0.159273	-9.14319	6.06367e-20	5.48725e-18	SNORA47	snoRNA
ENSG00000259669.6	2.35747	-1.45585	0.297235	-4.89796	9.68345e-07	6.33186e-06	AC084759.2	lncRNA
ENSG00000243658.1	0.556173	-1.45518	0.395188	-3.68225	0.000231181	0.000832015	MTND5P16	unprocessed_pseudogene
ENSG00000155052.14	141.192	-1.45507	0.227815	-6.38707	1.69094e-10	2.60865e-09	CNTNAP5	protein_coding
ENSG00000138798.13	636.132	-1.45406	0.164527	-8.83778	9.76368e-19	7.16159e-17	EGF	protein_coding
ENSG00000041515.16	27.9399	-1.45403	0.148813	-9.7708	1.50256e-22	2.1934e-20	MYO16	protein_coding
ENSG00000280382.1	1.90781	-1.45392	0.210849	-6.89555	5.36564e-12	1.11685e-10	AC096920.1	lncRNA
ENSG00000249618.6	3.69019	-1.45391	0.2433	-5.9758	2.2897e-09	2.75944e-08	LINC02465	lncRNA
ENSG00000267193.7	6.3219	-1.45353	0.159655	-9.1042	8.69048e-20	7.67711e-18	AC091151.1	lncRNA
ENSG00000257005.1	0.717878	-1.45244	0.257987	-5.62991	1.80309e-08	1.75511e-07	AC027667.1	processed_pseudogene
ENSG00000243954.3	0.958702	-1.45205	0.35934	-4.04088	5.32502e-05	0.000225581	RN7SL743P	misc_RNA
ENSG00000196104.11	6.08828	-1.45165	0.200859	-7.22718	4.93129e-13	1.26618e-11	SPOCK3	protein_coding
ENSG00000228211.2	0.382845	-1.45137	0.885676	-1.63872	0.101272	0.165018	HYAL6P	unitary_pseudogene
ENSG00000279991.1	1.96896	-1.44978	0.283632	-5.11151	3.19602e-07	2.35825e-06	AC009044.1	TEC
ENSG00000213431.4	1.64471	-1.44963	0.29658	-4.88781	1.01962e-06	6.62533e-06	AC080014.1	processed_pseudogene
ENSG00000201564.1	0.751587	-1.44931	0.362888	-3.99383	6.50144e-05	0.000269294	RN7SKP50	misc_RNA
ENSG00000272020.1	0.648881	-1.44884	0.322041	-4.49894	6.82918e-06	3.62922e-05	RNU1-30P	snRNA
ENSG00000102387.16	18.1745	-1.4483	0.160703	-9.01233	2.01728e-19	1.68826e-17	TAF7L	protein_coding
ENSG00000111218.12	7.38881	-1.44769	0.173354	-8.3511	6.76315e-17	3.59756e-15	PRMT8	protein_coding
ENSG00000251805.1	0.500373	-1.44762	0.396559	-3.65046	0.000261768	0.000929031	AC009228.2	scaRNA
ENSG00000217083.1	0.968923	-1.44725	0.302745	-4.78043	1.74925e-06	1.07423e-05	MTCO2P33	processed_pseudogene
ENSG00000267868.1	9.05635	-1.44636	0.17842	-8.10649	5.21031e-16	2.34796e-14	AL356740.1	lncRNA
ENSG00000232986.1	0.673786	-1.446	0.289894	-4.98804	6.09943e-07	4.19859e-06	AL139081.1	lncRNA
ENSG00000202141.1	0.466295	-1.44576	0.508344	-2.84406	0.00445422	0.0113032	Y_RNA	misc_RNA
ENSG00000135824.12	5.17537	-1.44499	0.197374	-7.32107	2.45994e-13	6.72338e-12	RGS8	protein_coding
ENSG00000223881.1	0.519852	-1.44392	0.490994	-2.94082	0.00327349	0.00863627	AL157402.1	lncRNA
ENSG00000279702.1	0.473714	-1.4432	0.506575	-2.84893	0.00438659	0.0111501	AL356266.1	TEC
ENSG00000166220.12	2.9547	-1.44284	0.233798	-6.17131	6.77251e-10	9.18466e-09	TBATA	protein_coding
ENSG00000285993.1	0.739452	-1.44109	0.316068	-4.55942	5.12952e-06	2.81362e-05	AC018931.1	lncRNA
ENSG00000285782.2	1.11592	-1.44013	0.225627	-6.3828	1.73876e-10	2.67501e-09	AC116099.1	lncRNA
ENSG00000279439.1	1.26948	-1.43828	0.31337	-4.5897	4.43885e-06	2.46792e-05	AC105114.1	TEC
ENSG00000250730.2	0.955275	-1.4369	0.310122	-4.63335	3.59794e-06	2.03961e-05	HMGB3P3	processed_pseudogene
ENSG00000250045.2	1.5577	-1.43628	0.26465	-5.42708	5.72827e-08	5.01652e-07	CBX3P3	processed_pseudogene
ENSG00000237387.1	1.15423	-1.43392	0.29783	-4.81455	1.47529e-06	9.23831e-06	AL022329.2	lncRNA
ENSG00000242134.2	0.833361	-1.43339	0.316878	-4.52349	6.0829e-06	3.27325e-05	RPL5P13	processed_pseudogene
ENSG00000231866.2	1.21334	-1.43323	0.201237	-7.12207	1.06315e-12	2.5476e-11	AC099677.2	processed_pseudogene
ENSG00000234149.1	0.517132	-1.43241	0.374823	-3.82156	0.000132609	0.000507754	AC018511.2	lncRNA
ENSG00000200883.1	0.623724	-1.43162	0.330818	-4.3275	1.50809e-05	7.35994e-05	Y_RNA	misc_RNA
ENSG00000257666.1	1.50608	-1.43123	0.240743	-5.94507	2.76338e-09	3.26697e-08	CBX3P5	processed_pseudogene
ENSG00000251332.1	3.91537	-1.43076	0.177449	-8.06296	7.44717e-16	3.25708e-14	PSME2P4	processed_pseudogene
ENSG00000261469.1	5.32842	-1.43053	0.162222	-8.81834	1.16168e-18	8.38276e-17	AC020978.4	lncRNA
ENSG00000200840.1	0.582339	-1.42908	0.353232	-4.04573	5.21606e-05	0.000221535	RNU6-82P	snRNA
ENSG00000217680.1	0.519839	-1.42813	0.349642	-4.08455	4.4163e-05	0.000191309	UBE2V1P15	processed_pseudogene
ENSG00000253126.1	0.621667	-1.42668	0.497922	-2.86527	0.00416647	0.0106573	IGLVI-56	IG_V_pseudogene
ENSG00000287536.1	0.895565	-1.42598	0.344069	-4.14446	3.40608e-05	0.00015209	AC012500.1	lncRNA
ENSG00000241226.3	0.679026	-1.42597	0.334971	-4.257	2.07184e-05	9.75926e-05	RN7SL836P	misc_RNA
ENSG00000251303.1	1.01591	-1.42587	0.294916	-4.83484	1.33251e-06	8.42589e-06	CAB39P1	processed_pseudogene
ENSG00000125363.14	1.63057	-1.42562	0.271347	-5.25387	1.48938e-07	1.18519e-06	AMELX	protein_coding
ENSG00000279498.1	0.572019	-1.42523	0.402462	-3.54128	0.000398184	0.00135187	AL356121.2	TEC
ENSG00000270986.1	2.98989	-1.42442	0.221681	-6.42552	1.31422e-10	2.06906e-09	HMGB1P51	processed_pseudogene
ENSG00000236636.2	0.855168	-1.4243	0.32402	-4.39571	1.10409e-05	5.57656e-05	AL627308.2	processed_pseudogene
ENSG00000225673.3	0.984305	-1.42405	0.302027	-4.71498	2.41738e-06	1.43371e-05	AC104164.1	processed_pseudogene
ENSG00000243968.2	0.501639	-1.42326	0.416142	-3.42013	0.000625922	0.00201664	RN7SL402P	misc_RNA
ENSG00000241420.3	1.07447	-1.42313	0.284629	-4.99994	5.73496e-07	3.97042e-06	RN7SL505P	misc_RNA
ENSG00000271100.1	0.700199	-1.4219	0.347363	-4.09341	4.25079e-05	0.000185039	AP000753.3	processed_pseudogene
ENSG00000243365.3	0.899565	-1.421	0.371772	-3.82224	0.000132247	0.000506503	RN7SL278P	misc_RNA
ENSG00000201071.1	0.75303	-1.42088	0.288196	-4.93026	8.21198e-07	5.47011e-06	Y_RNA	misc_RNA
ENSG00000217227.1	0.903979	-1.41967	0.295381	-4.80625	1.53791e-06	9.58458e-06	AL079341.1	processed_pseudogene
ENSG00000057593.14	18.2627	-1.41909	0.182718	-7.76653	8.06664e-15	2.9034e-13	F7	protein_coding
ENSG00000287017.1	0.868256	-1.41872	0.233463	-6.07684	1.22576e-09	1.56195e-08	AL591022.1	lncRNA
ENSG00000249649.1	1.19388	-1.41751	0.285092	-4.97212	6.62253e-07	4.51331e-06	MRPS33P2	processed_pseudogene
ENSG00000139209.16	241.167	-1.41719	0.189676	-7.47162	7.92131e-14	2.37976e-12	SLC38A4	protein_coding
ENSG00000201470.1	0.917415	-1.41689	0.349187	-4.05768	4.95624e-05	0.000211968	RNY4P7	misc_RNA
ENSG00000237300.2	0.908017	-1.41581	0.294243	-4.8117	1.4965e-06	9.35269e-06	MTCO1P19	processed_pseudogene
ENSG00000176204.13	41.1644	-1.41537	0.200547	-7.05753	1.6949e-12	3.90388e-11	LRRTM4	protein_coding
ENSG00000224500.1	0.608022	-1.41534	0.380026	-3.72431	0.00019585	0.000717995	AL731575.1	lncRNA
ENSG00000257325.1	0.660316	-1.41491	0.306543	-4.61571	3.91762e-06	2.20427e-05	AC138360.1	lncRNA
ENSG00000259296.1	1.22621	-1.4142	0.315145	-4.48745	7.20801e-06	3.80826e-05	AC020892.2	lncRNA
ENSG00000235196.3	0.634268	-1.41414	0.297388	-4.75521	1.98243e-06	1.20332e-05	Z68868.1	processed_pseudogene
ENSG00000235050.6	1.93044	-1.41388	0.2306	-6.1313	8.71657e-10	1.15297e-08	MLIP-AS1	lncRNA
ENSG00000231134.1	1.61612	-1.41384	0.274756	-5.14579	2.66393e-07	2.00118e-06	TCF7L1-IT1	lncRNA
ENSG00000131482.10	548.291	-1.41361	0.197701	-7.15026	8.66123e-13	2.10264e-11	G6PC	protein_coding
ENSG00000255660.1	16.6321	-1.41329	0.152183	-9.28681	1.58978e-20	1.59778e-18	RERG-AS1	lncRNA
ENSG00000265684.2	0.550402	-1.41293	0.344477	-4.10168	4.10158e-05	0.000179456	RN7SL378P	misc_RNA
ENSG00000207590.1	0.97005	-1.4126	0.282259	-5.00463	5.59681e-07	3.88262e-06	MIR215	miRNA
ENSG00000241537.1	2.33761	-1.41256	0.220245	-6.41358	1.4214e-10	2.22287e-09	AC134050.1	processed_pseudogene
ENSG00000277483.1	0.414204	-1.41228	0.609121	-2.31856	0.020419	0.0423809	RN7SL321P	misc_RNA
ENSG00000198650.11	12.8007	-1.41217	0.172344	-8.1939	2.52888e-16	1.20938e-14	TAT	protein_coding
ENSG00000252329.1	0.715036	-1.4116	0.315573	-4.47314	7.70803e-06	4.04556e-05	AC013549.2	scaRNA
ENSG00000257017.9	2103.96	-1.41154	0.277695	-5.08305	3.71416e-07	2.69632e-06	HP	protein_coding
ENSG00000227433.1	0.785644	-1.41114	0.319662	-4.41447	1.01259e-05	5.16304e-05	AC090018.1	processed_pseudogene
ENSG00000225832.1	0.823723	-1.41092	0.327756	-4.30479	1.67147e-05	8.0627e-05	AL035090.1	processed_pseudogene
ENSG00000235914.2	1.10118	-1.41091	0.294063	-4.79797	1.60281e-06	9.93898e-06	MACROD2-AS1	lncRNA
ENSG00000276410.4	1.0083	-1.41003	0.279366	-5.04724	4.48231e-07	3.18948e-06	H2BC3	protein_coding
ENSG00000225928.2	3.05451	-1.41001	0.237834	-5.92855	3.05614e-09	3.57699e-08	CACYBPP1	processed_pseudogene
ENSG00000283828.1	26.43	-1.40964	0.133087	-10.5919	3.25061e-26	8.03312e-24	AL137002.2	lncRNA
ENSG00000244521.3	0.313988	-1.40961	1.67882	-0.83964	0.40111	0.505681	RN7SL700P	misc_RNA
ENSG00000233189.1	1.24373	-1.40935	0.242177	-5.8195	5.90247e-09	6.46923e-08	RPL12P29	processed_pseudogene
ENSG00000280284.1	0.426548	-1.40895	0.561454	-2.50948	0.0120911	0.0269894	AC092608.3	TEC
ENSG00000183535.9	33.5867	-1.40872	0.139248	-10.1166	4.66299e-24	8.43944e-22	COL18A1-AS1	lncRNA
ENSG00000222594.1	1.06307	-1.40857	0.346465	-4.06554	4.79204e-05	0.000205764	RN7SKP235	misc_RNA
ENSG00000199683.1	1.9895	-1.40834	0.26302	-5.35449	8.57986e-08	7.21574e-07	RN7SKP185	misc_RNA
ENSG00000186439.14	6.23968	-1.40798	0.213207	-6.60382	4.00699e-11	6.98638e-10	TRDN	protein_coding
ENSG00000234105.1	1.17096	-1.40746	0.299277	-4.70288	2.56514e-06	1.51108e-05	AC009468.2	lncRNA
ENSG00000264678.1	0.452365	-1.40715	0.613786	-2.29258	0.0218722	0.0449156	MIR3140	miRNA
ENSG00000225437.6	0.788729	-1.40704	0.421501	-3.33818	0.000843297	0.00262248	PACRG-AS2	lncRNA
ENSG00000131730.16	711.319	-1.40665	0.1967	-7.15122	8.60096e-13	2.08915e-11	CKMT2	protein_coding
ENSG00000279340.1	0.891424	-1.4062	0.278516	-5.0489	4.44361e-07	3.16346e-06	AC090617.7	TEC
ENSG00000250345.2	1.9616	-1.40549	0.248407	-5.65801	1.53138e-08	1.51212e-07	AC104090.1	processed_pseudogene
ENSG00000240888.1	0.897859	-1.40536	0.331407	-4.24058	2.22945e-05	0.000104212	AC131210.1	lncRNA
ENSG00000267240.1	0.819748	-1.40511	0.346405	-4.05625	4.98665e-05	0.000213051	AC011524.2	lncRNA
ENSG00000270893.1	0.609569	-1.4043	0.316388	-4.43854	9.05697e-06	4.66879e-05	AC008277.2	processed_pseudogene
ENSG00000283647.1	1.03976	-1.40419	0.283109	-4.95989	7.05315e-07	4.77245e-06	AL512643.1	lncRNA
ENSG00000125355.16	645.282	-1.40276	0.167141	-8.39265	4.7532e-17	2.61267e-15	TMEM255A	protein_coding
ENSG00000232031.1	0.623196	-1.40257	0.335962	-4.17478	2.98275e-05	0.000135125	AL078599.2	lncRNA
ENSG00000049283.18	62.5696	-1.40224	0.194355	-7.21484	5.39975e-13	1.36832e-11	EPN3	protein_coding
ENSG00000230684.1	1.05276	-1.40188	0.255754	-5.48138	4.22019e-08	3.81436e-07	AL158207.2	lncRNA
ENSG00000278705.1	4.42018	-1.40145	0.210098	-6.67046	2.55009e-11	4.67041e-10	H4C2	protein_coding
ENSG00000168004.10	82.8929	-1.40129	0.159428	-8.78944	1.50306e-18	1.06562e-16	PLAAT5	protein_coding
ENSG00000269138.1	5.89721	-1.40117	0.335216	-4.17989	2.91644e-05	0.000132363	ZNF209P	unprocessed_pseudogene
ENSG00000286722.1	59.4129	-1.40094	0.207064	-6.76573	1.32639e-11	2.54987e-10	AC009244.1	lncRNA
ENSG00000264914.1	1.36604	-1.4006	0.262115	-5.34348	9.11784e-08	7.62068e-07	AC015845.1	lncRNA
ENSG00000244232.3	1.16619	-1.39969	0.259756	-5.38847	7.106e-08	6.08073e-07	RN7SL698P	misc_RNA
ENSG00000095203.14	117.323	-1.39964	0.176338	-7.93725	2.06715e-15	8.42819e-14	EPB41L4B	protein_coding
ENSG00000248200.2	1.2945	-1.39823	0.285821	-4.89198	9.98289e-07	6.50568e-06	AC093770.1	processed_pseudogene
ENSG00000248192.1	0.437576	-1.39798	0.499759	-2.79731	0.00515305	0.0128395	ATG10-AS1	lncRNA
ENSG00000254897.1	0.516726	-1.39723	0.382162	-3.65613	0.00025605	0.000911278	AP003035.1	processed_pseudogene
ENSG00000197549.9	2.98585	-1.39701	0.283551	-4.92686	8.35609e-07	5.55695e-06	PRAMENP	transcribed_unprocessed_pseudogene
ENSG00000240097.1	0.677127	-1.39696	0.394192	-3.54386	0.000394316	0.00133965	AC104164.2	processed_pseudogene
ENSG00000228231.2	1.0042	-1.39691	0.220142	-6.34548	2.2173e-10	3.33629e-09	TINAG-AS1	lncRNA
ENSG00000240997.3	0.694191	-1.39685	0.44237	-3.15766	0.00159038	0.00458249	RN7SL183P	misc_RNA
ENSG00000240474.3	1.62809	-1.39651	0.311982	-4.47624	7.59687e-06	3.99051e-05	RN7SL116P	misc_RNA
ENSG00000227532.1	0.512408	-1.39505	0.324173	-4.30341	1.68185e-05	8.10491e-05	AC002542.1	processed_pseudogene
ENSG00000257083.7	1.68552	-1.39484	0.249926	-5.581	2.39142e-08	2.27506e-07	AC073530.1	lncRNA
ENSG00000271642.1	0.965563	-1.39348	0.241361	-5.77341	7.76851e-09	8.26272e-08	MARK3P1	processed_pseudogene
ENSG00000280166.1	1.07607	-1.39345	0.298864	-4.6625	3.12387e-06	1.79742e-05	AC016542.3	TEC
ENSG00000241461.3	1.0912	-1.39314	0.326404	-4.26815	1.97099e-05	9.33358e-05	RN7SL182P	misc_RNA
ENSG00000242101.3	0.756945	-1.39289	0.491369	-2.83472	0.00458663	0.0116029	RN7SL416P	misc_RNA
ENSG00000221063.3	0.533981	-1.39286	0.396945	-3.50894	0.000449895	0.00150561	MIR1296	miRNA
ENSG00000223156.1	0.72894	-1.39079	0.289808	-4.79903	1.59439e-06	9.88813e-06	RNU2-18P	snRNA
ENSG00000267269.1	0.371102	-1.39007	0.893352	-1.55602	0.119704	0.189606	AC010776.1	lncRNA
ENSG00000228108.1	1.08764	-1.39004	0.235742	-5.89642	3.71478e-09	4.27041e-08	SPTBN1-AS1	lncRNA
ENSG00000279616.1	2.91387	-1.38954	0.182576	-7.61075	2.72509e-14	8.92125e-13	AL096817.1	TEC
ENSG00000249605.1	0.467381	-1.38867	0.382457	-3.63093	0.000282401	0.000993938	AC008652.1	lncRNA
ENSG00000287290.1	6.42454	-1.38859	0.221728	-6.26258	3.78659e-10	5.43315e-09	AC093765.3	lncRNA
ENSG00000134812.8	2.6964	-1.38806	0.210264	-6.60152	4.06961e-11	7.08056e-10	CBLIF	protein_coding
ENSG00000217483.1	0.35293	-1.38641	0.839795	-1.6509	0.0987596	0.161568	FO393414.2	processed_pseudogene
ENSG00000214188.9	4.16535	-1.38617	0.180838	-7.66525	1.78482e-14	6.06606e-13	ST7-OT4	lncRNA
ENSG00000253168.1	0.598869	-1.3859	0.334116	-4.14797	3.35441e-05	0.000149994	AC124069.1	lncRNA
ENSG00000251906.2	0.480708	-1.38574	0.326252	-4.24747	2.16198e-05	0.000101356	RNU6-351P	snRNA
ENSG00000250243.3	1.74159	-1.38508	0.228082	-6.0727	1.25774e-09	1.59539e-08	AC110296.1	lncRNA
ENSG00000212181.1	0.444513	-1.38507	0.465719	-2.97404	0.00293905	0.00786153	AC019070.1	snoRNA
ENSG00000279995.1	0.488918	-1.38473	0.513904	-2.69453	0.00704885	0.0168593	AC139792.3	TEC
ENSG00000250698.1	1.29829	-1.38427	0.248042	-5.58078	2.39438e-08	2.27642e-07	AC131182.1	lncRNA
ENSG00000199248.1	0.676054	-1.38356	0.346327	-3.99494	6.47114e-05	0.000268188	RNU6-28P	snRNA
ENSG00000235880.1	1.29707	-1.38332	0.266098	-5.19852	2.00879e-07	1.55246e-06	AL158832.1	lncRNA
ENSG00000257784.2	0.769541	-1.38289	0.312928	-4.41922	9.90601e-06	5.06192e-05	LINC02400	lncRNA
ENSG00000244112.3	0.473885	-1.38215	0.445067	-3.10548	0.00189969	0.00535893	RN7SL508P	misc_RNA
ENSG00000255545.8	366.631	-1.38197	0.207561	-6.65815	2.77301e-11	5.04546e-10	B3GAT1-DT	lncRNA
ENSG00000255157.1	0.71232	-1.38179	0.271856	-5.08279	3.71924e-07	2.69913e-06	DEFB130C	transcribed_unprocessed_pseudogene
ENSG00000199781.1	0.885899	-1.38039	0.333311	-4.14145	3.45122e-05	0.000153689	Y_RNA	misc_RNA
ENSG00000232035.1	1.00566	-1.38033	0.292906	-4.71254	2.44645e-06	1.44922e-05	AL135790.1	lncRNA
ENSG00000287524.1	0.737275	-1.37973	0.34346	-4.01717	5.89022e-05	0.000246776	AC007736.1	lncRNA
ENSG00000270555.1	0.878378	-1.3786	0.378118	-3.64595	0.000266404	0.000943228	AC211469.1	processed_pseudogene
ENSG00000279665.1	1.12801	-1.37805	0.277023	-4.97448	6.5422e-07	4.4702e-06	AC012100.3	TEC
ENSG00000287417.1	1.97142	-1.37797	0.223798	-6.1572	7.40429e-10	9.96256e-09	AC006059.4	lncRNA
ENSG00000274666.1	0.703476	-1.37761	0.402317	-3.42418	0.00061665	0.00198979	AL133370.2	unprocessed_pseudogene
ENSG00000243420.3	0.365612	-1.37751	1.00539	-1.37013	0.170647	0.253858	RN7SL734P	misc_RNA
ENSG00000236073.2	0.644154	-1.3774	0.3312	-4.15881	3.19914e-05	0.000143816	AL627311.1	processed_pseudogene
ENSG00000143001.5	17.4409	-1.3768	0.275737	-4.99316	5.94001e-07	4.09646e-06	TMEM61	protein_coding
ENSG00000286363.1	0.780314	-1.37663	0.30807	-4.46855	7.8753e-06	4.12072e-05	AC087427.1	lncRNA
ENSG00000248521.1	0.878041	-1.37661	0.291427	-4.72369	2.31599e-06	1.38075e-05	AC092612.1	processed_pseudogene
ENSG00000242928.3	0.69746	-1.3763	0.283753	-4.85033	1.23253e-06	7.85178e-06	RN7SL868P	misc_RNA
ENSG00000277591.1	0.390425	-1.37557	0.457271	-3.00821	0.00262789	0.0071212	RN7SL575P	misc_RNA
ENSG00000256314.1	0.753692	-1.37508	0.32342	-4.25169	2.12162e-05	9.97371e-05	AC078962.3	lncRNA
ENSG00000250214.1	0.838917	-1.37489	0.366832	-3.74799	0.000178255	0.000660215	AC112225.1	processed_pseudogene
ENSG00000274150.1	0.52804	-1.3745	0.406966	-3.37743	0.000731677	0.00231482	FADS2B	unprocessed_pseudogene
ENSG00000255130.1	0.583163	-1.37414	0.330223	-4.16126	3.16495e-05	0.000142408	AC022874.1	lncRNA
ENSG00000250149.2	1.78666	-1.37334	0.230391	-5.9609	2.50851e-09	2.99095e-08	AC104664.1	lncRNA
ENSG00000237027.1	0.751402	-1.3732	0.267634	-5.13088	2.88396e-07	2.14935e-06	AL159174.1	lncRNA
ENSG00000256571.1	1.1846	-1.37283	0.235055	-5.84045	5.20603e-09	5.77161e-08	AC079866.2	lncRNA
ENSG00000275379.2	0.982541	-1.37269	0.366835	-3.74197	0.000182583	0.000674393	H3C11	protein_coding
ENSG00000287579.1	0.554494	-1.3724	0.50759	-2.70377	0.00685587	0.016457	AC139491.8	lncRNA
ENSG00000254649.1	0.896358	-1.37159	0.331451	-4.13815	3.50117e-05	0.000155711	AP003086.2	lncRNA
ENSG00000207997.1	0.754062	-1.37155	0.312133	-4.39412	1.11222e-05	5.61127e-05	MIR644A	miRNA
ENSG00000200494.1	0.596041	-1.37132	0.468123	-2.9294	0.00339616	0.00891887	Y_RNA	misc_RNA
ENSG00000252578.1	0.670639	-1.37071	0.315913	-4.33887	1.43216e-05	7.02635e-05	RNU6-135P	snRNA
ENSG00000179008.9	1.72682	-1.37006	0.24291	-5.64017	1.69878e-08	1.66145e-07	C14orf39	protein_coding
ENSG00000170011.14	467.861	-1.36925	0.141279	-9.69185	3.26553e-22	4.44622e-20	MYRIP	protein_coding
ENSG00000244671.3	1.54682	-1.36846	0.2375	-5.76191	8.31684e-09	8.7622e-08	RN7SL280P	misc_RNA
ENSG00000231138.1	0.657372	-1.36813	0.345468	-3.96023	7.48792e-05	0.000305885	AC009987.1	lncRNA
ENSG00000036473.8	3.7709	-1.36801	0.228249	-5.99352	2.05352e-09	2.50627e-08	OTC	protein_coding
ENSG00000266100.1	0.888646	-1.36795	0.293245	-4.66485	3.08841e-06	1.77931e-05	AC007431.2	lncRNA
ENSG00000278250.1	2.86856	-1.36764	0.206126	-6.63496	3.24601e-11	5.80644e-10	Metazoa_SRP	misc_RNA
ENSG00000244194.3	0.318316	-1.36759	0.880981	-1.55235	0.120579	0.190712	RN7SL218P	misc_RNA
ENSG00000229009.7	0.990452	-1.36699	0.281511	-4.85592	1.19831e-06	7.65128e-06	TMPRSS11GP	transcribed_unprocessed_pseudogene
ENSG00000267504.1	9.76468	-1.36681	0.157495	-8.67847	4.01119e-18	2.6302e-16	AC090236.2	lncRNA
ENSG00000213005.3	0.808535	-1.36654	0.303281	-4.50584	6.61117e-06	3.52261e-05	PTTG3P	processed_pseudogene
ENSG00000279502.1	1.38461	-1.36628	0.275887	-4.95231	7.33394e-07	4.94291e-06	AC016542.2	TEC
ENSG00000201801.1	0.731957	-1.36502	0.302608	-4.51087	6.45622e-06	3.45037e-05	RNU5E-4P	snRNA
ENSG00000233517.1	4.22317	-1.36373	0.188909	-7.21898	5.23806e-13	1.33224e-11	AC005162.1	lncRNA
ENSG00000207233.1	1.15562	-1.36344	0.257713	-5.29053	1.2196e-07	9.91605e-07	SNORA37	snoRNA
ENSG00000202514.1	0.76047	-1.36278	0.29459	-4.626	3.7279e-06	2.10498e-05	Y_RNA	misc_RNA
ENSG00000167653.5	19.7924	-1.36277	0.201247	-6.77161	1.27356e-11	2.45893e-10	PSCA	protein_coding
ENSG00000232875.1	1.12894	-1.36262	0.275777	-4.94103	7.77094e-07	5.20592e-06	HMGN2P35	processed_pseudogene
ENSG00000259899.1	9.03348	-1.36154	0.152409	-8.93346	4.12875e-19	3.24205e-17	AC010333.2	lncRNA
ENSG00000237170.3	3.13144	-1.3615	0.192308	-7.07982	1.44337e-12	3.36632e-11	RPS7P15	processed_pseudogene
ENSG00000208025.1	0.419577	-1.36124	0.583448	-2.33309	0.0196432	0.0410205	MIR591	miRNA
ENSG00000274173.1	54.5353	-1.36112	0.226743	-6.00289	1.93838e-09	2.37356e-08	AL035661.1	lncRNA
ENSG00000253008.2	1.09441	-1.36102	0.261986	-5.195	2.04724e-07	1.57998e-06	MIR2355	miRNA
ENSG00000243687.1	0.860743	-1.3609	0.32635	-4.17005	3.04534e-05	0.000137555	RPL35AP10	processed_pseudogene
ENSG00000206995.1	0.747483	-1.36055	0.317784	-4.28137	1.85746e-05	8.85342e-05	Y_RNA	misc_RNA
ENSG00000227218.7	58.9681	-1.35981	0.154176	-8.81985	1.14611e-18	8.29729e-17	AL157935.1	lncRNA
ENSG00000248696.1	0.955798	-1.35973	0.297503	-4.57048	4.86614e-06	2.6857e-05	AC011406.1	processed_pseudogene
ENSG00000260284.1	5.12974	-1.35964	0.323626	-4.20128	2.65415e-05	0.000121725	TPSP2	unprocessed_pseudogene
ENSG00000270874.1	1.88438	-1.35937	0.26122	-5.20392	1.95125e-07	1.51325e-06	RPAP2P1	processed_pseudogene
ENSG00000232857.2	0.557003	-1.35916	0.410012	-3.31492	0.000916698	0.00282275	KATNBL1P2	processed_pseudogene
ENSG00000275877.1	0.298407	-1.35866	0.88234	-1.53984	0.123599	0.194672	5_8S_rRNA	rRNA
ENSG00000287714.1	0.701191	-1.35842	0.358015	-3.7943	0.000148059	0.000559738	AC025164.2	lncRNA
ENSG00000231944.1	1.50657	-1.35782	0.222012	-6.11599	9.59608e-10	1.25402e-08	PHKA1-AS1	lncRNA
ENSG00000207032.1	1.686	-1.35765	0.205662	-6.60136	4.07403e-11	7.08548e-10	Y_RNA	misc_RNA
ENSG00000267027.1	0.707162	-1.35746	0.308639	-4.39822	1.09143e-05	5.51698e-05	AC011524.1	lncRNA
ENSG00000160868.15	31.3362	-1.35666	0.125634	-10.7984	3.50107e-27	9.68186e-25	CYP3A4	protein_coding
ENSG00000235018.1	1.61054	-1.35659	0.216769	-6.25822	3.89403e-10	5.56578e-09	AL137077.1	processed_pseudogene
ENSG00000240733.3	2.07133	-1.35547	0.221091	-6.13082	8.74298e-10	1.15543e-08	RN7SL502P	misc_RNA
ENSG00000244610.3	1.21678	-1.35546	0.277806	-4.87915	1.06545e-06	6.88793e-06	RN7SL756P	misc_RNA
ENSG00000229642.1	1.01048	-1.35535	0.437356	-3.09896	0.00194204	0.00546799	AC087857.1	lncRNA
ENSG00000227309.1	1.34928	-1.35533	0.238684	-5.67837	1.35985e-08	1.35963e-07	AC140076.1	processed_pseudogene
ENSG00000222069.1	0.903628	-1.35508	0.254177	-5.33124	9.75428e-08	8.11042e-07	RN7SKP285	misc_RNA
ENSG00000278900.1	0.684437	-1.35488	0.288958	-4.68885	2.74748e-06	1.60554e-05	AC139792.2	TEC
ENSG00000228548.1	1.29842	-1.3544	0.261462	-5.18011	2.21756e-07	1.69672e-06	ITPKB-AS1	lncRNA
ENSG00000277011.1	29.7759	-1.3538	0.252243	-5.36706	8.00304e-08	6.77671e-07	AC148477.4	lncRNA
ENSG00000149452.16	214.608	-1.35378	0.230635	-5.86979	4.3636e-09	4.93098e-08	SLC22A8	protein_coding
ENSG00000274472.1	0.627221	-1.35345	0.318926	-4.24377	2.19799e-05	0.000102902	Y_RNA	misc_RNA
ENSG00000267750.6	22.8806	-1.35344	0.176688	-7.66006	1.85845e-14	6.28673e-13	RUNDC3A-AS1	lncRNA
ENSG00000211867.1	0.654784	-1.35338	0.346993	-3.90032	9.60665e-05	0.000381651	TRAJ22	TR_J_gene
ENSG00000248790.1	0.531068	-1.35217	0.397699	-3.39998	0.000673918	0.00214996	AC097103.1	lncRNA
ENSG00000137878.17	41.3406	-1.35211	0.139525	-9.69082	3.29865e-22	4.47762e-20	GCOM1	protein_coding
ENSG00000264618.2	1.67013	-1.35192	0.216311	-6.24991	4.10676e-10	5.83425e-09	RN7SL732P	misc_RNA
ENSG00000276393.1	0.950441	-1.35181	0.296398	-4.56078	5.09628e-06	2.79642e-05	AC105429.2	unprocessed_pseudogene
ENSG00000232768.1	1.08185	-1.35161	0.279259	-4.83999	1.29847e-06	8.22829e-06	AL356320.1	processed_pseudogene
ENSG00000237551.1	1.21188	-1.35142	0.254736	-5.30517	1.12569e-07	9.21818e-07	AC096775.1	processed_pseudogene
ENSG00000256134.1	3.62077	-1.35064	0.184666	-7.31397	2.59354e-13	7.04958e-12	EGLN3P1	processed_pseudogene
ENSG00000138696.11	217.028	-1.3505	0.205427	-6.57414	4.89339e-11	8.39247e-10	BMPR1B	protein_coding
ENSG00000230205.1	0.751712	-1.34972	0.342166	-3.94462	7.9925e-05	0.000324119	AL359382.1	lncRNA
ENSG00000285557.1	0.909641	-1.34961	0.37488	-3.60012	0.000318074	0.00110638	AC069410.1	lncRNA
ENSG00000241913.1	0.935632	-1.3492	0.301281	-4.4782	7.52749e-06	3.9578e-05	RPS29P21	processed_pseudogene
ENSG00000200075.1	0.833219	-1.34897	0.321835	-4.19149	2.77129e-05	0.00012651	AC022973.1	snoRNA
ENSG00000263794.2	0.336713	-1.34839	0.679591	-1.98411	0.0472433	0.0870402	RN7SL457P	misc_RNA
ENSG00000240993.3	1.34155	-1.34825	0.267788	-5.03475	4.7848e-07	3.37667e-06	RN7SL459P	misc_RNA
ENSG00000242197.2	1.02944	-1.34783	0.284044	-4.74516	2.08344e-06	1.25697e-05	AC098869.1	processed_pseudogene
ENSG00000283644.1	0.988847	-1.34631	0.23157	-5.81385	6.10535e-09	6.67063e-08	ETDC	protein_coding
ENSG00000146411.6	72.6823	-1.34627	0.138798	-9.69946	3.03094e-22	4.1522e-20	SLC2A12	protein_coding
ENSG00000279336.1	0.929225	-1.34591	0.267651	-5.02861	4.94046e-07	3.47714e-06	AL353662.2	pseudogene
ENSG00000240233.3	5.19877	-1.34558	0.200078	-6.7253	1.75229e-11	3.28908e-10	RN7SL587P	misc_RNA
ENSG00000253973.3	3.57964	-1.34539	0.195328	-6.88782	5.66519e-12	1.17371e-10	AC079296.1	lncRNA
ENSG00000260621.1	1.17266	-1.34487	0.330591	-4.06809	4.74003e-05	0.000203845	AC092140.1	lncRNA
ENSG00000198739.11	2.84648	-1.34459	0.209808	-6.40869	1.46773e-10	2.28809e-09	LRRTM3	protein_coding
ENSG00000255396.2	0.343517	-1.34437	0.751117	-1.78982	0.0734822	0.126333	AP000857.1	processed_pseudogene
ENSG00000237336.1	1.02764	-1.34272	0.293638	-4.5727	4.81485e-06	2.66036e-05	AL445489.1	lncRNA
ENSG00000227528.6	0.803372	-1.34257	0.38741	-3.46549	0.00052926	0.00173885	DIAPH3-AS1	lncRNA
ENSG00000248332.6	3.31486	-1.3422	0.214403	-6.26017	3.84566e-10	5.50903e-09	TUB-AS1	lncRNA
ENSG00000261410.1	1.17139	-1.34076	0.263989	-5.07884	3.79753e-07	2.75191e-06	AC009142.1	lncRNA
ENSG00000223810.2	0.510548	-1.34031	0.452242	-2.9637	0.00303966	0.00809855	KRT8P28	processed_pseudogene
ENSG00000282943.1	1.31233	-1.34029	0.420874	-3.18454	0.00144986	0.00422489	AC004784.1	lncRNA
ENSG00000252237.1	0.33995	-1.34	0.846224	-1.5835	0.113307	0.181232	RNU4-54P	snRNA
ENSG00000101850.13	518.229	-1.33988	0.172715	-7.75778	8.64279e-15	3.09327e-13	GPR143	protein_coding
ENSG00000232342.7	2.39741	-1.33956	0.182231	-7.35089	1.96895e-13	5.46872e-12	AC022540.1	lncRNA
ENSG00000258437.1	0.701408	-1.33926	0.307832	-4.3506	1.35763e-05	6.70054e-05	AL139193.1	lncRNA
ENSG00000241745.3	0.538045	-1.33775	0.438647	-3.04973	0.00229051	0.00631887	RN7SL788P	misc_RNA
ENSG00000282952.1	0.555354	-1.33771	0.394791	-3.38838	0.000703057	0.00223316	AL583852.1	lncRNA
ENSG00000285581.1	3.49111	-1.33737	0.201294	-6.64386	3.05567e-11	5.49686e-10	AC091196.1	lncRNA
ENSG00000258966.1	0.503744	-1.33724	0.471852	-2.83403	0.00459657	0.0116254	GTF3AP2	transcribed_processed_pseudogene
ENSG00000252452.1	1.16282	-1.33619	0.259989	-5.13941	2.75602e-07	2.06125e-06	RNU6-107P	snRNA
ENSG00000263688.1	1.04378	-1.33594	0.329678	-4.05224	5.07287e-05	0.000216237	AC025887.1	lncRNA
ENSG00000275377.1	0.560508	-1.33558	0.371387	-3.59619	0.000322911	0.00112162	MIR1299	miRNA
ENSG00000279366.1	1.1449	-1.33478	0.348362	-3.83159	0.000127315	0.000490436	AC120349.2	TEC
ENSG00000250448.1	1.00667	-1.33414	0.356074	-3.7468	0.000179105	0.000663088	AC092335.1	lncRNA
ENSG00000207524.1	1.03204	-1.33356	0.233297	-5.71615	1.08967e-08	1.11581e-07	RNU6-33P	snRNA
ENSG00000240873.1	0.755635	-1.33334	0.272537	-4.89233	9.96501e-07	6.49498e-06	RPS29P22	processed_pseudogene
ENSG00000248155.1	0.805378	-1.33325	0.336444	-3.96279	7.40803e-05	0.000302789	CR545473.1	unprocessed_pseudogene
ENSG00000185031.6	11.9138	-1.33267	0.141771	-9.40015	5.44859e-21	5.88805e-19	SLC2A3P2	processed_pseudogene
ENSG00000263841.2	0.623119	-1.33228	0.42876	-3.1073	0.00188806	0.00533084	RN7SL44P	misc_RNA
ENSG00000231859.1	1.1725	-1.3317	0.239268	-5.5657	2.611e-08	2.46709e-07	AC079781.1	processed_pseudogene
ENSG00000225362.10	7.08866	-1.33128	0.245691	-5.41852	6.00945e-08	5.23598e-07	CT62	lncRNA
ENSG00000240553.1	0.641166	-1.33114	0.3431	-3.87975	0.000104565	0.000411849	AL031428.1	lncRNA
ENSG00000127561.15	76.65	-1.33111	0.166052	-8.01625	1.09019e-15	4.61394e-14	SYNGR3	protein_coding
ENSG00000226759.8	0.682609	-1.33054	0.367851	-3.61706	0.000297965	0.00104295	DAB1-AS1	lncRNA
ENSG00000229696.1	0.863476	-1.33043	0.305328	-4.35738	1.31631e-05	6.52121e-05	KARS1P1	processed_pseudogene
ENSG00000241187.1	1.67326	-1.33023	0.192348	-6.91574	4.65435e-12	9.79791e-11	AC008379.1	processed_pseudogene
ENSG00000250354.1	0.825308	-1.33021	0.268184	-4.96005	7.04751e-07	4.7704e-06	AC069272.1	lncRNA
ENSG00000229711.1	0.515305	-1.32954	0.357321	-3.72085	0.000198555	0.000726278	AL512366.1	lncRNA
ENSG00000277769.1	1.22995	-1.32928	0.315291	-4.21603	2.4864e-05	0.000114777	RBM22P4	processed_pseudogene
ENSG00000132405.19	2268.82	-1.32926	0.105936	-12.5477	4.09041e-36	3.08673e-33	TBC1D14	protein_coding
ENSG00000248624.1	1.34032	-1.32862	0.267094	-4.97436	6.54629e-07	4.47231e-06	AC022447.2	lncRNA
ENSG00000249848.1	2.51878	-1.32788	0.184351	-7.20296	5.89188e-13	1.4829e-11	AC112673.1	processed_pseudogene
ENSG00000277233.1	1.15007	-1.32714	0.255282	-5.19874	2.00646e-07	1.55093e-06	Metazoa_SRP	misc_RNA
ENSG00000285739.1	0.536192	-1.32619	0.4023	-3.29653	0.000978873	0.00299083	AC010157.2	lncRNA
ENSG00000222976.1	0.450597	-1.32614	0.575631	-2.30381	0.0212332	0.0438096	RN7SKP94	misc_RNA
ENSG00000266222.1	0.771788	-1.32602	0.313874	-4.22467	2.39288e-05	0.000110919	AC036222.2	lncRNA
ENSG00000224626.1	1.00685	-1.32581	0.328575	-4.03504	5.45938e-05	0.000230549	AC106053.1	lncRNA
ENSG00000286790.1	0.600813	-1.32561	0.337036	-3.93315	8.38395e-05	0.000338207	AC010494.1	lncRNA
ENSG00000266146.1	1.09239	-1.32509	0.284227	-4.66207	3.13046e-06	1.80098e-05	MIR5190	miRNA
ENSG00000224467.1	0.74708	-1.32466	0.35534	-3.72786	0.000193109	0.000708981	TANK-AS1	lncRNA
ENSG00000251073.1	0.94226	-1.32433	0.274868	-4.81807	1.44954e-06	9.09497e-06	NUDT19P5	processed_pseudogene
ENSG00000113302.5	24.7296	-1.32427	0.16708	-7.92595	2.26417e-15	9.14771e-14	IL12B	protein_coding
ENSG00000260211.2	1.02336	-1.32423	0.422979	-3.13072	0.00174381	0.00496767	AC139426.1	processed_pseudogene
ENSG00000241143.1	0.974343	-1.3242	0.331438	-3.99531	6.46085e-05	0.000267887	RPL32P9	transcribed_processed_pseudogene
ENSG00000214761.3	2.80729	-1.32397	0.181456	-7.29636	2.95667e-13	7.95887e-12	HNRNPA1P15	processed_pseudogene
ENSG00000256762.1	2.49497	-1.32351	0.186684	-7.08961	1.34492e-12	3.15989e-11	STH	protein_coding
ENSG00000196482.18	739.699	-1.32337	0.136423	-9.70051	3.00005e-22	4.12257e-20	ESRRG	protein_coding
ENSG00000216813.1	0.88288	-1.32297	0.305177	-4.33509	1.45703e-05	7.14128e-05	AL358178.1	processed_pseudogene
ENSG00000255115.2	1.11193	-1.3226	0.215445	-6.13891	8.30889e-10	1.10297e-08	AP002812.4	processed_pseudogene
ENSG00000217512.1	1.33594	-1.32234	0.226838	-5.82946	5.56063e-09	6.12205e-08	AL356776.1	processed_pseudogene
ENSG00000200867.1	0.33516	-1.32192	0.898364	-1.47147	0.141164	0.217115	RN7SKP36	misc_RNA
ENSG00000271332.1	1.33664	-1.3216	0.260094	-5.08125	3.74956e-07	2.71892e-06	ATP5MGP8	processed_pseudogene
ENSG00000244294.3	0.69135	-1.3215	0.391657	-3.37413	0.000740506	0.00233943	RN7SL740P	misc_RNA
ENSG00000214814.7	19.4834	-1.32137	0.157557	-8.38663	5.00291e-17	2.73642e-15	FER1L6	protein_coding
ENSG00000231978.2	0.612904	-1.32136	0.422096	-3.13047	0.00174527	0.00497087	AL590103.1	processed_pseudogene
ENSG00000254921.1	0.421749	-1.32131	0.395452	-3.34127	0.000833955	0.00259488	AC116456.1	lncRNA
ENSG00000229241.1	1.36035	-1.32077	0.231842	-5.69686	1.22033e-08	1.23399e-07	PNPT1P1	processed_pseudogene
ENSG00000259482.2	1.35724	-1.3204	0.22989	-5.74364	9.26632e-09	9.6371e-08	RORA-AS2	lncRNA
ENSG00000251224.1	0.829091	-1.32013	0.298334	-4.42499	9.64452e-06	4.94078e-05	CNOT10-AS1	lncRNA
ENSG00000227681.5	2.46093	-1.32	0.213575	-6.18052	6.38924e-10	8.70732e-09	AL033504.1	lncRNA
ENSG00000260744.1	3.06583	-1.3198	0.182566	-7.2292	4.85864e-13	1.25041e-11	AC007494.2	lncRNA
ENSG00000231965.4	0.852369	-1.31855	0.290173	-4.54402	5.51909e-06	3.0051e-05	AF131215.1	processed_pseudogene
ENSG00000287834.1	2.17851	-1.31822	0.211327	-6.23784	4.43655e-10	6.26081e-09	AP005210.2	lncRNA
ENSG00000251129.2	5.11436	-1.31777	0.312085	-4.22248	2.41634e-05	0.000111855	LINC02506	lncRNA
ENSG00000222489.1	7.75074	-1.31674	0.161104	-8.17324	3.00219e-16	1.4085e-14	SNORA79B	snoRNA
ENSG00000249114.1	0.507005	-1.31596	0.385067	-3.41748	0.000632033	0.00203397	AC022447.5	lncRNA
ENSG00000200394.1	2.62702	-1.31565	0.202461	-6.49831	8.12275e-11	1.33401e-09	SNORA38B	snoRNA
ENSG00000228719.1	4.80521	-1.31563	0.208549	-6.30847	2.81807e-10	4.15735e-09	AL022313.2	lncRNA
ENSG00000249293.1	2.49987	-1.31511	0.212828	-6.17919	6.44327e-10	8.77289e-09	AC091868.2	lncRNA
ENSG00000260505.1	0.989588	-1.31506	0.367111	-3.58218	0.000340733	0.00117692	AC096644.3	lncRNA
ENSG00000278873.1	2.03946	-1.31435	0.203018	-6.47406	9.54033e-11	1.54741e-09	PRO1804	TEC
ENSG00000256657.1	0.52335	-1.31412	0.379922	-3.45891	0.000542359	0.00177646	AC244131.1	unprocessed_pseudogene
ENSG00000265327.2	0.897167	-1.3139	0.26423	-4.97257	6.60714e-07	4.50638e-06	RN7SL411P	misc_RNA
ENSG00000234604.2	4.16903	-1.31325	0.160255	-8.19477	2.51073e-16	1.20199e-14	AL021068.1	processed_pseudogene
ENSG00000248221.1	1.1369	-1.31325	0.277346	-4.73507	2.1898e-06	1.31627e-05	STX18-IT1	lncRNA
ENSG00000278771.1	19.2684	-1.31261	0.186563	-7.03573	1.98226e-12	4.51617e-11	RN7SL3	misc_RNA
ENSG00000237031.7	1.20675	-1.31022	0.327523	-4.00039	6.3238e-05	0.00026284	AC008067.1	lncRNA
ENSG00000163623.9	8.1421	-1.31004	0.285218	-4.59313	4.36641e-06	2.43267e-05	NKX6-1	protein_coding
ENSG00000247311.3	2.84016	-1.30866	0.244945	-5.34267	9.15883e-08	7.6535e-07	AC010255.1	lncRNA
ENSG00000272232.2	3.48763	-1.30863	0.1789	-7.31487	2.57627e-13	7.00693e-12	RN7SL726P	misc_RNA
ENSG00000287912.1	0.524765	-1.30842	0.46654	-2.80451	0.00503929	0.0125885	AP003464.1	lncRNA
ENSG00000279437.1	0.330287	-1.30838	0.605426	-2.16109	0.0306881	0.0601059	Z82170.1	TEC
ENSG00000232978.2	2.26493	-1.30836	0.214572	-6.09755	1.07709e-09	1.39324e-08	AL161909.2	lncRNA
ENSG00000261573.1	1.21663	-1.30829	0.300312	-4.35643	1.32199e-05	6.54543e-05	AL157402.2	lncRNA
ENSG00000264932.3	4.40568	-1.30826	0.162407	-8.05547	7.91748e-16	3.43912e-14	AC115989.1	lncRNA
ENSG00000248885.1	3.69141	-1.30818	0.208141	-6.28508	3.27679e-10	4.77084e-09	AC118465.1	processed_pseudogene
ENSG00000253579.1	0.849549	-1.30808	0.333963	-3.91683	8.97209e-05	0.000359166	SUMO2P16	processed_pseudogene
ENSG00000242488.2	1.57463	-1.30786	0.243658	-5.3676	7.97919e-08	6.76037e-07	AF107885.1	transcribed_processed_pseudogene
ENSG00000183036.11	71.939	-1.30671	0.257373	-5.0771	3.83247e-07	2.77317e-06	PCP4	protein_coding
ENSG00000233993.1	0.827946	-1.30658	0.300886	-4.34246	1.40897e-05	6.9248e-05	DTD1-AS1	lncRNA
ENSG00000259876.1	9.15533	-1.30653	0.150838	-8.66182	4.64273e-18	2.98711e-16	AC010333.1	lncRNA
ENSG00000287965.1	7.38131	-1.3065	0.147953	-8.83051	1.04196e-18	7.59265e-17	AC018557.3	lncRNA
ENSG00000196917.6	105.769	-1.30639	0.150379	-8.68733	3.71055e-18	2.44386e-16	HCAR1	protein_coding
ENSG00000233211.2	0.279712	-1.30632	1.00896	-1.29473	0.195415		GRPEL2P1	processed_pseudogene
ENSG00000250980.1	2.55436	-1.30621	0.203798	-6.40933	1.46161e-10	2.27934e-09	NSA2P6	processed_pseudogene
ENSG00000248758.1	1.34275	-1.30599	0.254925	-5.12304	3.00641e-07	2.23091e-06	AC008883.1	lncRNA
ENSG00000266149.1	3.00653	-1.30585	0.175137	-7.4562	8.90558e-14	2.65753e-12	AP001094.3	lncRNA
ENSG00000233215.6	6.70744	-1.30528	0.287637	-4.53795	5.68049e-06	3.08261e-05	LINC01687	lncRNA
ENSG00000237224.4	1.14669	-1.30508	0.267057	-4.8869	1.02435e-06	6.6541e-06	AL157832.2	lncRNA
ENSG00000249231.8	8.63182	-1.30506	0.185373	-7.04019	1.91977e-12	4.38104e-11	CASC16	lncRNA
ENSG00000249219.1	0.788888	-1.30485	0.27518	-4.74179	2.11838e-06	1.27645e-05	AC108199.1	lncRNA
ENSG00000282625.1	0.400816	-1.30466	0.522146	-2.49865	0.0124666	0.0277318	MRPL57P8	processed_pseudogene
ENSG00000261315.2	1.40943	-1.30315	0.228324	-5.70747	1.14669e-08	1.16855e-07	LARP4P	transcribed_processed_pseudogene
ENSG00000271204.1	4.38894	-1.30224	0.201511	-6.46238	1.03069e-10	1.65605e-09	AC016831.4	lncRNA
ENSG00000257957.1	1.54161	-1.30209	0.229446	-5.67493	1.38749e-08	1.38447e-07	QRSL1P3	processed_pseudogene
ENSG00000212445.1	0.449797	-1.3014	0.357117	-3.64418	0.000268244	0.000948913	AC130462.1	snoRNA
ENSG00000244264.3	0.864086	-1.30136	0.247121	-5.26611	1.39345e-07	1.11885e-06	RN7SL597P	misc_RNA
ENSG00000213050.5	1.48589	-1.30129	0.214018	-6.08026	1.1999e-09	1.53471e-08	TPM3P1	processed_pseudogene
ENSG00000252763.1	0.517944	-1.30128	0.400114	-3.25228	0.00114483	0.0034324	RNU2-31P	snRNA
ENSG00000286784.1	0.517397	-1.301	0.409579	-3.17643	0.00149101	0.00432979	AC116611.1	lncRNA
ENSG00000244226.1	1.49248	-1.30025	0.246285	-5.27946	1.29567e-07	1.04752e-06	ILF2P1	processed_pseudogene
ENSG00000206129.4	11.4773	-1.30017	0.227834	-5.70665	1.15222e-08	1.17312e-07	AC006305.1	lncRNA
ENSG00000186009.5	4.077	-1.29956	0.170576	-7.61866	2.56328e-14	8.41628e-13	ATP4B	protein_coding
ENSG00000226163.1	0.737897	-1.29931	0.303036	-4.28764	1.80584e-05	8.63976e-05	AL513185.1	lncRNA
ENSG00000286568.1	0.716839	-1.299	0.349972	-3.71171	0.00020586	0.000750103	AC007879.5	lncRNA
ENSG00000260511.1	1.16752	-1.29886	0.287427	-4.51892	6.21555e-06	3.33576e-05	AC009145.2	lncRNA
ENSG00000235141.1	0.595999	-1.29798	0.400894	-3.23772	0.00120489	0.00359216	COX6CP17	processed_pseudogene
ENSG00000243437.3	0.879408	-1.2975	0.346708	-3.74233	0.000182325	0.000673659	RN7SL370P	misc_RNA
ENSG00000208022.1	0.3298	-1.29736	0.864427	-1.50084	0.133398	0.207359	MIR618	miRNA
ENSG00000244470.2	1.23899	-1.29712	0.226422	-5.72878	1.01153e-08	1.04372e-07	AC105918.1	processed_pseudogene
ENSG00000279420.1	0.737639	-1.29707	0.306001	-4.23876	2.24756e-05	0.000104971	AC138627.2	TEC
ENSG00000257105.1	0.522363	-1.29696	0.367307	-3.531	0.000413997	0.00139968	AC006581.1	lncRNA
ENSG00000207641.1	1.1184	-1.29685	0.193254	-6.71061	1.93818e-11	3.61212e-10	MIR510	miRNA
ENSG00000286649.1	1.19637	-1.29677	0.247646	-5.2364	1.63739e-07	1.29212e-06	AC006566.2	lncRNA
ENSG00000241391.3	0.578882	-1.29673	0.333083	-3.89313	9.89588e-05	0.000391848	RN7SL234P	misc_RNA
ENSG00000252230.1	1.01683	-1.29595	0.274097	-4.72808	2.26652e-06	1.35544e-05	AC020910.1	snoRNA
ENSG00000173610.12	1.02613	-1.29483	0.313324	-4.13257	3.58729e-05	0.000159176	UGT2A1	protein_coding
ENSG00000234788.1	1.77271	-1.29478	0.213909	-6.05294	1.4223e-09	1.78531e-08	HSPA8P3	processed_pseudogene
ENSG00000240317.3	0.422938	-1.29448	0.410752	-3.1515	0.00162437	0.00466893	RN7SL764P	misc_RNA
ENSG00000259188.6	2.39383	-1.29414	0.190795	-6.7829	1.17788e-11	2.28508e-10	AC025040.1	lncRNA
ENSG00000249772.1	0.744385	-1.29408	0.255049	-5.07387	3.89813e-07	2.81885e-06	AC026427.1	lncRNA
ENSG00000286637.1	1.22635	-1.29369	0.257883	-5.01658	5.25992e-07	3.6718e-06	AC093765.2	lncRNA
ENSG00000279555.1	10.3899	-1.29354	0.148651	-8.70187	3.26464e-18	2.17918e-16	AC091181.1	TEC
ENSG00000259177.1	1.52555	-1.2935	0.258512	-5.00365	5.62551e-07	3.90071e-06	AC018946.1	lncRNA
ENSG00000200855.1	0.581175	-1.29282	0.304631	-4.24389	2.19678e-05	0.000102858	Y_RNA	misc_RNA
ENSG00000236860.1	0.690258	-1.29269	0.327398	-3.94838	7.86812e-05	0.00031957	RPL39P29	processed_pseudogene
ENSG00000229005.2	7.50714	-1.2924	0.189888	-6.80612	1.00268e-11	1.97445e-10	HNF4A-AS1	lncRNA
ENSG00000201034.1	1.04874	-1.29225	0.268478	-4.81324	1.48505e-06	9.2916e-06	Y_RNA	misc_RNA
ENSG00000230166.1	0.738258	-1.29209	0.309687	-4.17225	3.01608e-05	0.000136482	RPL35AP24	processed_pseudogene
ENSG00000252349.1	1.6127	-1.29141	0.195878	-6.59296	4.31143e-11	7.46046e-10	AC005722.2	snoRNA
ENSG00000263693.1	0.559976	-1.29124	0.305428	-4.22764	2.36154e-05	0.000109661	MIR3161	miRNA
ENSG00000236388.1	0.789644	-1.29118	0.290894	-4.43865	9.05243e-06	4.66699e-05	ITCH-AS1	lncRNA
ENSG00000268051.1	1.35911	-1.29078	0.275051	-4.69287	2.69402e-06	1.57886e-05	AC008395.1	lncRNA
ENSG00000277157.2	6.50637	-1.29062	0.190507	-6.77465	1.24709e-11	2.41199e-10	H4C4	protein_coding
ENSG00000168298.7	18.6448	-1.28962	0.161095	-8.00535	1.1913e-15	5.01326e-14	H1-4	protein_coding
ENSG00000259722.2	0.697278	-1.28922	0.391387	-3.29398	0.000987779	0.00301411	AC087465.1	processed_pseudogene
ENSG00000229668.1	0.542033	-1.28882	0.365099	-3.53007	0.000415448	0.00140373	AL133384.1	processed_pseudogene
ENSG00000264623.3	0.428668	-1.28871	0.416044	-3.09753	0.00195138	0.00549152	MIR4796	miRNA
ENSG00000234418.2	1.37466	-1.28841	0.23489	-5.48518	4.13051e-08	3.74014e-07	AC015983.2	lncRNA
ENSG00000234637.1	1.24006	-1.28813	0.218942	-5.88344	4.01832e-09	4.58194e-08	RPS19P6	processed_pseudogene
ENSG00000287292.1	4.64719	-1.28802	0.172084	-7.48481	7.16515e-14	2.1746e-12	AC002460.2	lncRNA
ENSG00000224142.1	0.948321	-1.28772	0.288309	-4.46645	7.95275e-06	4.15587e-05	AMMECR1-IT1	lncRNA
ENSG00000270487.1	0.528422	-1.28769	0.431035	-2.98745	0.00281318	0.00756395	AL355297.1	lncRNA
ENSG00000249691.1	0.966305	-1.28574	0.342516	-3.75381	0.000174169	0.00064691	AC026117.1	processed_pseudogene
ENSG00000267177.1	0.6587	-1.28533	0.362022	-3.55041	0.000384631	0.00131105	AP002505.1	lncRNA
ENSG00000225076.1	1.95232	-1.2853	0.214667	-5.98745	2.13161e-09	2.59163e-08	WWC3-AS1	lncRNA
ENSG00000234828.9	1.38247	-1.28465	0.254136	-5.05497	4.30466e-07	3.07536e-06	IQCM	protein_coding
ENSG00000058404.20	166.075	-1.28453	0.172531	-7.44519	9.68042e-14	2.86952e-12	CAMK2B	protein_coding
ENSG00000251892.1	2.42253	-1.28415	0.18233	-7.04297	1.88186e-12	4.30114e-11	RNU7-84P	snRNA
ENSG00000201413.1	0.419487	-1.28412	0.915854	-1.4021	0.160886	0.241834	RNA5SP141	rRNA_pseudogene
ENSG00000259057.1	0.843276	-1.2841	0.286118	-4.488	7.18935e-06	3.7993e-05	THRAP3P2	processed_pseudogene
ENSG00000201616.1	0.702256	-1.28383	0.303171	-4.23468	2.28876e-05	0.000106637	RNU1-91P	snRNA
ENSG00000265494.1	1.26417	-1.28349	0.302657	-4.24072	2.22799e-05	0.000104155	AC005304.2	lncRNA
ENSG00000221537.1	0.739138	-1.28343	0.310173	-4.13779	3.50671e-05	0.000155911	MIR548H1	miRNA
ENSG00000004846.16	22.5809	-1.28338	0.206787	-6.20631	5.4244e-10	7.50266e-09	ABCB5	protein_coding
ENSG00000259587.3	1.9393	-1.28295	0.225779	-5.68232	1.32878e-08	1.33246e-07	AC114546.2	lncRNA
ENSG00000254758.1	0.610249	-1.28253	0.31281	-4.10005	4.13069e-05	0.000180553	AP000889.1	unprocessed_pseudogene
ENSG00000236939.2	7.42359	-1.28246	0.162657	-7.88444	3.15937e-15	1.23607e-13	BAALC-AS2	lncRNA
ENSG00000255484.2	1.19093	-1.28209	0.265733	-4.82473	1.4019e-06	8.8197e-06	LINC02764	lncRNA
ENSG00000261404.7	14.6807	-1.28195	0.136645	-9.38163	6.49612e-21	6.94181e-19	AC138627.1	lncRNA
ENSG00000238295.1	0.643587	-1.28148	0.282192	-4.54116	5.59466e-06	3.04308e-05	AC019080.2	snoRNA
ENSG00000132464.13	438.851	-1.28109	0.139952	-9.15377	5.49824e-20	5.02666e-18	ENAM	protein_coding
ENSG00000253532.1	1.10651	-1.28107	0.267449	-4.78996	1.66818e-06	1.03032e-05	AC107909.1	lncRNA
ENSG00000171815.6	15.7382	-1.28102	0.186759	-6.8592	6.92448e-12	1.41292e-10	PCDHB1	protein_coding
ENSG00000198780.12	68.9846	-1.28095	0.130908	-9.78512	1.30439e-22	1.92303e-20	FAM169A	protein_coding
ENSG00000286081.1	2.90525	-1.28083	0.243715	-5.25545	1.47666e-07	1.17591e-06	AC016682.1	lncRNA
ENSG00000229502.5	1.83002	-1.28004	0.241439	-5.3017	1.14728e-07	9.3794e-07	AL391863.1	lncRNA
ENSG00000228024.1	7.17744	-1.27988	0.19031	-6.72523	1.75319e-11	3.28939e-10	CYP1D1P	unprocessed_pseudogene
ENSG00000223409.1	0.605716	-1.27975	0.307096	-4.16726	3.08287e-05	0.000139049	RPL17P17	processed_pseudogene
ENSG00000158022.7	39.4771	-1.27909	0.184379	-6.93727	3.99736e-12	8.52777e-11	TRIM63	protein_coding
ENSG00000233186.2	1.20429	-1.27892	0.337855	-3.78542	0.00015345	0.000577812	KLF4P1	processed_pseudogene
ENSG00000251436.2	2.92243	-1.27878	0.234588	-5.45118	5.00356e-08	4.44924e-07	NUP58P1	processed_pseudogene
ENSG00000232261.1	1.31886	-1.27867	0.294022	-4.3489	1.36823e-05	6.74465e-05	Z98751.1	unprocessed_pseudogene
ENSG00000224733.1	1.13322	-1.27865	0.245871	-5.20047	1.9878e-07	1.53811e-06	AL034349.1	lncRNA
ENSG00000265113.1	1.36786	-1.278	0.267116	-4.78445	1.71458e-06	1.056e-05	AC026474.1	lncRNA
ENSG00000225703.1	2.01098	-1.27727	0.253039	-5.04772	4.47121e-07	3.18209e-06	AC114737.1	lncRNA
ENSG00000169302.16	267.762	-1.27694	0.173647	-7.35365	1.92862e-13	5.36338e-12	STK32A	protein_coding
ENSG00000237136.8	8.34971	-1.27686	0.166136	-7.6856	1.52283e-14	5.22349e-13	C4orf51	protein_coding
ENSG00000214651.4	0.883922	-1.27642	0.27366	-4.66424	3.09753e-06	1.78341e-05	AL513122.1	processed_pseudogene
ENSG00000267647.1	0.43604	-1.27632	0.373967	-3.41292	0.000642718	0.00206195	MAP1LC3P	processed_pseudogene
ENSG00000266599.1	0.617366	-1.27617	0.286926	-4.44774	8.67798e-06	4.49424e-05	AC079336.4	lncRNA
ENSG00000234452.5	9.30022	-1.27597	0.147824	-8.63169	6.04506e-18	3.81224e-16	SLC16A12-AS1	lncRNA
ENSG00000257119.1	0.677152	-1.27597	0.256899	-4.96682	6.80611e-07	4.62427e-06	EEF1B2P4	processed_pseudogene
ENSG00000241652.3	0.781251	-1.27591	0.293195	-4.35175	1.35056e-05	6.66863e-05	RN7SL253P	misc_RNA
ENSG00000242795.2	3.16364	-1.27559	0.242224	-5.26617	1.39297e-07	1.11867e-06	AC007849.1	lncRNA
ENSG00000248711.1	0.928804	-1.27538	0.240736	-5.29786	1.17168e-07	9.56133e-07	THUMPD3P1	unprocessed_pseudogene
ENSG00000276645.1	1.8984	-1.27373	0.210072	-6.0633	1.33355e-09	1.6834e-08	Metazoa_SRP	misc_RNA
ENSG00000227418.6	28.7044	-1.27356	0.300506	-4.23806	2.25463e-05	0.000105267	PCGEM1	lncRNA
ENSG00000232493.2	1.97902	-1.27287	0.202325	-6.29118	3.15062e-10	4.60068e-09	RPL12P11	processed_pseudogene
ENSG00000255321.1	1.8865	-1.27242	0.267935	-4.74897	2.04454e-06	1.23664e-05	AC068389.3	lncRNA
ENSG00000266998.1	4.14783	-1.27235	0.173224	-7.34512	2.05572e-13	5.6955e-12	AC111182.1	lncRNA
ENSG00000230536.1	1.20407	-1.27212	0.260104	-4.89084	1.00408e-06	6.53532e-06	AL360268.1	lncRNA
ENSG00000287833.1	0.606933	-1.27212	0.329574	-3.85989	0.000113439	0.000442844	AL157997.1	lncRNA
ENSG00000242958.1	0.864077	-1.27181	0.258477	-4.92039	8.63719e-07	5.71317e-06	AC040975.1	processed_pseudogene
ENSG00000251061.2	1.22937	-1.27153	0.494568	-2.57099	0.0101407	0.0231964	LINC02512	lncRNA
ENSG00000186510.12	154.803	-1.27107	0.19161	-6.63363	3.27525e-11	5.84933e-10	CLCNKA	protein_coding
ENSG00000279725.1	10.2392	-1.27107	0.223071	-5.69805	1.21187e-08	1.22711e-07	AL391005.1	TEC
ENSG00000263969.2	0.858676	-1.27085	0.275207	-4.6178	3.87834e-06	2.18328e-05	RN7SL678P	misc_RNA
ENSG00000250406.2	0.830873	-1.27005	0.296565	-4.28255	1.84767e-05	8.81148e-05	AC109811.1	lncRNA
ENSG00000207627.1	2.57786	-1.27002	0.253115	-5.01756	5.23324e-07	3.65547e-06	MIR581	miRNA
ENSG00000254528.7	56.7609	-1.27002	0.132806	-9.56297	1.14423e-21	1.38813e-19	AP000757.1	lncRNA
ENSG00000202059.1	0.896378	-1.26959	0.273868	-4.63579	3.55577e-06	2.0179e-05	AC023271.1	snoRNA
ENSG00000254864.1	1.69745	-1.26917	0.226901	-5.59352	2.22514e-08	2.13191e-07	AC107884.2	lncRNA
ENSG00000266720.2	0.333745	-1.26894	0.917798	-1.38259	0.166789	0.249143	RN7SL14P	misc_RNA
ENSG00000207438.1	0.895261	-1.2687	0.255144	-4.97251	6.6093e-07	4.50706e-06	Y_RNA	misc_RNA
ENSG00000095713.14	502.645	-1.26852	0.19	-6.67642	2.4485e-11	4.49545e-10	CRTAC1	protein_coding
ENSG00000271459.1	1.39102	-1.26826	0.245232	-5.17169	2.31984e-07	1.76618e-06	Z98751.3	processed_pseudogene
ENSG00000225623.1	0.666781	-1.26792	0.32708	-3.87649	0.000105974	0.000416958	AGBL4-IT1	lncRNA
ENSG00000241395.3	1.2037	-1.26775	0.277572	-4.56727	4.94109e-06	2.72205e-05	RN7SL344P	misc_RNA
ENSG00000055957.11	60.8168	-1.26752	0.221945	-5.71096	1.12343e-08	1.14669e-07	ITIH1	protein_coding
ENSG00000265957.1	0.613186	-1.26745	0.366674	-3.45662	0.000547005	0.00178984	MIR4319	miRNA
ENSG00000266952.2	0.581469	-1.2665	0.383584	-3.30177	0.000960782	0.00294201	LINC01538	lncRNA
ENSG00000254187.1	0.964346	-1.26638	0.288923	-4.38311	1.16999e-05	5.86681e-05	AC008708.2	lncRNA
ENSG00000234325.1	0.55054	-1.26637	0.351668	-3.60103	0.000316959	0.00110284	MRPS10P2	processed_pseudogene
ENSG00000259926.1	2.25311	-1.26619	0.215755	-5.86867	4.39293e-09	4.95532e-08	AC007342.1	lncRNA
ENSG00000254813.5	1.38346	-1.266	0.296732	-4.26648	1.98583e-05	9.39986e-05	AC123777.1	lncRNA
ENSG00000229756.1	0.373427	-1.2654	0.776065	-1.63054	0.102988	0.167281	RPL31P20	processed_pseudogene
ENSG00000279996.1	2.59955	-1.26537	0.254135	-4.97914	6.38677e-07	4.36936e-06	AC004491.1	TEC
ENSG00000264940.5	0.707479	-1.26532	0.463426	-2.73035	0.00632665	0.0153622	SNORD3C	snoRNA
ENSG00000232407.3	1.31016	-1.26524	0.270209	-4.68243	2.83489e-06	1.65034e-05	PPIAP70	processed_pseudogene
ENSG00000132874.15	18.7192	-1.26301	0.154504	-8.17455	2.96966e-16	1.39618e-14	SLC14A2	protein_coding
ENSG00000242236.2	0.851702	-1.26189	0.301736	-4.18211	2.88818e-05	0.000131242	RN7SL594P	misc_RNA
ENSG00000270218.1	0.916272	-1.26151	0.241354	-5.22681	1.7246e-07	1.35218e-06	AC013553.2	processed_pseudogene
ENSG00000288545.1	5.2109	-1.26141	0.193181	-6.52969	6.59072e-11	1.10108e-09	AC023421.2	lncRNA
ENSG00000254653.1	1.34697	-1.26137	0.225813	-5.58593	2.32456e-08	2.21667e-07	AC024475.1	lncRNA
ENSG00000287227.1	1.99334	-1.26121	0.230815	-5.46416	4.65111e-08	4.16077e-07	AC021698.1	lncRNA
ENSG00000221091.1	0.930912	-1.26085	0.264076	-4.77455	1.80106e-06	1.10346e-05	MIR1302-5	miRNA
ENSG00000259463.1	0.979536	-1.26064	0.27199	-4.63489	3.57122e-06	2.0255e-05	AC020661.2	lncRNA
ENSG00000237832.1	0.451655	-1.26045	0.699412	-1.80215	0.0715212	0.123424	AL138808.1	lncRNA
ENSG00000243254.3	0.456449	-1.26008	0.527412	-2.38918	0.0168862	0.0359984	RN7SL350P	misc_RNA
ENSG00000206645.1	0.837776	-1.25979	0.248509	-5.06939	3.991e-07	2.87946e-06	Y_RNA	misc_RNA
ENSG00000261191.1	0.402741	-1.25885	0.415195	-3.03195	0.00242981	0.00665616	AC013640.1	lncRNA
ENSG00000269256.1	0.464531	-1.25869	0.31136	-4.04256	5.28715e-05	0.000224147	AC024603.1	lncRNA
ENSG00000237289.10	34.5874	-1.25857	0.258488	-4.86897	1.12183e-06	7.22258e-06	CKMT1B	protein_coding
ENSG00000240589.3	1.56131	-1.25851	0.217231	-5.79344	6.89575e-09	7.43749e-08	RN7SL258P	misc_RNA
ENSG00000248831.2	0.35424	-1.25851	0.671901	-1.87305	0.0610609	0.108057	AC008638.1	processed_pseudogene
ENSG00000260848.2	1.06022	-1.25839	0.315064	-3.99408	6.49465e-05	0.000269087	AC092114.1	lncRNA
ENSG00000237446.1	1.63099	-1.25831	0.232601	-5.40975	6.31119e-08	5.47105e-07	RHEBP3	processed_pseudogene
ENSG00000233021.2	0.675228	-1.25821	0.312318	-4.02861	5.61066e-05	0.000236355	AL669841.1	lncRNA
ENSG00000277911.1	1.29319	-1.25756	0.26484	-4.74837	2.05068e-06	1.23968e-05	AC243773.2	lncRNA
ENSG00000224310.1	5.87015	-1.25742	0.220146	-5.71177	1.11807e-08	1.142e-07	LINC01567	lncRNA
ENSG00000201547.1	1.38972	-1.25735	0.262878	-4.78303	1.72672e-06	1.06231e-05	Y_RNA	misc_RNA
ENSG00000200086.1	0.513723	-1.25678	0.442802	-2.83825	0.00453619	0.0114962	RNU6-433P	snRNA
ENSG00000285595.1	2.51806	-1.25667	0.233487	-5.38219	7.35835e-08	6.27977e-07	AC105114.2	lncRNA
ENSG00000259547.1	0.865091	-1.2564	0.334273	-3.75861	0.000170859	0.000635894	CYCSP2	processed_pseudogene
ENSG00000259202.1	1.13229	-1.25608	0.269216	-4.66571	3.0755e-06	1.77302e-05	AC012568.1	lncRNA
ENSG00000248967.1	1.10571	-1.25604	0.307859	-4.07991	4.50532e-05	0.000194899	AC022493.2	processed_pseudogene
ENSG00000174473.16	15.2716	-1.25601	0.165218	-7.60213	2.91303e-14	9.49465e-13	GALNTL6	protein_coding
ENSG00000227948.4	2.40905	-1.25524	0.250355	-5.01382	5.33586e-07	3.7184e-06	AC003989.1	processed_pseudogene
ENSG00000254791.1	1.56968	-1.25506	0.210365	-5.96611	2.42978e-09	2.90809e-08	FAR1-IT1	lncRNA
ENSG00000236427.1	2.93268	-1.25485	0.217616	-5.76636	8.10035e-09	8.57674e-08	AL589986.2	lncRNA
ENSG00000271350.1	0.524272	-1.25462	0.336482	-3.72864	0.000192513	0.000707023	AC103792.1	processed_pseudogene
ENSG00000184276.3	0.78491	-1.25445	0.254795	-4.92338	8.50612e-07	5.64072e-06	DEFB108B	protein_coding
ENSG00000149599.15	255.059	-1.25438	0.143819	-8.72196	2.73422e-18	1.8529e-16	DUSP15	protein_coding
ENSG00000225497.5	0.577293	-1.25416	0.364097	-3.44456	0.000571989	0.00186214	KCNMA1-AS2	lncRNA
ENSG00000201229.1	0.679156	-1.25401	0.305181	-4.10906	3.97273e-05	0.000174247	SNORA63D	snoRNA
ENSG00000225349.2	2.04415	-1.25392	0.277662	-4.516	6.30193e-06	3.37642e-05	ANKRD49P2	processed_pseudogene
ENSG00000257474.5	2.39419	-1.25392	0.199395	-6.28862	3.20297e-10	4.67254e-09	AC027288.1	lncRNA
ENSG00000240606.3	0.805604	-1.25321	0.361438	-3.46728	0.000525758	0.00172883	RN7SL564P	misc_RNA
ENSG00000200397.1	1.44084	-1.25314	0.220643	-5.6795	1.35088e-08	1.35158e-07	Y_RNA	misc_RNA
ENSG00000221325.1	0.394267	-1.25258	0.537841	-2.3289	0.0198645	0.0413884	MIR1200	miRNA
ENSG00000258485.2	2.13629	-1.25253	0.2202	-5.68815	1.28422e-08	1.29273e-07	SRMP2	processed_pseudogene
ENSG00000258502.6	1.47853	-1.25179	0.225346	-5.55495	2.77694e-08	2.60729e-07	LINC02290	lncRNA
ENSG00000232268.6	1.55191	-1.25146	0.23337	-5.36256	8.2052e-08	6.93338e-07	OR52I1	protein_coding
ENSG00000287282.1	2.21021	-1.2512	0.216349	-5.78324	7.32737e-09	7.83657e-08	AL031726.2	lncRNA
ENSG00000239686.1	1.53874	-1.25099	0.236383	-5.29223	1.20832e-07	9.82971e-07	AL158801.1	processed_pseudogene
ENSG00000100095.19	23.7672	-1.25064	0.141744	-8.82318	1.11254e-18	8.08054e-17	SEZ6L	protein_coding
ENSG00000187918.5	1.01067	-1.25047	0.280967	-4.45057	8.5641e-06	4.44405e-05	OR51I2	protein_coding
ENSG00000221303.1	0.424621	-1.24963	0.444424	-2.81179	0.00492668	0.0123439	SNORA79	snoRNA
ENSG00000213287.3	0.723597	-1.2494	0.297731	-4.19639	2.71202e-05	0.000124136	AP001102.1	processed_pseudogene
ENSG00000254582.1	1.49607	-1.24939	0.209258	-5.97057	2.36431e-09	2.83813e-08	PSMA2P1	processed_pseudogene
ENSG00000241568.3	2.21616	-1.24758	0.19539	-6.38509	1.71297e-10	2.6399e-09	RN7SL338P	misc_RNA
ENSG00000259481.1	3.07908	-1.24739	0.198336	-6.28928	3.18946e-10	4.65587e-09	AC012404.1	lncRNA
ENSG00000224029.1	0.809506	-1.24731	0.283442	-4.40058	1.0796e-05	5.46214e-05	AL450344.1	lncRNA
ENSG00000279597.1	1.28098	-1.24717	0.332669	-3.74898	0.000177557	0.000657959	AL031593.1	lncRNA
ENSG00000199938.1	0.372755	-1.24714	0.637122	-1.95746	0.0502936	0.0917174	Y_RNA	misc_RNA
ENSG00000278413.1	0.738422	-1.24688	0.286118	-4.35793	1.31297e-05	6.50685e-05	AL159159.1	misc_RNA
ENSG00000227597.1	1.36023	-1.24683	0.251798	-4.9517	7.35666e-07	4.95478e-06	WASF1P1	processed_pseudogene
ENSG00000198744.5	426.829	-1.24653	0.159665	-7.80716	5.84925e-15	2.15406e-13	MTCO3P12	unprocessed_pseudogene
ENSG00000188730.5	24.8696	-1.24637	0.240648	-5.17923	2.22804e-07	1.70328e-06	VWC2	protein_coding
ENSG00000253116.1	1.8874	-1.24626	0.215556	-5.78158	7.4002e-09	7.90653e-08	AC027698.1	lncRNA
ENSG00000227588.2	1.1312	-1.2459	0.240397	-5.18266	2.18743e-07	1.67742e-06	CNTN4-AS2	lncRNA
ENSG00000235637.1	0.742726	-1.24573	0.318203	-3.9149	9.04401e-05	0.000361557	AC069023.1	lncRNA
ENSG00000265154.1	0.608203	-1.24518	0.312493	-3.98467	6.75752e-05	0.00027894	MIR151B	miRNA
ENSG00000224525.2	0.857307	-1.24501	0.327514	-3.80141	0.000143873	0.000545718	AL591686.1	lncRNA
ENSG00000268717.1	0.863723	-1.24456	0.379354	-3.28074	0.00103536	0.00314228	BNIP3P33	processed_pseudogene
ENSG00000223224.1	1.20428	-1.24452	0.246826	-5.0421	4.60463e-07	3.26452e-06	SNORD71	snoRNA
ENSG00000007306.15	2.25746	-1.24421	0.357893	-3.47648	0.000508042	0.00167801	CEACAM7	protein_coding
ENSG00000235224.1	0.740335	-1.2442	0.333219	-3.73389	0.000188547	0.000694005	AL591212.2	processed_pseudogene
ENSG00000259993.1	0.441554	-1.24371	0.453194	-2.74432	0.00606365	0.0147962	AC135731.1	processed_pseudogene
ENSG00000278862.1	1.3969	-1.24349	0.310522	-4.00451	6.21457e-05	0.000258977	AC092724.1	TEC
ENSG00000271771.1	1.85957	-1.2431	0.227355	-5.46767	4.5598e-08	4.09142e-07	AC139792.1	lncRNA
ENSG00000261633.1	5.97658	-1.24299	0.16093	-7.72376	1.12947e-14	3.96274e-13	AC018552.3	lncRNA
ENSG00000287906.1	29.5786	-1.24276	0.18702	-6.64506	3.03094e-11	5.46595e-10	AC127526.5	lncRNA
ENSG00000199977.1	1.21077	-1.24243	0.243208	-5.10853	3.24676e-07	2.39291e-06	SNORA73	snoRNA
ENSG00000274023.1	1.41536	-1.24237	0.251884	-4.93232	8.12575e-07	5.42322e-06	AL360169.2	lncRNA
ENSG00000239576.1	0.800732	-1.24205	0.336663	-3.68929	0.000224882	0.000811642	COX6CP14	processed_pseudogene
ENSG00000244464.2	2.13361	-1.24171	0.2424	-5.12256	3.01415e-07	2.23553e-06	AC107029.2	lncRNA
ENSG00000286536.1	1.88967	-1.24153	0.218735	-5.67596	1.37915e-08	1.37708e-07	AL591506.1	lncRNA
ENSG00000223915.1	0.653672	-1.24122	0.342077	-3.62847	0.000285106	0.00100259	DPPA2P1	processed_pseudogene
ENSG00000234784.2	0.534096	-1.24105	0.357308	-3.47332	0.000514054	0.00169535	AL606517.2	processed_pseudogene
ENSG00000147896.3	3.02784	-1.2409	0.215096	-5.76905	7.97212e-09	8.44699e-08	IFNK	protein_coding
ENSG00000258402.1	0.469913	-1.24087	0.431484	-2.87583	0.00402971	0.0103475	AC016526.1	lncRNA
ENSG00000250001.1	0.5593	-1.24084	0.358103	-3.46503	0.000530172	0.00174141	AC027335.1	lncRNA
ENSG00000251276.1	0.37064	-1.24046	0.56672	-2.18885	0.028608	0.0566472	MAGI2-AS1	lncRNA
ENSG00000225117.2	1.31165	-1.23995	0.271351	-4.56953	4.88825e-06	2.6969e-05	ARSDP1	unprocessed_pseudogene
ENSG00000258604.1	2.51859	-1.23974	0.189758	-6.53328	6.43434e-11	1.07738e-09	AL161668.4	lncRNA
ENSG00000232455.2	1.69659	-1.23943	0.260646	-4.75521	1.98237e-06	1.20332e-05	LARS2-AS1	lncRNA
ENSG00000254450.1	0.838828	-1.23902	0.311091	-3.98284	6.80978e-05	0.000280967	ALG9-IT1	lncRNA
ENSG00000231857.1	0.464691	-1.23871	0.460934	-2.68739	0.0072013	0.017175	MORF4L1P5	processed_pseudogene
ENSG00000207320.1	0.417018	-1.23821	0.493402	-2.50954	0.0120889	0.0269886	Y_RNA	misc_RNA
ENSG00000152822.14	21.2981	-1.23811	0.134252	-9.22227	2.90879e-20	2.77319e-18	GRM1	protein_coding
ENSG00000222610.1	0.514698	-1.23772	0.30908	-4.00452	6.21445e-05	0.000258977	RNU6-402P	snRNA
ENSG00000223324.1	1.06927	-1.23762	0.240143	-5.15365	2.55465e-07	1.92749e-06	RN7SKP273	misc_RNA
ENSG00000253778.1	0.549304	-1.23726	0.306604	-4.03536	5.45176e-05	0.000230293	AC090572.2	lncRNA
ENSG00000238021.6	2.3871	-1.23724	0.208759	-5.92665	3.09171e-09	3.61672e-08	ARMC4P1	transcribed_unprocessed_pseudogene
ENSG00000154438.8	1.10829	-1.23712	0.302795	-4.08567	4.39491e-05	0.000190449	ASZ1	protein_coding
ENSG00000286642.1	2.00518	-1.23693	0.290621	-4.25617	2.07955e-05	9.79248e-05	AC091646.1	lncRNA
ENSG00000287503.1	1.44854	-1.23693	0.222345	-5.56309	2.65035e-08	2.50109e-07	AC027243.3	lncRNA
ENSG00000259109.1	0.707058	-1.2369	0.326254	-3.79121	0.000149915	0.000565889	AC004858.1	processed_pseudogene
ENSG00000207005.1	0.394975	-1.23673	0.463855	-2.66619	0.0076716	0.0181528	RNU1-2	snRNA
ENSG00000212549.1	0.585073	-1.23617	0.305616	-4.04485	5.2356e-05	0.000222195	RNA5SP354	rRNA_pseudogene
ENSG00000232292.1	0.428637	-1.23616	0.520749	-2.37381	0.0176055	0.0373351	ALDH7A1P2	processed_pseudogene
ENSG00000224340.1	1.3308	-1.23584	0.242863	-5.08863	3.60651e-07	2.62545e-06	AL590639.1	processed_pseudogene
ENSG00000226122.1	1.19516	-1.23534	0.234599	-5.26577	1.39601e-07	1.12031e-06	DDC-AS1	lncRNA
ENSG00000264421.1	1.33825	-1.23524	0.296016	-4.17287	3.00785e-05	0.000136138	AC007448.3	lncRNA
ENSG00000229105.1	3.35678	-1.2352	0.204291	-6.04626	1.48244e-09	1.85296e-08	ASTN2-AS1	lncRNA
ENSG00000266288.1	1.0109	-1.23518	0.255245	-4.8392	1.30362e-06	8.25854e-06	AP005671.1	lncRNA
ENSG00000267061.1	0.920807	-1.23508	0.480909	-2.56821	0.0102224	0.0233653	AC090213.1	lncRNA
ENSG00000258927.2	1.03542	-1.2349	0.424685	-2.90779	0.00363988	0.00947157	AL133467.2	lncRNA
ENSG00000288393.1	1.32949	-1.23459	0.241364	-5.11506	3.1364e-07	2.31809e-06	AP003086.3	transcribed_processed_pseudogene
ENSG00000251620.3	2.8886	-1.23437	0.178315	-6.9224	4.44059e-12	9.3834e-11	STPG2-AS1	lncRNA
ENSG00000248152.2	1.83839	-1.23375	0.264755	-4.65996	3.16275e-06	1.81814e-05	ANK2-AS1	lncRNA
ENSG00000285827.1	1.26298	-1.23351	0.240873	-5.12098	3.0395e-07	2.25283e-06	AP001267.5	protein_coding
ENSG00000224257.1	0.532942	-1.23326	0.376636	-3.27441	0.00105883	0.00320717	VWC2L-IT1	lncRNA
ENSG00000253924.2	0.73421	-1.23326	0.311758	-3.95581	7.62747e-05	0.000310845	AC103831.1	lncRNA
ENSG00000083720.13	2172.77	-1.23301	0.107436	-11.4767	1.72763e-30	7.39607e-28	OXCT1	protein_coding
ENSG00000272439.1	0.739285	-1.23298	0.285225	-4.32284	1.54035e-05	7.49685e-05	RNU6-91P	snRNA
ENSG00000250244.5	0.973086	-1.23292	0.321251	-3.83786	0.000124111	0.000479336	AC010307.4	lncRNA
ENSG00000206880.1	0.839717	-1.23239	0.293382	-4.20063	2.66171e-05	0.000122047	RNU6-1310P	snRNA
ENSG00000199536.1	1.96227	-1.23201	0.206174	-5.97559	2.29265e-09	2.76105e-08	RNU6-315P	snRNA
ENSG00000271704.1	1.32395	-1.23188	0.224155	-5.49565	3.89266e-08	3.54278e-07	BNIP3P20	processed_pseudogene
ENSG00000257501.6	2.86332	-1.23185	0.208063	-5.92055	3.20868e-09	3.74078e-08	PAFAH1B2P2	transcribed_processed_pseudogene
ENSG00000243986.2	1.24482	-1.23181	0.298926	-4.12077	3.77612e-05	0.000166591	ENO1P3	processed_pseudogene
ENSG00000207969.1	1.1442	-1.23142	0.237441	-5.18622	2.14611e-07	1.64857e-06	MIR507	miRNA
ENSG00000274810.4	1.33474	-1.2313	0.225135	-5.46918	4.52133e-08	4.05853e-07	NPHP3-ACAD11	protein_coding
ENSG00000261195.1	4.17787	-1.23101	0.15666	-7.85784	3.90823e-15	1.49105e-13	AC027130.1	lncRNA
ENSG00000256019.1	1.57416	-1.23085	0.249628	-4.93075	8.1914e-07	5.45966e-06	TAS2R63P	unprocessed_pseudogene
ENSG00000212257.1	1.17102	-1.23081	0.225401	-5.46056	4.74643e-08	4.23837e-07	RNU6-1176P	snRNA
ENSG00000207873.1	0.622038	-1.2307	0.275436	-4.46818	7.88868e-06	4.12578e-05	MIR513A1	miRNA
ENSG00000287813.1	1.02675	-1.23014	0.271135	-4.53701	5.70586e-06	3.09204e-05	AC016705.3	lncRNA
ENSG00000260113.3	1.51704	-1.23012	0.209322	-5.87671	4.18512e-09	4.75342e-08	AC093249.1	processed_pseudogene
ENSG00000199598.1	0.944369	-1.22944	0.246667	-4.98421	6.22162e-07	4.26819e-06	RNU6-859P	snRNA
ENSG00000228999.4	2.08451	-1.22937	0.250286	-4.91185	9.02195e-07	5.93242e-06	AC096570.1	lncRNA
ENSG00000225568.1	0.844873	-1.22912	0.255242	-4.8155	1.46832e-06	9.19724e-06	AC093155.1	processed_pseudogene
ENSG00000260594.1	0.706221	-1.22871	0.352057	-3.49008	0.000482879	0.00160502	AC099313.1	lncRNA
ENSG00000100867.15	92.8789	-1.22829	0.202124	-6.07691	1.2252e-09	1.56168e-08	DHRS2	protein_coding
ENSG00000237388.2	0.411526	-1.22771	0.6185	-1.98497	0.0471476	0.0868998	OR4A47	protein_coding
ENSG00000215409.4	1.41294	-1.22756	0.230579	-5.32382	1.01611e-07	8.41213e-07	AL355493.1	unprocessed_pseudogene
ENSG00000285900.1	1.32947	-1.22734	0.28853	-4.25377	2.10201e-05	9.8909e-05	AC079177.1	lncRNA
ENSG00000207117.1	0.910616	-1.2273	0.255428	-4.80488	1.5484e-06	9.6446e-06	Y_RNA	misc_RNA
ENSG00000255672.1	0.496576	-1.22724	0.34989	-3.50752	0.000452306	0.00151323	AP002892.1	lncRNA
ENSG00000250158.1	0.448352	-1.22673	0.370522	-3.31081	0.000930279	0.00286002	AC099509.2	lncRNA
ENSG00000204511.3	23.3109	-1.22614	0.227996	-5.37793	7.53483e-08	6.41808e-07	MCCD1	protein_coding
ENSG00000212526.1	1.34015	-1.22583	0.196592	-6.23539	4.50661e-10	6.34761e-09	RNU6-466P	snRNA
ENSG00000285936.1	0.906478	-1.22544	0.263191	-4.65608	3.2229e-06	1.85009e-05	AL392024.1	lncRNA
ENSG00000260733.1	7.41963	-1.22519	0.13388	-9.1514	5.61993e-20	5.10645e-18	AC046158.1	lncRNA
ENSG00000268992.1	1.36769	-1.22506	0.262349	-4.66959	3.01803e-06	1.74327e-05	CDC42EP3P1	processed_pseudogene
ENSG00000184357.5	2.38721	-1.22475	0.247405	-4.95036	7.40748e-07	4.98418e-06	H1-5	protein_coding
ENSG00000273090.1	1.00593	-1.22455	0.293622	-4.17051	3.03923e-05	0.00013732	AC007378.1	lncRNA
ENSG00000258537.5	0.796909	-1.22404	0.255412	-4.79243	1.64772e-06	1.01834e-05	FRMD6-AS2	lncRNA
ENSG00000267101.7	1.2256	-1.22391	0.298156	-4.10494	4.04423e-05	0.000177191	AC090376.1	lncRNA
ENSG00000157703.16	29.0969	-1.22385	0.21521	-5.68679	1.29447e-08	1.30128e-07	SVOPL	protein_coding
ENSG00000259505.1	2.36865	-1.2237	0.244505	-5.0048	5.59195e-07	3.87986e-06	AC009268.1	processed_pseudogene
ENSG00000250331.2	2.54598	-1.22367	0.207305	-5.90277	3.57453e-09	4.13052e-08	LINC01340	lncRNA
ENSG00000227863.3	0.685469	-1.22358	0.272883	-4.48389	7.32951e-06	3.86353e-05	AC002383.1	lncRNA
ENSG00000260551.1	0.813066	-1.22307	0.317709	-3.84964	0.00011829	0.000459324	PWRN2	lncRNA
ENSG00000199459.1	0.439727	-1.2228	0.418968	-2.9186	0.00351608	0.00919401	Y_RNA	misc_RNA
ENSG00000218857.1	0.834019	-1.22276	0.294233	-4.15577	3.24194e-05	0.000145491	AL137222.1	processed_pseudogene
ENSG00000288032.1	1.81509	-1.22254	0.224449	-5.44682	5.12772e-08	4.54512e-07	AC104472.5	lncRNA
ENSG00000200884.1	0.777552	-1.22194	0.334463	-3.65344	0.000258752	0.000919574	Y_RNA	misc_RNA
ENSG00000253335.1	0.465781	-1.22191	0.453253	-2.69588	0.00702037	0.0167948	AC009884.1	lncRNA
ENSG00000258419.1	0.507603	-1.22185	0.374522	-3.26241	0.00110467	0.00332815	AC022469.1	lncRNA
ENSG00000150672.17	197.012	-1.2212	0.102105	-11.9603	5.73438e-33	3.00367e-30	DLG2	protein_coding
ENSG00000244131.2	1.73263	-1.22078	0.272719	-4.47633	7.59365e-06	3.98931e-05	RPSAP51	processed_pseudogene
ENSG00000206595.1	0.655752	-1.22071	0.306956	-3.97684	6.98382e-05	0.000287376	RNU6-877P	snRNA
ENSG00000252184.1	0.389408	-1.22062	0.561546	-2.17367	0.0297297	0.0585171	RNU2-10P	snRNA
ENSG00000254112.1	0.755855	-1.22061	0.276851	-4.4089	1.03898e-05	5.28369e-05	AP003467.2	processed_pseudogene
ENSG00000131050.11	4.58764	-1.22058	0.241291	-5.05856	4.22436e-07	3.02576e-06	BPIFA2	protein_coding
ENSG00000230569.1	0.946441	-1.22043	0.267474	-4.5628	5.04757e-06	2.7738e-05	AC114763.2	lncRNA
ENSG00000270549.1	0.530262	-1.22024	0.317407	-3.84441	0.000120843	0.00046822	AL451044.1	processed_pseudogene
ENSG00000239702.3	0.49411	-1.22016	0.444751	-2.74348	0.00607918	0.0148268	RN7SL507P	misc_RNA
ENSG00000164946.20	279.808	-1.22006	0.17293	-7.05523	1.72318e-12	3.96286e-11	FREM1	protein_coding
ENSG00000226552.2	0.572293	-1.22004	0.301527	-4.0462	5.20547e-05	0.000221127	BX284613.1	processed_pseudogene
ENSG00000171505.5	1.31255	-1.21982	0.289906	-4.20765	2.58034e-05	0.000118634	OR1N1	protein_coding
ENSG00000251413.1	0.512588	-1.21975	0.370758	-3.28988	0.00100229	0.00305169	AC068898.2	lncRNA
ENSG00000185294.7	1.01441	-1.21953	0.234498	-5.20059	1.98657e-07	1.53743e-06	SPPL2C	protein_coding
ENSG00000253399.1	2.19461	-1.21942	0.217079	-5.61739	1.93859e-08	1.87553e-07	AC078852.1	lncRNA
ENSG00000206847.1	0.697865	-1.21929	0.297695	-4.09576	4.20791e-05	0.000183514	Y_RNA	misc_RNA
ENSG00000199733.1	0.616274	-1.21923	0.30874	-3.94907	7.84564e-05	0.000318715	RNA5SP307	rRNA_pseudogene
ENSG00000240454.1	0.515488	-1.21896	0.377346	-3.23034	0.00123643	0.00367486	RPL39P26	processed_pseudogene
ENSG00000241231.2	1.63063	-1.21851	0.261219	-4.66469	3.09088e-06	1.78051e-05	AC068308.1	lncRNA
ENSG00000270072.1	2.47898	-1.21847	0.21416	-5.68951	1.27403e-08	1.28334e-07	AC090559.2	lncRNA
ENSG00000254031.6	0.903955	-1.21729	0.319854	-3.80575	0.000141373	0.000537196	AC022858.1	lncRNA
ENSG00000239390.3	0.30533	-1.21678	0.944336	-1.2885	0.197572	0.286252	RN7SL87P	misc_RNA
ENSG00000177992.10	3.58895	-1.21646	0.17304	-7.02995	2.06615e-12	4.67435e-11	SPATA31E1	protein_coding
ENSG00000270915.1	1.33096	-1.21642	0.249116	-4.88295	1.04512e-06	6.77319e-06	H3P8	processed_pseudogene
ENSG00000248729.1	1.07862	-1.21598	0.215485	-5.643	1.67116e-08	1.63815e-07	MTCO1P30	processed_pseudogene
ENSG00000266318.1	0.827607	-1.21569	0.258408	-4.70452	2.54462e-06	1.50058e-05	MIR5692A1	miRNA
ENSG00000283611.2	2.61395	-1.21523	0.196028	-6.19925	5.67324e-10	7.81286e-09	TMEM274P	unitary_pseudogene
ENSG00000258954.1	1.2818	-1.21475	0.274062	-4.4324	9.31894e-06	4.78831e-05	AC107958.3	lncRNA
ENSG00000217231.2	0.543713	-1.21472	0.375201	-3.23751	0.00120579	0.00359435	AL109755.1	processed_pseudogene
ENSG00000202217.1	0.434791	-1.21469	0.789469	-1.53862	0.123896	0.195044	RN7SKP47	misc_RNA
ENSG00000252712.1	0.434109	-1.21428	0.432412	-2.80816	0.00498251	0.0124641	SCARNA14	scaRNA
ENSG00000187527.11	7.05229	-1.21391	0.177635	-6.83376	8.27163e-12	1.65816e-10	ATP13A5	protein_coding
ENSG00000201342.1	0.607533	-1.21363	0.283007	-4.28833	1.80022e-05	8.61562e-05	RNU4-38P	snRNA
ENSG00000224273.2	0.805052	-1.21356	0.292324	-4.15141	3.30429e-05	0.000147977	AC005077.2	transcribed_unprocessed_pseudogene
ENSG00000146021.15	593.959	-1.21295	0.125961	-9.6296	5.99616e-22	7.7833e-20	KLHL3	protein_coding
ENSG00000267385.1	7.16056	-1.21284	0.185392	-6.54201	6.06962e-11	1.02208e-09	AC011498.4	protein_coding
ENSG00000283197.1	0.690176	-1.21277	0.335924	-3.61024	0.000305917	0.00106835	AC103706.3	processed_pseudogene
ENSG00000156920.11	8.02311	-1.21272	0.2448	-4.95391	7.27363e-07	4.90375e-06	ADGRG4	protein_coding
ENSG00000240639.3	0.35044	-1.21228	0.966892	-1.25379	0.209919	0.300831	RN7SL666P	misc_RNA
ENSG00000265396.1	0.819933	-1.21206	0.255702	-4.74011	2.13598e-06	1.28601e-05	MIR3128	miRNA
ENSG00000222024.2	0.51578	-1.21089	0.4298	-2.81733	0.00484253	0.0121563	AC004945.1	processed_pseudogene
ENSG00000259575.1	6.15885	-1.21071	0.160885	-7.52535	5.25791e-14	1.64049e-12	AC012404.2	lncRNA
ENSG00000255727.2	6.49548	-1.21059	0.161426	-7.49934	6.41411e-14	1.96272e-12	LINC01489	lncRNA
ENSG00000241535.1	1.38035	-1.21014	0.211014	-5.7349	9.75672e-09	1.00985e-07	CBX5P1	processed_pseudogene
ENSG00000195401.2	0.744974	-1.20998	0.408625	-2.96109	0.00306548	0.00815806	Y_RNA	misc_RNA
ENSG00000227795.1	0.492807	-1.20983	0.411838	-2.93764	0.00330723	0.00871288	MTND4LP9	processed_pseudogene
ENSG00000236447.2	0.747058	-1.20939	0.382443	-3.16228	0.00156541	0.00451815	ATG10-IT1	lncRNA
ENSG00000212534.1	0.938778	-1.20898	0.274511	-4.40413	1.06211e-05	5.38532e-05	SNORD70	snoRNA
ENSG00000236049.1	1.35842	-1.20862	0.34573	-3.49586	0.000472536	0.00157311	LINC01920	lncRNA
ENSG00000224092.1	0.642742	-1.20831	0.516539	-2.33925	0.0193226	0.0404676	AL591644.1	processed_pseudogene
ENSG00000286797.1	25.6131	-1.20752	0.249442	-4.84091	1.29248e-06	8.19499e-06	AC009315.1	lncRNA
ENSG00000252473.1	3.1294	-1.20737	0.167234	-7.21964	5.21237e-13	1.32763e-11	AC007684.1	snoRNA
ENSG00000231906.1	0.631491	-1.207	0.32213	-3.74695	0.000179001	0.000662758	AC016397.1	processed_pseudogene
ENSG00000230751.1	3.30531	-1.20686	0.177786	-6.78829	1.13469e-11	2.20899e-10	AC007036.2	lncRNA
ENSG00000251165.6	3.8657	-1.2067	0.208127	-5.79788	6.716e-09	7.25944e-08	F11-AS1	lncRNA
ENSG00000181541.6	0.837225	-1.20543	0.284592	-4.23563	2.27911e-05	0.000106265	MAB21L2	protein_coding
ENSG00000269431.1	1.47695	-1.2052	0.263709	-4.57018	4.87301e-06	2.68882e-05	BNIP3P8	processed_pseudogene
ENSG00000244335.3	0.990891	-1.20485	0.335487	-3.59133	0.000328995	0.00114053	RN7SL687P	misc_RNA
ENSG00000287816.1	0.529275	-1.20472	0.474706	-2.53783	0.0111544	0.0252081	AL133475.1	lncRNA
ENSG00000250219.2	0.475719	-1.20466	0.446059	-2.70067	0.00691999	0.016585	LTV1P1	processed_pseudogene
ENSG00000249916.1	0.696552	-1.20459	0.451436	-2.66836	0.00762235	0.0180525	AC119150.1	lncRNA
ENSG00000230333.6	14.0779	-1.20407	0.138718	-8.67997	3.95858e-18	2.59953e-16	AC004160.1	lncRNA
ENSG00000251783.1	1.17094	-1.20402	0.228895	-5.26015	1.43936e-07	1.14991e-06	RNU6-1170P	snRNA
ENSG00000234445.1	1.53724	-1.20374	0.203897	-5.90365	3.55539e-09	4.10947e-08	FGF14-AS1	lncRNA
ENSG00000285898.1	1.80806	-1.20307	0.193004	-6.23338	4.56479e-10	6.42346e-09	AC007317.1	lncRNA
ENSG00000249976.2	0.663599	-1.20281	0.32703	-3.67798	0.000235092	0.00084391	AC108157.1	processed_pseudogene
ENSG00000275337.1	0.436741	-1.20235	0.628276	-1.91373	0.0556542	0.0999756	RN7SL680P	misc_RNA
ENSG00000259474.1	1.95994	-1.2023	0.215318	-5.58381	2.35305e-08	2.24096e-07	AC027228.1	lncRNA
ENSG00000243426.3	0.417189	-1.20149	0.465576	-2.58066	0.00986103	0.0226311	RN7SL454P	misc_RNA
ENSG00000268794.1	0.68049	-1.20135	0.269889	-4.45128	8.5361e-06	4.4321e-05	VN1R90P	unprocessed_pseudogene
ENSG00000277946.1	0.732287	-1.20119	0.322823	-3.72089	0.000198523	0.000726221	RN7SL478P	misc_RNA
ENSG00000239888.3	0.568778	-1.20079	0.373218	-3.2174	0.00129356	0.00382248	RN7SL792P	misc_RNA
ENSG00000248577.1	0.582809	-1.20062	0.354564	-3.38617	0.000708748	0.00224947	AC091435.1	processed_pseudogene
ENSG00000174156.15	1.45016	-1.19982	0.262658	-4.568	4.92407e-06	2.71464e-05	GSTA3	protein_coding
ENSG00000148123.15	45.4019	-1.1998	0.216446	-5.54316	2.97063e-08	2.76887e-07	PLPPR1	protein_coding
ENSG00000233569.2	18.8692	-1.19969	0.268939	-4.4608	8.16534e-06	4.25647e-05	AL161630.1	lncRNA
ENSG00000258619.2	0.400971	-1.19945	0.470385	-2.54993	0.0107745	0.0244651	AL136298.2	processed_pseudogene
ENSG00000169040.14	0.832737	-1.19924	0.256178	-4.68128	2.85092e-06	1.65815e-05	PMCHL2	transcribed_unprocessed_pseudogene
ENSG00000123836.15	1320.61	-1.19916	0.107205	-11.1856	4.79515e-29	1.6944e-26	PFKFB2	protein_coding
ENSG00000237162.1	0.914258	-1.19822	0.249606	-4.80044	1.58314e-06	9.82659e-06	RPS20P9	processed_pseudogene
ENSG00000259511.3	2.9378	-1.19773	0.181606	-6.59519	4.24721e-11	7.35506e-10	UBE2Q2L	transcribed_unprocessed_pseudogene
ENSG00000047662.5	37.1164	-1.19744	0.116684	-10.2622	1.04269e-24	2.08177e-22	FAM184B	protein_coding
ENSG00000198597.9	10.7388	-1.19739	0.207637	-5.76672	8.08268e-09	8.56007e-08	ZNF536	protein_coding
ENSG00000270553.1	2.21121	-1.19668	0.228979	-5.22617	1.73062e-07	1.35632e-06	AC011921.3	processed_pseudogene
ENSG00000250670.1	1.24223	-1.19649	0.247286	-4.83847	1.30839e-06	8.2876e-06	AC004063.1	lncRNA
ENSG00000279391.1	1.21875	-1.19615	0.234555	-5.09968	3.40237e-07	2.4952e-06	AC116456.2	TEC
ENSG00000278498.1	0.520517	-1.19589	0.356553	-3.35402	0.000796453	0.00249353	AL356608.2	misc_RNA
ENSG00000261939.1	1.02795	-1.19576	0.230748	-5.1821	2.19396e-07	1.68139e-06	LARP7P2	processed_pseudogene
ENSG00000201365.1	0.557737	-1.19465	0.411856	-2.90066	0.00372382	0.0096612	Y_RNA	misc_RNA
ENSG00000166816.15	803.079	-1.19457	0.120454	-9.91726	3.50231e-23	5.62936e-21	LDHD	protein_coding
ENSG00000251348.1	10.4518	-1.19433	0.153034	-7.80437	5.98009e-15	2.19679e-13	HSPD1P11	processed_pseudogene
ENSG00000257741.6	0.661232	-1.19341	0.420165	-2.84033	0.00450664	0.0114265	LINC01490	lncRNA
ENSG00000270577.1	1.25513	-1.19288	0.226056	-5.27692	1.31376e-07	1.06061e-06	AC006023.1	processed_pseudogene
ENSG00000226258.7	6.52092	-1.19286	0.240616	-4.95755	7.13893e-07	4.82316e-06	GRM7-AS3	lncRNA
ENSG00000249290.5	0.733906	-1.19283	0.288958	-4.12805	3.65849e-05	0.000161964	AC010181.1	lncRNA
ENSG00000168952.15	527.452	-1.19264	0.158292	-7.53443	4.9049e-14	1.54006e-12	STXBP6	protein_coding
ENSG00000212360.1	0.544338	-1.19219	0.272829	-4.36973	1.24398e-05	6.19876e-05	RNU6-1177P	snRNA
ENSG00000278525.1	0.702737	-1.19205	0.324523	-3.67322	0.000239513	0.000858601	RN7SL607P	misc_RNA
ENSG00000235096.2	0.989373	-1.19203	0.268191	-4.44472	8.8008e-06	4.54938e-05	AC118555.1	lncRNA
ENSG00000207109.1	0.449355	-1.19189	0.442617	-2.69282	0.00708511	0.0169369	SNORD38C	snoRNA
ENSG00000287695.1	2.21132	-1.19154	0.221895	-5.36983	7.88108e-08	6.68743e-07	AC008625.1	lncRNA
ENSG00000225284.1	0.642233	-1.1912	0.272065	-4.37837	1.19572e-05	5.98438e-05	AC018693.1	lncRNA
ENSG00000267000.1	0.565397	-1.19099	0.399849	-2.97859	0.00289573	0.0077606	AC016229.1	lncRNA
ENSG00000150054.18	518.959	-1.19098	0.105054	-11.3369	8.61674e-30	3.33603e-27	MPP7	protein_coding
ENSG00000207930.1	0.397265	-1.19084	0.517851	-2.29958	0.021472	0.0442177	MIR603	miRNA
ENSG00000216613.2	0.816238	-1.19079	0.244387	-4.87255	1.10166e-06	7.10757e-06	AL023284.2	processed_pseudogene
ENSG00000236769.3	1.45061	-1.19079	0.289034	-4.11989	3.79057e-05	0.000167179	LINC02659	lncRNA
ENSG00000201581.1	3.2356	-1.19072	0.202232	-5.88788	3.91184e-09	4.47181e-08	RN7SKP78	misc_RNA
ENSG00000233674.2	0.718725	-1.19039	0.31561	-3.77172	0.000162124	0.000606525	AL451062.1	processed_pseudogene
ENSG00000233544.1	1.32772	-1.19024	0.221999	-5.36147	8.2549e-08	6.97009e-07	EIF3KP2	processed_pseudogene
ENSG00000287380.1	1.93836	-1.18987	0.218151	-5.45432	4.91599e-08	4.37837e-07	AL589935.3	lncRNA
ENSG00000265490.1	6.71835	-1.18982	0.146904	-8.09931	5.52697e-16	2.48312e-14	AP001178.2	lncRNA
ENSG00000228729.1	2.44238	-1.18931	0.223898	-5.31184	1.08522e-07	8.91953e-07	AL627308.1	processed_pseudogene
ENSG00000287822.1	1.25611	-1.18901	0.236757	-5.02205	5.1124e-07	3.5823e-06	AC098679.5	lncRNA
ENSG00000250215.1	2.53165	-1.18861	0.176423	-6.73727	1.61395e-11	3.04096e-10	CIR1P2	processed_pseudogene
ENSG00000288080.1	1.27111	-1.18854	0.281235	-4.22616	2.37711e-05	0.000110257	AC005104.2	lncRNA
ENSG00000279548.1	3.08433	-1.18815	0.189559	-6.26797	3.65787e-10	5.26712e-09	AL022323.4	lncRNA
ENSG00000276213.1	0.554991	-1.18765	0.303165	-3.91752	8.94656e-05	0.000358434	Metazoa_SRP	misc_RNA
ENSG00000226963.1	2.68043	-1.18757	0.183669	-6.46582	1.00754e-10	1.62238e-09	AC078883.2	lncRNA
ENSG00000200834.1	2.15259	-1.18756	0.247742	-4.79352	1.63881e-06	1.01326e-05	Y_RNA	misc_RNA
ENSG00000251264.1	0.292551	-1.18745	0.708823	-1.67525	0.0938854		AC098868.1	lncRNA
ENSG00000099822.3	49.392	-1.18718	0.150443	-7.89126	2.99149e-15	1.17972e-13	HCN2	protein_coding
ENSG00000263499.1	3.48971	-1.18713	0.200488	-5.92119	3.19623e-09	3.72821e-08	AC007431.1	lncRNA
ENSG00000251171.1	1.62569	-1.18662	0.249877	-4.74881	2.04612e-06	1.23743e-05	AC096741.1	lncRNA
ENSG00000217495.2	1.46485	-1.18573	0.225436	-5.25972	1.44274e-07	1.15149e-06	AL136116.2	processed_pseudogene
ENSG00000257398.8	13.1881	-1.1849	0.157701	-7.5136	5.7525e-14	1.77613e-12	AC126177.3	lncRNA
ENSG00000109819.9	2772.81	-1.18417	0.122507	-9.6661	4.20091e-22	5.5832e-20	PPARGC1A	protein_coding
ENSG00000170615.15	3.09714	-1.18408	0.219337	-5.39844	6.72245e-08	5.78812e-07	SLC26A5	protein_coding
ENSG00000244384.3	1.35243	-1.18395	0.282858	-4.18565	2.8435e-05	0.000129475	RN7SL359P	misc_RNA
ENSG00000279885.1	3.28995	-1.18191	0.182748	-6.46742	9.96903e-11	1.60757e-09	AP005060.1	TEC
ENSG00000260012.1	1.75937	-1.18189	0.198117	-5.96564	2.43675e-09	2.91487e-08	AC007494.1	processed_pseudogene
ENSG00000244044.3	0.625324	-1.18186	0.424999	-2.78085	0.00542161	0.0134156	RN7SL735P	misc_RNA
ENSG00000286850.1	2.80074	-1.18166	0.211605	-5.58426	2.34701e-08	2.23638e-07	AL358232.2	lncRNA
ENSG00000229385.2	0.36008	-1.18067	0.463747	-2.54593	0.0108988	0.0247085	CTNNA2-AS1	lncRNA
ENSG00000162891.10	1.78936	-1.17996	0.268371	-4.39676	1.09879e-05	5.55169e-05	IL20	protein_coding
ENSG00000230718.1	0.40646	-1.1796	0.482584	-2.44433	0.0145121	0.0316199	AC114878.1	processed_pseudogene
ENSG00000241246.3	0.490874	-1.17935	0.827549	-1.42511	0.154126	0.233261	RN7SL302P	misc_RNA
ENSG00000280280.1	0.472482	-1.17918	0.424138	-2.78018	0.00543292	0.0134391	AC006435.5	TEC
ENSG00000065320.9	243.081	-1.17908	0.130692	-9.02183	1.84966e-19	1.5597e-17	NTN1	protein_coding
ENSG00000269662.1	0.873451	-1.17881	0.27974	-4.21395	2.50941e-05	0.000115743	BNIP3P39	processed_pseudogene
ENSG00000125997.5	10.7051	-1.17872	0.150397	-7.83735	4.60149e-15	1.7362e-13	BPIFB9P	transcribed_unitary_pseudogene
ENSG00000285780.2	0.524383	-1.17865	0.534583	-2.2048	0.0274678	0.0546839	AC109129.1	lncRNA
ENSG00000199824.1	1.18836	-1.17863	0.238886	-4.93388	8.0614e-07	5.38269e-06	RNU6-199P	snRNA
ENSG00000176635.18	10.5871	-1.17843	0.170469	-6.9129	4.74848e-12	9.96779e-11	HORMAD2	protein_coding
ENSG00000252003.1	0.740641	-1.1778	0.236501	-4.98009	6.35553e-07	4.35134e-06	RNU7-154P	snRNA
ENSG00000269356.1	3.22723	-1.17727	0.217259	-5.41875	6.00158e-08	5.23015e-07	AL356740.2	lncRNA
ENSG00000180116.15	3.0592	-1.17689	0.216709	-5.43075	5.61185e-08	4.92522e-07	C12orf40	protein_coding
ENSG00000224973.6	2.61881	-1.17627	0.213923	-5.49856	3.82896e-08	3.49051e-07	LARGE-AS1	lncRNA
ENSG00000263720.1	0.32845	-1.17618	0.604749	-1.9449	0.051787	0.0940527	AC023394.2	lncRNA
ENSG00000249690.1	1.20523	-1.17577	0.251337	-4.67806	2.89602e-06	1.6824e-05	AC110813.1	lncRNA
ENSG00000215887.5	0.656995	-1.17567	0.310023	-3.79219	0.000149322	0.000563889	ZNF859P	unprocessed_pseudogene
ENSG00000187398.12	22.0016	-1.17551	0.19923	-5.9003	3.62837e-09	4.18621e-08	LUZP2	protein_coding
ENSG00000248802.1	9.61554	-1.17537	0.190404	-6.17305	6.69861e-10	9.08721e-09	AC078850.2	lncRNA
ENSG00000278961.2	0.340739	-1.17513	0.683062	-1.72039	0.0853618	0.143142	SMIM34B	protein_coding
ENSG00000230102.8	29.3124	-1.17506	0.123367	-9.52494	1.65135e-21	1.9554e-19	LINC02028	lncRNA
ENSG00000287523.1	9.1903	-1.17503	0.168376	-6.97862	2.98099e-12	6.55097e-11	AC003044.1	lncRNA
ENSG00000273118.1	0.883012	-1.17493	0.270353	-4.34593	1.38689e-05	6.82834e-05	AC093865.1	lncRNA
ENSG00000251623.2	8.60741	-1.17488	0.327954	-3.58246	0.000340376	0.00117598	AC139491.5	transcribed_processed_pseudogene
ENSG00000257612.2	2.16832	-1.1748	0.233264	-5.03635	4.74487e-07	3.3522e-06	MIR4307HG	lncRNA
ENSG00000228351.3	1.29636	-1.17457	0.220909	-5.31697	1.05507e-07	8.69258e-07	AC018832.1	lncRNA
ENSG00000225017.1	1.51803	-1.17402	0.231933	-5.06188	4.15132e-07	2.98153e-06	AP004289.1	processed_pseudogene
ENSG00000201649.1	1.21252	-1.17398	0.28682	-4.0931	4.2565e-05	0.00018527	RNY4P34	misc_RNA
ENSG00000236549.1	1.29383	-1.17394	0.228111	-5.14637	2.65582e-07	1.99738e-06	RPS27AP7	processed_pseudogene
ENSG00000252164.1	0.771658	-1.17386	0.261815	-4.48355	7.34107e-06	3.86846e-05	RNA5SP282	rRNA_pseudogene
ENSG00000194297.2	0.852992	-1.1737	0.208947	-5.61719	1.94093e-08	1.87739e-07	RNU1-75P	snRNA
ENSG00000251665.1	1.35948	-1.17335	0.223499	-5.2499	1.5218e-07	1.20689e-06	AC005920.3	lncRNA
ENSG00000264956.2	1.30065	-1.17306	0.33338	-3.5187	0.000433672	0.00145735	AC138761.1	lncRNA
ENSG00000196167.10	422.353	-1.17306	0.123959	-9.46327	2.98448e-21	3.37254e-19	COLCA1	lncRNA
ENSG00000280379.1	1.85193	-1.17293	0.19239	-6.09664	1.08324e-09	1.40079e-08	AP003072.5	TEC
ENSG00000235445.1	2.63956	-1.1726	0.236502	-4.95809	7.11878e-07	4.8132e-06	AC016027.3	lncRNA
ENSG00000228092.1	0.434827	-1.17201	0.486413	-2.40951	0.0159742	0.0343368	COX6CP15	processed_pseudogene
ENSG00000114248.10	60.1853	-1.17178	0.180616	-6.48767	8.71729e-11	1.42586e-09	LRRC31	protein_coding
ENSG00000237953.1	0.645539	-1.17132	0.290908	-4.02643	5.66299e-05	0.000238311	RPS13P5	processed_pseudogene
ENSG00000173627.8	0.910766	-1.17119	0.255764	-4.57919	4.66775e-06	2.58421e-05	APOBEC4	protein_coding
ENSG00000201818.1	1.56191	-1.17105	0.215324	-5.43852	5.3725e-08	4.73851e-07	RNY4P17	misc_RNA
ENSG00000096006.12	2.18434	-1.17079	0.235691	-4.9675	6.78223e-07	4.61016e-06	CRISP3	protein_coding
ENSG00000261630.1	3.85517	-1.17042	0.165295	-7.0808	1.43322e-12	3.34616e-11	AC007496.2	lncRNA
ENSG00000236244.1	0.503368	-1.17034	0.400574	-2.92167	0.00348161	0.00911405	SLC35F3-AS1	lncRNA
ENSG00000288077.1	0.787288	-1.17031	0.2823	-4.14562	3.38901e-05	0.000151404	AC027129.1	lncRNA
ENSG00000221639.1	2.36439	-1.16973	0.179492	-6.51693	7.17619e-11	1.19085e-09	AC053527.1	snoRNA
ENSG00000221808.1	0.427489	-1.16887	0.575118	-2.03241	0.0421123	0.0788763	MIR1256	miRNA
ENSG00000231564.1	0.970802	-1.16877	0.25687	-4.55004	5.36352e-06	2.92934e-05	EIF4A1P11	processed_pseudogene
ENSG00000234995.1	0.704601	-1.16776	0.307381	-3.79905	0.000145252	0.000550247	RPS3AP28	processed_pseudogene
ENSG00000215277.8	13.1163	-1.16774	0.120446	-9.69512	3.16281e-22	4.31956e-20	RNF212B	protein_coding
ENSG00000201957.1	0.548473	-1.1677	0.314668	-3.71091	0.000206517	0.000752126	AC076966.1	snoRNA
ENSG00000277062.1	0.597601	-1.16739	0.370038	-3.15479	0.00160615	0.00462184	RN7SL88P	misc_RNA
ENSG00000255067.1	0.654086	-1.1672	0.330896	-3.52739	0.000419676	0.0014163	AC013549.4	lncRNA
ENSG00000260033.1	0.491736	-1.16697	0.317994	-3.66978	0.000242759	0.00086898	AC023813.2	processed_pseudogene
ENSG00000120094.9	3.39401	-1.16692	0.309735	-3.76748	0.000164907	0.000616262	HOXB1	protein_coding
ENSG00000217181.1	1.73923	-1.16663	0.225447	-5.17475	2.2822e-07	1.74109e-06	AL139039.2	processed_pseudogene
ENSG00000229918.1	1.37059	-1.16627	0.228992	-5.09306	3.52339e-07	2.57209e-06	DOCK9-AS1	lncRNA
ENSG00000217896.2	1.75577	-1.16576	0.288442	-4.04158	5.30922e-05	0.000224933	ZNF839P1	processed_pseudogene
ENSG00000237645.1	0.540554	-1.16576	0.320383	-3.63864	0.000274086	0.000967616	AC092967.1	processed_pseudogene
ENSG00000255872.3	0.687179	-1.16513	0.292803	-3.97925	6.91341e-05	0.000284689	AL138752.2	protein_coding
ENSG00000234274.1	1.30387	-1.16481	0.265062	-4.39447	1.11041e-05	5.60532e-05	COX7BP2	processed_pseudogene
ENSG00000286429.1	1.42181	-1.16451	0.235196	-4.95121	7.37534e-07	4.96556e-06	BX004807.1	lncRNA
ENSG00000243049.3	0.527632	-1.16435	0.431251	-2.69994	0.00693522	0.0166143	RN7SL33P	misc_RNA
ENSG00000287759.1	20.9133	-1.16402	0.121621	-9.57092	1.0596e-21	1.29963e-19	AL353151.2	lncRNA
ENSG00000237070.1	5.97846	-1.16349	0.242589	-4.79612	1.6177e-06	1.00174e-05	AC005550.2	lncRNA
ENSG00000168481.9	16.2293	-1.1634	0.180923	-6.43036	1.27302e-10	2.01273e-09	LGI3	protein_coding
ENSG00000286528.1	0.490392	-1.16323	0.504776	-2.30445	0.0211972	0.0437479	AC099506.3	lncRNA
ENSG00000221493.1	0.611497	-1.16284	0.290843	-3.99818	6.38312e-05	0.000265083	MIR320C1	miRNA
ENSG00000109205.16	4.82839	-1.16276	0.492439	-2.36123	0.0182144	0.0384523	ODAM	protein_coding
ENSG00000172568.5	0.586073	-1.16268	0.297464	-3.90864	9.28153e-05	0.000370122	FNDC9	protein_coding
ENSG00000240813.2	0.888515	-1.16231	0.224986	-5.16615	2.38967e-07	1.81376e-06	AC015908.1	processed_pseudogene
ENSG00000222346.1	0.563559	-1.1621	0.314039	-3.7005	0.000215176	0.000780295	RNA5SP237	rRNA_pseudogene
ENSG00000207455.1	0.367557	-1.16179	0.552406	-2.10314	0.0354533	0.0680324	RNU6-331P	snRNA
ENSG00000135063.19	337.228	-1.16166	0.120336	-9.65344	4.75324e-22	6.26119e-20	FAM189A2	protein_coding
ENSG00000226367.6	5.11709	-1.16157	0.147271	-7.88728	3.08838e-15	1.21363e-13	ST7-AS2	lncRNA
ENSG00000199240.1	1.09594	-1.16145	0.203393	-5.71036	1.12737e-08	1.15018e-07	RNA5SP46	rRNA_pseudogene
ENSG00000226496.3	54.0453	-1.16135	0.180344	-6.43963	1.19763e-10	1.89962e-09	LINC00323	lncRNA
ENSG00000261178.2	0.773093	-1.16098	0.348678	-3.32966	0.000869534	0.00269579	AC009169.1	unprocessed_pseudogene
ENSG00000229531.6	1.6642	-1.16097	0.233343	-4.97539	6.51153e-07	4.44993e-06	RABGAP1L-AS1	lncRNA
ENSG00000275017.1	7.06462	-1.16077	0.150994	-7.6875	1.50039e-14	5.15048e-13	AL353748.2	processed_pseudogene
ENSG00000266533.1	0.620071	-1.1605	0.331895	-3.4966	0.000471232	0.00156994	MIR3619	miRNA
ENSG00000200575.1	0.439491	-1.16018	0.384041	-3.02097	0.00251963	0.00686756	RNU6-414P	snRNA
ENSG00000261714.2	2.10804	-1.16007	0.220018	-5.27263	1.34481e-07	1.08273e-06	AC105137.1	processed_pseudogene
ENSG00000240870.2	1.18056	-1.15969	0.281874	-4.11422	3.8849e-05	0.0001709	RPL19P14	processed_pseudogene
ENSG00000258288.1	1.15079	-1.15961	0.282735	-4.10141	4.10647e-05	0.000179653	NENFP2	processed_pseudogene
ENSG00000250366.3	64.5871	-1.15961	0.289099	-4.01113	6.04295e-05	0.000252534	TUNAR	protein_coding
ENSG00000217195.1	0.639492	-1.15961	0.353002	-3.28498	0.00101988	0.00309932	AL513475.1	processed_pseudogene
ENSG00000253623.1	1.28136	-1.15933	0.25781	-4.49686	6.89639e-06	3.661e-05	AC009879.1	processed_pseudogene
ENSG00000223584.1	0.87556	-1.15924	0.290296	-3.99331	6.51582e-05	0.000269764	TVP23CP1	processed_pseudogene
ENSG00000243035.3	0.63367	-1.159	0.376569	-3.0778	0.00208536	0.00582181	RN7SL810P	misc_RNA
ENSG00000236911.6	0.714299	-1.15876	0.302613	-3.82917	0.000128576	0.000494268	AL137789.1	lncRNA
ENSG00000275103.1	0.86689	-1.15874	0.314106	-3.68903	0.000225114	0.000812349	AF117829.2	unprocessed_pseudogene
ENSG00000153446.16	143.77	-1.15859	0.150441	-7.7013	1.34685e-14	4.67022e-13	C16orf89	protein_coding
ENSG00000250885.1	12.9253	-1.1585	0.207127	-5.59321	2.22912e-08	2.13435e-07	LINC02061	lncRNA
ENSG00000168539.4	2.86115	-1.15776	0.200512	-5.77401	7.74059e-09	8.23696e-08	CHRM1	protein_coding
ENSG00000231148.1	0.819041	-1.15745	0.314694	-3.67804	0.000235037	0.000843848	HMGB1P7	processed_pseudogene
ENSG00000257746.2	3.82584	-1.15735	0.190962	-6.06063	1.35585e-09	1.7094e-08	AC138123.2	lncRNA
ENSG00000207292.1	0.743169	-1.15678	0.292622	-3.95315	7.71297e-05	0.000314013	Y_RNA	misc_RNA
ENSG00000272215.1	0.431485	-1.15675	0.536439	-2.15635	0.0310563	0.0607442	U7	snRNA
ENSG00000167080.9	243.371	-1.15659	0.20417	-5.66486	1.47146e-08	1.45813e-07	B4GALNT2	protein_coding
ENSG00000211865.1	0.612352	-1.15605	0.3302	-3.50107	0.000463402	0.00154594	TRAJ24	TR_J_gene
ENSG00000241052.1	0.759453	-1.15562	0.33378	-3.46222	0.000535731	0.00175721	RPL23AP70	processed_pseudogene
ENSG00000255097.1	1.87679	-1.15527	0.262474	-4.40144	1.07535e-05	5.44376e-05	AP006259.1	lncRNA
ENSG00000266049.1	2.23603	-1.15516	0.262356	-4.40303	1.0675e-05	5.40956e-05	AP001011.1	lncRNA
ENSG00000224323.2	0.610091	-1.15494	0.292163	-3.95305	7.71597e-05	0.000314106	DPRXP1	processed_pseudogene
ENSG00000256243.2	1.48772	-1.15493	0.23178	-4.98289	6.26424e-07	4.29412e-06	RPL7AP3	processed_pseudogene
ENSG00000259999.1	2.08611	-1.15491	0.203287	-5.68117	1.33775e-08	1.34025e-07	AC009054.1	lncRNA
ENSG00000283636.1	1.39493	-1.15448	0.208189	-5.54537	2.9334e-08	2.7386e-07	Metazoa_SRP	misc_RNA
ENSG00000231726.2	0.835537	-1.1543	0.266706	-4.32798	1.50482e-05	7.3488e-05	HMGN2P38	processed_pseudogene
ENSG00000222378.1	0.568887	-1.15387	0.334961	-3.44481	0.00057147	0.00186073	RNA5SP44	rRNA_pseudogene
ENSG00000242818.3	1.12965	-1.15367	0.292523	-3.94387	8.01763e-05	0.000325079	RN7SL846P	misc_RNA
ENSG00000286855.1	1.76482	-1.15318	0.217159	-5.31031	1.09441e-07	8.98842e-07	AC074024.1	lncRNA
ENSG00000203730.3	7.59592	-1.15282	0.152167	-7.57602	3.56311e-14	1.14377e-12	TEDDM1	protein_coding
ENSG00000227950.1	1.85119	-1.15272	0.236204	-4.88019	1.05986e-06	6.85674e-06	AL590128.1	processed_pseudogene
ENSG00000227534.1	1.06956	-1.15233	0.26916	-4.28121	1.85878e-05	8.85781e-05	AP1M2P1	processed_pseudogene
ENSG00000267196.1	0.598172	-1.15213	0.339046	-3.39816	0.000678413	0.00216337	AC091044.1	lncRNA
ENSG00000229120.2	0.638887	-1.15181	0.312077	-3.69079	0.000223555	0.000807441	CYCSP4	processed_pseudogene
ENSG00000251748.1	0.558944	-1.15174	0.379791	-3.03256	0.00242486	0.00664439	RNU4ATAC11P	snRNA
ENSG00000279121.1	1.84315	-1.15162	0.210175	-5.47934	4.26913e-08	3.85312e-07	AC073592.5	TEC
ENSG00000250860.1	1.31511	-1.15116	0.206763	-5.56755	2.58341e-08	2.44466e-07	AC093225.1	processed_pseudogene
ENSG00000232015.2	1.17477	-1.15112	0.237751	-4.8417	1.28735e-06	8.16591e-06	HSPE1P25	processed_pseudogene
ENSG00000222724.1	0.530074	-1.15105	0.382	-3.01322	0.00258489	0.0070205	RNU2-63P	snRNA
ENSG00000258010.4	6.10625	-1.15085	0.186017	-6.18682	6.13896e-10	8.3945e-09	AC016705.1	lncRNA
ENSG00000253480.1	0.763561	-1.15025	0.299465	-3.84101	0.000122528	0.000474004	AC122713.1	processed_pseudogene
ENSG00000250974.4	4.99848	-1.15013	0.16265	-7.0712	1.536e-12	3.56369e-11	LINC02196	lncRNA
ENSG00000199420.1	1.18403	-1.14935	0.285485	-4.02594	5.67475e-05	0.000238716	RN7SKP170	misc_RNA
ENSG00000197901.12	1748.03	-1.14934	0.222542	-5.16459	2.4097e-07	1.82772e-06	SLC22A6	protein_coding
ENSG00000211868.1	0.62043	-1.14911	0.367559	-3.12632	0.00177009	0.00503545	TRAJ21	TR_J_gene
ENSG00000252474.1	1.13067	-1.14829	0.237705	-4.83071	1.36044e-06	8.58433e-06	RNU6-539P	snRNA
ENSG00000186452.11	2.70054	-1.14808	0.201555	-5.69611	1.22571e-08	1.23831e-07	TMPRSS12	protein_coding
ENSG00000250582.1	1.32307	-1.14802	0.233522	-4.9161	8.82839e-07	5.82148e-06	SMAD1-AS2	lncRNA
ENSG00000229115.1	0.474454	-1.14796	0.3762	-3.05147	0.00227723	0.00628653	AL390774.1	processed_pseudogene
ENSG00000264767.2	0.394762	-1.14794	0.52497	-2.18668	0.0287661	0.0568958	RN7SL237P	misc_RNA
ENSG00000229010.1	2.55437	-1.1479	0.187674	-6.11648	9.56639e-10	1.25088e-08	AL161672.1	processed_pseudogene
ENSG00000261320.1	0.645442	-1.1477	0.277026	-4.14293	3.42898e-05	0.000152913	AC009061.1	lncRNA
ENSG00000241295.1	0.349812	-1.14723	0.540685	-2.12181	0.0338539	0.0654315	ZBTB20-AS2	lncRNA
ENSG00000260865.1	2.12262	-1.14693	0.245014	-4.6811	2.85346e-06	1.65941e-05	AC010287.1	transcribed_processed_pseudogene
ENSG00000264448.5	1.58513	-1.14686	0.210785	-5.44091	5.30092e-08	4.68094e-07	MIR378D2HG	lncRNA
ENSG00000213233.5	0.826437	-1.14635	0.335615	-3.41566	0.000636273	0.0020451	RPL23AP62	processed_pseudogene
ENSG00000241723.1	0.942634	-1.14617	0.245875	-4.66158	3.13788e-06	1.80478e-05	AC074276.1	processed_pseudogene
ENSG00000200571.1	0.442788	-1.14466	0.451345	-2.53611	0.0112091	0.0253152	RNU6-1284P	snRNA
ENSG00000167741.11	102.438	-1.14466	0.209917	-5.45289	4.95565e-08	4.41016e-07	GGT6	protein_coding
ENSG00000224245.1	3.62629	-1.14462	0.225954	-5.06574	4.06809e-07	2.92749e-06	AL358232.1	unprocessed_pseudogene
ENSG00000211849.1	0.52363	-1.14459	0.347247	-3.29619	0.000980074	0.00299368	TRAJ40	TR_J_gene
ENSG00000270764.1	0.532707	-1.14428	0.404654	-2.8278	0.0046869	0.011825	AC005070.1	processed_pseudogene
ENSG00000164621.5	0.52671	-1.14415	0.316308	-3.61721	0.000297798	0.00104245	SMAD5-AS1	lncRNA
ENSG00000207260.1	1.23896	-1.14388	0.294269	-3.88719	0.00010141	0.000400806	RNU6-35P	snRNA
ENSG00000238531.1	0.365343	-1.14357	0.539392	-2.12012	0.0339962	0.0656637	SNORD105B	snoRNA
ENSG00000267712.6	9.13664	-1.14283	0.214371	-5.3311	9.76182e-08	8.11474e-07	LINC01539	lncRNA
ENSG00000257754.1	0.897263	-1.14265	0.25728	-4.44128	8.94252e-06	4.61567e-05	AC012555.2	lncRNA
ENSG00000213133.4	1.35379	-1.14247	0.210537	-5.42647	5.74782e-08	5.03067e-07	PPP1R14BP5	processed_pseudogene
ENSG00000274006.1	0.295589	-1.14196	1.06109	-1.07621	0.281832	0.382631	AP001825.2	misc_RNA
ENSG00000111058.8	3250.2	-1.1416	0.102435	-11.1446	7.60762e-29	2.60549e-26	ACSS3	protein_coding
ENSG00000233363.1	0.765091	-1.14153	0.260583	-4.38067	1.18318e-05	5.92826e-05	AC006019.2	lncRNA
ENSG00000179299.17	339.475	-1.14151	0.108332	-10.5371	5.82591e-26	1.39455e-23	NSUN7	protein_coding
ENSG00000225730.1	1.55782	-1.14105	0.220038	-5.18571	2.15198e-07	1.6528e-06	ADGRF5-AS1	lncRNA
ENSG00000201435.1	1.13284	-1.14096	0.261198	-4.36817	1.25295e-05	6.23854e-05	RNU4-24P	snRNA
ENSG00000251516.1	2.22761	-1.14041	0.224253	-5.08538	3.66895e-07	2.66655e-06	AC098583.2	unprocessed_pseudogene
ENSG00000250436.1	5.80244	-1.14026	0.229994	-4.95778	7.13028e-07	4.81815e-06	LINC02499	lncRNA
ENSG00000197360.9	20.1466	-1.14006	0.173777	-6.56048	5.36346e-11	9.13183e-10	ZNF98	protein_coding
ENSG00000224121.1	1.16329	-1.13977	0.243217	-4.68622	2.78291e-06	1.62283e-05	ATG12P2	processed_pseudogene
ENSG00000278913.1	0.586052	-1.13963	0.305391	-3.7317	0.000190194	0.000699429	AC026797.1	TEC
ENSG00000255808.1	0.358515	-1.13949	0.524958	-2.17063	0.0299588	0.0588951	PDE2A-AS1	lncRNA
ENSG00000263527.1	0.559871	-1.13908	0.282687	-4.02948	5.59005e-05	0.000235576	MIR4526	miRNA
ENSG00000250886.1	1.29342	-1.13897	0.199101	-5.72057	1.06168e-08	1.08915e-07	AC010368.1	processed_pseudogene
ENSG00000231102.1	1.34144	-1.13858	0.243329	-4.67918	2.8803e-06	1.67415e-05	AL035588.1	lncRNA
ENSG00000250473.1	1.43333	-1.13823	0.210503	-5.40716	6.40303e-08	5.54204e-07	DUTP7	processed_pseudogene
ENSG00000253754.1	0.947404	-1.13806	0.246721	-4.61273	3.97413e-06	2.23156e-05	AC087620.1	lncRNA
ENSG00000206784.1	0.634492	-1.13793	0.396624	-2.86903	0.00411731	0.0105462	Y_RNA	misc_RNA
ENSG00000201600.1	0.734949	-1.1378	0.22292	-5.10409	3.32397e-07	2.44334e-06	RN7SKP124	misc_RNA
ENSG00000219608.3	1.68436	-1.13779	0.198089	-5.74385	9.25477e-09	9.62734e-08	HIGD1AP16	processed_pseudogene
ENSG00000232539.1	1.45278	-1.13771	0.271838	-4.18524	2.84871e-05	0.000129668	LINC00945	lncRNA
ENSG00000279735.2	2.17477	-1.13744	0.189642	-5.99781	1.99997e-09	2.44427e-08	AC124312.4	TEC
ENSG00000234159.1	1.83585	-1.13735	0.284502	-3.99768	6.39653e-05	0.000265566	RBPMSLP	processed_pseudogene
ENSG00000224822.1	5.11282	-1.13698	0.221152	-5.14118	2.73022e-07	2.04298e-06	THRB-IT1	lncRNA
ENSG00000213003.3	2.19459	-1.13685	0.181729	-6.25573	3.95657e-10	5.64609e-09	BTF3P12	processed_pseudogene
ENSG00000258400.1	3.05192	-1.13668	0.18562	-6.12367	9.14442e-10	1.2017e-08	AL591767.1	lncRNA
ENSG00000254878.1	0.601089	-1.13638	0.243138	-4.67382	2.95654e-06	1.71287e-05	AC103794.1	lncRNA
ENSG00000221888.4	0.461085	-1.13635	0.488622	-2.32562	0.0200389	0.0416894	OR1C1	protein_coding
ENSG00000228196.1	1.12148	-1.13623	0.234645	-4.84234	1.28321e-06	8.14315e-06	PTPN2P1	processed_pseudogene
ENSG00000233693.1	1.11478	-1.13619	0.264702	-4.29235	1.76794e-05	8.47573e-05	PBX1-AS1	lncRNA
ENSG00000111052.7	3188.74	-1.13605	0.119486	-9.50776	1.9482e-21	2.27068e-19	LIN7A	protein_coding
ENSG00000236375.3	1.48329	-1.13597	0.24688	-4.60129	4.19874e-06	2.34643e-05	POU5F1P5	processed_pseudogene
ENSG00000239964.3	1.41723	-1.13582	0.23309	-4.87289	1.0998e-06	7.09657e-06	RN7SL748P	misc_RNA
ENSG00000230221.2	1.89951	-1.13509	0.206512	-5.49647	3.87462e-08	3.52781e-07	AL157384.1	processed_pseudogene
ENSG00000175985.10	26.2063	-1.13492	0.137141	-8.27556	1.27849e-16	6.42461e-15	PLEKHD1	protein_coding
ENSG00000276407.5	2.02772	-1.13484	0.312755	-3.62852	0.000285047	0.00100246	AC024559.2	lncRNA
ENSG00000120563.10	7.27268	-1.13456	0.184991	-6.13305	8.62089e-10	1.14099e-08	LYZL1	protein_coding
ENSG00000207444.1	0.516696	-1.13399	0.448996	-2.52561	0.0115497	0.0259737	SNORD56B	snoRNA
ENSG00000232778.1	2.01441	-1.13397	0.254352	-4.45828	8.26191e-06	4.30178e-05	RPL23AP50	processed_pseudogene
ENSG00000255060.1	0.667961	-1.13394	0.307961	-3.6821	0.000231317	0.000832439	AC009656.1	lncRNA
ENSG00000285486.1	3.72458	-1.13344	0.252391	-4.4908	7.09571e-06	3.75648e-05	AC003043.2	lncRNA
ENSG00000231697.3	1.58089	-1.13338	0.233146	-4.86126	1.16639e-06	7.47429e-06	NANOGP5	transcribed_processed_pseudogene
ENSG00000265118.5	0.677287	-1.13333	0.282792	-4.00764	6.1329e-05	0.000255813	AC134669.1	protein_coding
ENSG00000279341.1	0.53855	-1.1329	0.336597	-3.36575	0.000763367	0.00240347	AP000756.1	TEC
ENSG00000252494.1	1.2498	-1.13279	0.224192	-5.05275	4.35492e-07	3.10728e-06	RNU6-126P	snRNA
ENSG00000267587.1	1.47927	-1.13269	0.232906	-4.8633	1.15442e-06	7.40394e-06	AC090241.1	processed_pseudogene
ENSG00000243914.1	2.84399	-1.13258	0.167497	-6.76176	1.36325e-11	2.6117e-10	RPL5P14	processed_pseudogene
ENSG00000230894.2	9.29915	-1.13223	0.146992	-7.70265	1.33273e-14	4.62848e-13	AL133284.1	lncRNA
ENSG00000207507.1	0.571324	-1.13208	0.288226	-3.92774	8.57465e-05	0.000345024	RNU6-9	snRNA
ENSG00000258144.2	1.61595	-1.132	0.331255	-3.41732	0.00063242	0.00203507	LINC02406	lncRNA
ENSG00000153802.12	6.39095	-1.13169	0.159241	-7.10677	1.18787e-12	2.81766e-11	TMPRSS11D	protein_coding
ENSG00000250170.1	1.21556	-1.13127	0.262729	-4.30584	1.66353e-05	8.02963e-05	RASA2-IT1	lncRNA
ENSG00000144406.19	43.1614	-1.13018	0.135768	-8.3244	8.4756e-17	4.4343e-15	UNC80	protein_coding
ENSG00000279334.1	0.930242	-1.12996	0.243019	-4.64967	3.32474e-06	1.90096e-05	AC073592.6	TEC
ENSG00000258620.2	1.5305	-1.12986	0.221178	-5.10837	3.24943e-07	2.39448e-06	AL135838.1	lncRNA
ENSG00000268461.2	2.76496	-1.1298	0.173096	-6.52701	6.7096e-11	1.11968e-09	AC078899.2	unprocessed_pseudogene
ENSG00000271483.1	1.1553	-1.12973	0.328964	-3.4342	0.000594305	0.00192396	AC108676.2	processed_pseudogene
ENSG00000287701.1	1.04579	-1.12937	0.232837	-4.85048	1.23164e-06	7.84945e-06	AC116337.4	lncRNA
ENSG00000241577.1	1.80673	-1.12921	0.230314	-4.90289	9.44354e-07	6.19044e-06	AC060234.3	lncRNA
ENSG00000241868.3	1.03469	-1.12916	0.253532	-4.45374	8.43884e-06	4.38825e-05	RN7SL434P	misc_RNA
ENSG00000249364.6	6.21608	-1.12909	0.180432	-6.25769	3.9072e-10	5.58281e-09	AC112206.2	lncRNA
ENSG00000265462.1	1.3205	-1.12894	0.221839	-5.08903	3.59894e-07	2.62123e-06	MIR3680-1	miRNA
ENSG00000265093.2	2.00609	-1.12892	0.219536	-5.1423	2.71396e-07	2.03192e-06	RN7SL246P	misc_RNA
ENSG00000199940.1	1.06742	-1.12869	0.335053	-3.36869	0.00075525	0.00238027	RN7SKP75	misc_RNA
ENSG00000270495.1	0.316384	-1.12816	0.953328	-1.1834	0.236653	0.331503	AC008825.2	processed_pseudogene
ENSG00000285095.2	23.7376	-1.12792	0.116397	-9.6903	3.31566e-22	4.48703e-20	AC025887.2	lncRNA
ENSG00000230735.1	0.746228	-1.1277	0.313903	-3.5925	0.000327526	0.00113579	AC093423.2	lncRNA
ENSG00000232667.10	0.617091	-1.12723	0.357455	-3.15349	0.00161333	0.0046399	AC004862.1	lncRNA
ENSG00000286994.1	0.697892	-1.12716	0.241085	-4.67538	2.9341e-06	1.70231e-05	AC069243.1	lncRNA
ENSG00000233073.2	9.33389	-1.12666	0.183773	-6.13074	8.74711e-10	1.15563e-08	GRM3-AS1	lncRNA
ENSG00000270314.1	0.997491	-1.12639	0.246264	-4.57389	4.78749e-06	2.6459e-05	AC007161.2	processed_pseudogene
ENSG00000240808.1	3.38011	-1.12624	0.166363	-6.76979	1.28973e-11	2.48582e-10	AC126389.1	processed_pseudogene
ENSG00000103740.10	38.564	-1.12602	0.139114	-8.0942	5.76424e-16	2.5819e-14	ACSBG1	protein_coding
ENSG00000255003.1	1.13756	-1.12566	0.308445	-3.64947	0.000262787	0.000932052	CYCSP28	processed_pseudogene
ENSG00000221375.1	0.392104	-1.1255	0.733	-1.53547	0.124667	0.196008	RNU6ATAC23P	snRNA
ENSG00000261120.1	1.54299	-1.12526	0.256634	-4.3847	1.16145e-05	5.82989e-05	AL133299.1	lncRNA
ENSG00000125255.7	1165.11	-1.12484	0.183725	-6.12242	9.21632e-10	1.21008e-08	SLC10A2	protein_coding
ENSG00000278716.1	1.22327	-1.1246	0.291946	-3.85208	0.00011712	0.000455419	AC133540.1	lncRNA
ENSG00000235669.1	1.04549	-1.12453	0.256746	-4.37992	1.18726e-05	5.94669e-05	CHN2-AS1	lncRNA
ENSG00000145826.9	21.661	-1.12448	0.190919	-5.88982	3.86617e-09	4.4273e-08	LECT2	protein_coding
ENSG00000213046.4	1.81256	-1.12431	0.21376	-5.2597	1.44288e-07	1.15149e-06	EEF1A1P32	unprocessed_pseudogene
ENSG00000236576.1	0.941742	-1.12399	0.246146	-4.56636	4.96271e-06	2.73357e-05	AC241520.1	processed_pseudogene
ENSG00000207036.1	0.453163	-1.12383	0.415936	-2.70193	0.00689372	0.0165345	RNY3P14	misc_RNA
ENSG00000199377.1	1.22072	-1.12363	0.22922	-4.90199	9.48708e-07	6.21624e-06	RNU5F-1	snRNA
ENSG00000285606.1	0.972275	-1.12347	0.244656	-4.59206	4.38893e-06	2.44383e-05	AC079200.1	lncRNA
ENSG00000229601.1	2.39528	-1.12338	0.196193	-5.72592	1.02877e-08	1.06027e-07	AL590762.1	processed_pseudogene
ENSG00000244229.1	3.76616	-1.12278	0.195605	-5.74004	9.4653e-09	9.82798e-08	RPL26P35	processed_pseudogene
ENSG00000126231.15	15.4554	-1.12248	0.156205	-7.18591	6.67593e-13	1.65959e-11	PROZ	protein_coding
ENSG00000267055.1	1.8372	-1.1224	0.24147	-4.64819	3.34861e-06	1.91239e-05	AC007001.1	lncRNA
ENSG00000259358.1	0.418196	-1.12215	0.33451	-3.35461	0.000794767	0.00248913	DEPDC1P1	processed_pseudogene
ENSG00000197870.12	3.15495	-1.12196	0.169156	-6.63274	3.29517e-11	5.87783e-10	PRB3	protein_coding
ENSG00000244203.2	2.25792	-1.12178	0.189151	-5.9306	3.01836e-09	3.53699e-08	FOXP1-AS1	lncRNA
ENSG00000233333.2	5.33641	-1.12174	0.145338	-7.71815	1.18028e-14	4.12801e-13	RNFT1P2	processed_pseudogene
[truncated: 58,662 more rows]
